# Supplementary material
Source: PubMed Central journal article supplement (PMC2915437)

# Supplementary Information

For

## Enzymatic Route to Preparative-scale Synthesis of UDP-GlcNAc/GalNAc, their analogues and GDP-fucose

Guohui Zhao<sup>a,c</sup>, Wanyi Guan<sup>b,a</sup>, Li Cai<sup>a</sup> & Peng George Wang<sup>a\*</sup>

a Departments of Chemistry and Biochemistry, The Ohio State University, 484 W. 12th Ave., Columbus, OH 43210, USA.

b National Glycoengineering Research Center and The State Key Laboratory of Microbial Technology, Shandong University, Jinan, Shandong 250100, People's Republic of China.

c College of Pharmacy, Nankai University, Tianjin 300071, China

Correspondence should be addressed to P.G.W. (E-mail:wang.892@osu.edu)

**NMR, MS data and spectra for all new compounds**

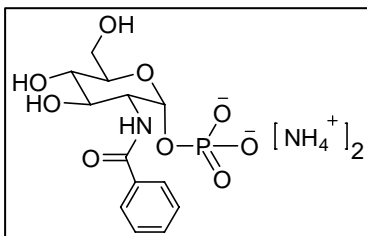

**2-benzamido-2-deoxy- $\alpha$ -D-glucosyl diammonium**

**Phosphate:**  $^1\text{H}$  NMR (400 MHz,  $\text{D}_2\text{O}$ )  $\delta$  7.88-7.90 (m, 2H), 7.56-7.69 (m, 3H), 5.58 (dd,  $J = 7.4, 3.3$  Hz, 1H), 4.23-4.26 (m, 1H), 3.94-4.06 (m, 3H), 3.86 (dd,  $J = 12.3, 4.7$  Hz, 1H), 3.63 (app t,  $J = 9.6$  Hz, 1H);  $^{13}\text{C}$  NMR (100 MHz,  $\text{D}_2\text{O}$ )  $\delta$  171.6, 133.6, 132.2, 128.7, 127.5, 93.2 (d), 72.5, 71.1, 70.0, 60.6, 54.6 (d);  $^{31}\text{P}$  NMR (162 MHz,  $\text{D}_2\text{O}$ )

$\delta$  0.71; HRMS (ESI) calcd for  $\text{C}_{13}\text{H}_{17}\text{NO}_9\text{P}$  (M-H) $^-$  362.0646, found 362.0643  $m/z$ .

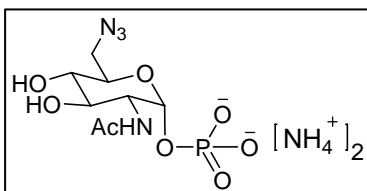

**2-Acetamido-6-azido-2,6-dideoxy- $\alpha$ -D-glucosyl diammonium**

**Phosphate:**  $^1\text{H}$  NMR (400 MHz,  $\text{D}_2\text{O}$ )  $\delta$  5.42 (dd,  $J = 7.2, 3.3$  Hz, 1H), 4.05-4.09 (m, 1H), 3.97-4.01 (m, 1H), 3.76-3.85 (m, 2H), 3.67 (dd,  $J = 13.6, 4.2$  Hz, 1H), 3.59 (app t,  $J = 9.3$  Hz, 1H), 2.10 (s, 3H);  $^{13}\text{C}$  NMR (100 MHz,  $\text{D}_2\text{O}$ )  $\delta$  174.7, 93.1 (d), 71.0, 70.9, 70.4, 54.0

(d), 50.8, 22.0;  $^{31}\text{P}$  NMR (162 MHz,  $\text{D}_2\text{O}$ )  $\delta$  0.60; HRMS (ESI) calcd for  $\text{C}_8\text{H}_{14}\text{N}_4\text{O}_8\text{P}$  (M-H) $^-$  325.0555, found 325.0559  $m/z$ .

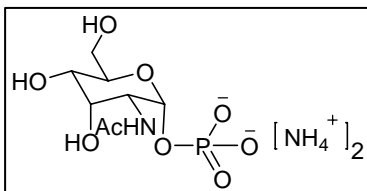

**2-Acetamido-2-deoxy- $\alpha$ -D-allosyl diammonium**

**Phosphate:**  $^1\text{H}$  NMR (400 MHz,  $\text{D}_2\text{O}$ )  $\delta$  5.39 (dd,  $J = 7.7, 3.6$  Hz, 1H), 4.02-4.13 (m, 3H), 3.94 (dd,  $J = 12.3, 2.3$  Hz, 1H), 3.79 (dd,  $J = 12.3, 5.3$  Hz, 1H), 3.70 (dd,  $J = 10.5, 3.4$  Hz, 1H), 2.09 (s, 3H);  $^{13}\text{C}$  NMR (100 MHz,  $\text{D}_2\text{O}$ )  $\delta$  174.1, 92.3 (d), 69.9, 67.3, 66.1, 60.9, 50.3 (d), 22.0;  $^{31}\text{P}$  NMR

(162 MHz,  $\text{D}_2\text{O}$ )  $\delta$  2.17; HRMS (ESI) calcd for  $\text{C}_8\text{H}_{15}\text{NO}_9\text{P}$  (M-H) $^-$  300.0490, found 300.0481  $m/z$ .

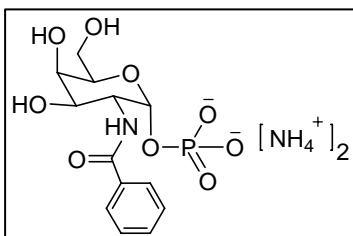

**2-benzamido-2-deoxy- $\alpha$ -D-galactopyranosyl diammonium**

**Phosphate:**  $^1\text{H}$  NMR (400 MHz,  $\text{D}_2\text{O}$ ):  $\delta$  = 7.83-7.86 (m, 2H), 7.61-7.66 (m, 1H), 7.52-7.56 (m, 2H), 5.59 (dd,  $J = 7.5, 3.5$  Hz, 1H), 4.45-4.49 (m, 1H), 4.23-4.26 (m, 1H), 4.09-4.15 (m, 2H), 3.77-3.83 (m, 2H);  $^{13}\text{C}$  NMR (125 MHz,  $\text{D}_2\text{O}$ ):  $\delta$  = 171.8, 133.6, 132.2, 128.7, 127.5, 93.6

(d), 71.7, 68.7, 67.7, 61.3, 50.7 (d);  $^{31}\text{P}$  NMR (162 MHz,  $\text{D}_2\text{O}$ ):  $\delta$  = -0.10; HRMS (ESI) calcd for  $\text{C}_{13}\text{H}_{17}\text{NO}_9\text{P}$  (M-H) $^-$  362.0646, found 362.0660  $m/z$ .

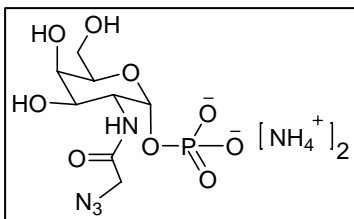

**2-Azidoacetamido-2-deoxy- $\alpha$ -D-galactopyranosyl diammonium Phosphate:**  $^1\text{H}$  NMR (400 MHz,  $\text{D}_2\text{O}$ ):  $\delta = 5.30$  (dd,  $J = 7.3, 3.3$  Hz, 1H), 4.06-4.10 (m, 1H), 3.86-4.00 (m, 4H), 3.81 (dd,  $J = 11.1, 3.0$  Hz, 1H), 3.53-3.61 (m, 2H);  $^{13}\text{C}$  NMR (100 MHz,  $\text{D}_2\text{O}$ ):  $\delta = 171.1, 93.4$  (d), 71.7, 68.4, 67.3, 61.1, 51.7, 50.1 (d);  $^{31}\text{P}$  NMR (162 MHz,  $\text{D}_2\text{O}$ ):  $\delta = -0.74$ ; HRMS (ESI) calcd for  $\text{C}_8\text{H}_{14}\text{N}_4\text{O}_9\text{P}$  (M-H) $^-$  341.0504, found 341.0498  $m/z$ .

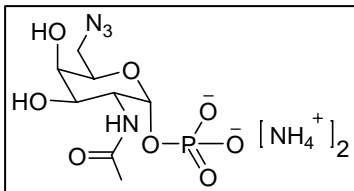

**2-Acetamido-6-azido-2,6-dideoxy- $\alpha$ -D-galactopyranosyl diammonium Phosphate:**  $^1\text{H}$  NMR (400 MHz,  $\text{D}_2\text{O}$ ):  $\delta = 5.42$  (dd,  $J = 7.3, 3.2$  Hz, 1H), 4.25 (app t,  $J = 6.6$ , 1H), 4.18-4.21 (m, 1H), 3.95-4.03 (m, 2H), 3.58-3.63 (m, 1H), 3.50-3.54 (m, 1H), 2.07 (s, 3H);  $^{13}\text{C}$  NMR (100 MHz,  $\text{D}_2\text{O}$ ):  $\delta = 174.9, 93.3$  (d), 69.5, 68.6, 67.8, 50.5, 50.0 (d), 22.1;  $^{31}\text{P}$  NMR (162 MHz,  $\text{D}_2\text{O}$ ):  $\delta = 0.58$ ; HRMS (ESI) calcd for  $\text{C}_8\text{H}_{14}\text{N}_4\text{O}_8\text{P}$  (M-H) $^-$  325.0555, found 325.0566  $m/z$ .

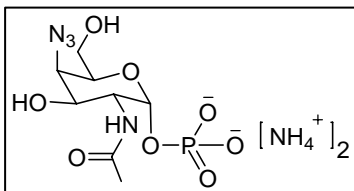

**2-Acetamido-4-azido-2,4-dideoxy- $\alpha$ -D-galactopyranosyl diammonium Phosphate:**  $^1\text{H}$  NMR (400 MHz,  $\text{D}_2\text{O}$ ):  $\delta = 5.43$  (dd,  $J = 7.4, 3.0$  Hz, 1H), 4.22-4.27 (m, 3H), 4.15-4.16 (m, 1H), 3.75-3.78 (m, 2H), 2.06 (s, 3H);  $^{13}\text{C}$  NMR (100 MHz,  $\text{D}_2\text{O}$ ):  $\delta = 174.8, 93.4$  (d), 70.1, 67.8, 62.8, 61.1, 50.2 (d), 22.0;  $^{31}\text{P}$  NMR (162 MHz,  $\text{D}_2\text{O}$ ):  $\delta = -0.95$ ; HRMS (ESI) calcd for  $\text{C}_8\text{H}_{14}\text{N}_4\text{O}_8\text{P}$  (M-H) $^-$  325.0555, found 325.0542  $m/z$ .

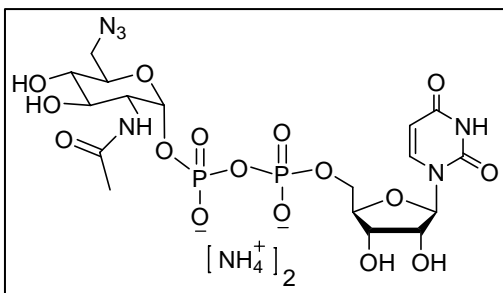

**Uridine 5'-diphospho-2-acetamido-6-azido-2,6-dideoxy- $\alpha$ -D-glucopyranose diammonium salt:**  $^1\text{H}$  NMR (400 MHz,  $\text{D}_2\text{O}$ ):  $\delta = 7.98$  (d,  $J = 8.1$  Hz, 1H), 5.97-5.99 (m, 2H), 5.51 (dd,  $J = 7.2, 3.3$  Hz, 1H), 4.36-4.40 (m, 2H), 4.20-4.30 (m, 3H), 4.00-4.09 (m, 2H), 3.81 (t,  $J = 9.2$  Hz, 1H), 3.74 (dd,  $J = 13.5, 2.5$  Hz, 1H), 3.57-3.65 (m, 2H), 2.08 (s, 3H);  $^{31}\text{P}$  NMR (162 MHz,  $\text{D}_2\text{O}$ ):  $\delta = -11.3$  (d,  $J = 21.4$  Hz),  $-13.2$  (d,  $J = 21.4$  Hz); HRMS (ESI) calcd for  $\text{C}_{17}\text{H}_{25}\text{N}_6\text{O}_{16}\text{P}_2$  (M-H) $^-$  631.0808, found 631.0806  $m/z$ .

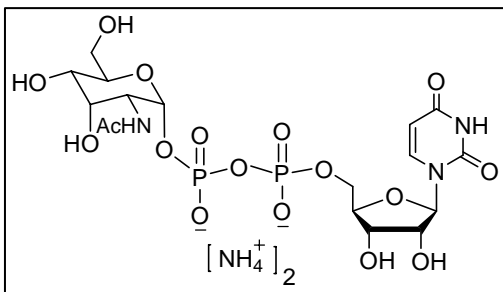

**Uridine 5'-diphospho-2-acetamido-2-deoxy- $\alpha$ -D-allopyranose diammonium salt:**  $^1\text{H}$  NMR (400 MHz,  $\text{D}_2\text{O}$ ):  $\delta = 7.96$  (d,  $J = 8.1$  Hz, 1H), 5.96-6.00 (m, 2H), 5.53 (dd,  $J = 7.1, 3.8$  Hz, 1H), 4.36-4.40 (m, 2H), 4.21-4.30 (m, 3H), 4.08-4.15 (m, 3H), 3.92 (dd,  $J = 12.6, 2.3$  Hz, 1H), 3.82 (dd,  $J = 12.6, 4.5$  Hz, 1H), 3.77 (dd,  $J = 10.5, 3.2$  Hz, 1H), 2.10 (s, 3H);  $^{31}\text{P}$  NMR (162

MHz,  $\text{D}_2\text{O}$ ):  $\delta = -11.0$  (d,  $J = 19.9$  Hz),  $-13.0$  (d,  $J = 21.7$  Hz); HRMS (ESI) calcd for  $\text{C}_{17}\text{H}_{26}\text{N}_3\text{O}_{17}\text{P}_2$  (M-H) $^-$  606.0743, found 606.0730  $m/z$ .

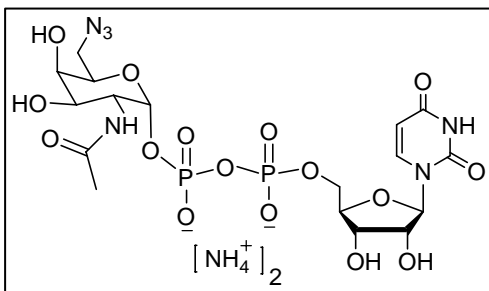

**Uridine 5'-diphospho-2-acetamido-6-azido-2,6-dideoxy- $\alpha$ -D-galactopyranose diammonium salt:**  $^1\text{H}$  NMR (400 MHz,  $\text{D}_2\text{O}$ ):  $\delta = 7.98$  (d,  $J = 8.2$  Hz, 1H), 5.97-5.99 (m, 2H), 5.54 (dd,  $J = 7.2, 3.4$  Hz, 1H), 4.35-4.39 (m, 2H), 4.19-4.30 (m, 5H), 4.02 (m, 1H), 3.98 (dd,  $J = 10.8, 3.2$  Hz, 1H), 3.60 (dd,  $J = 12.8, 7.2$  Hz, 1H), 3.50 (dd,  $J = 12.8, 6.0$  Hz, 1H), 2.09 (s, 3H);  $^{31}\text{P}$  NMR (162

MHz,  $\text{D}_2\text{O}$ ):  $\delta = -11.2$  (d,  $J = 21.5$  Hz),  $-13.0$  (d,  $J = 21.5$  Hz); HRMS (ESI) calcd for  $\text{C}_{17}\text{H}_{25}\text{N}_6\text{O}_{16}\text{P}_2$  (M-H) $^-$  631.0808, found 631.0801  $m/z$ .

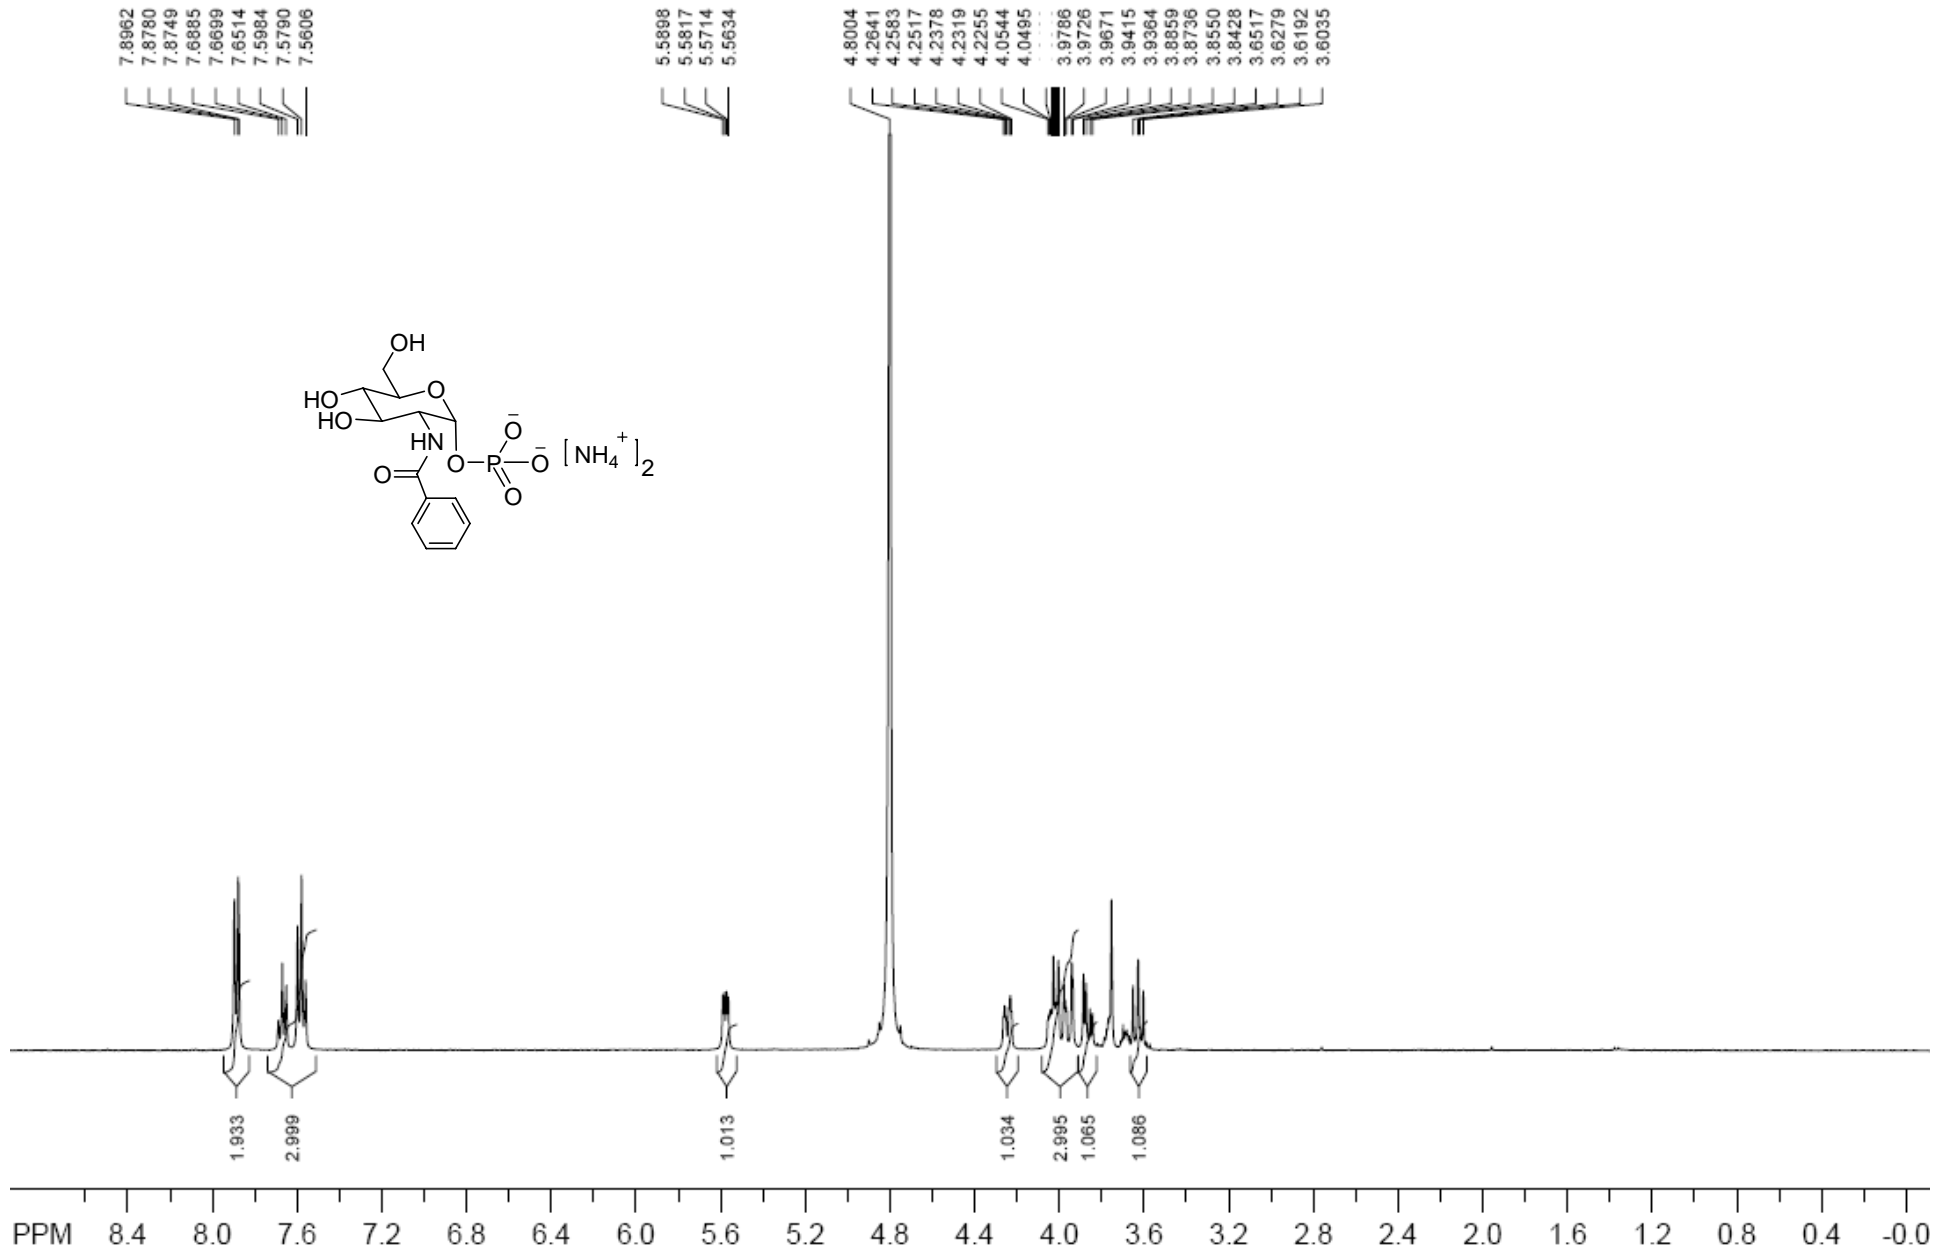

S5

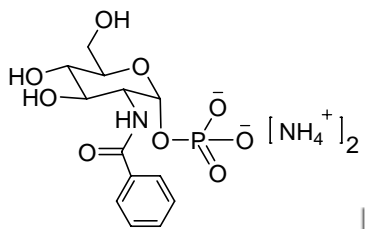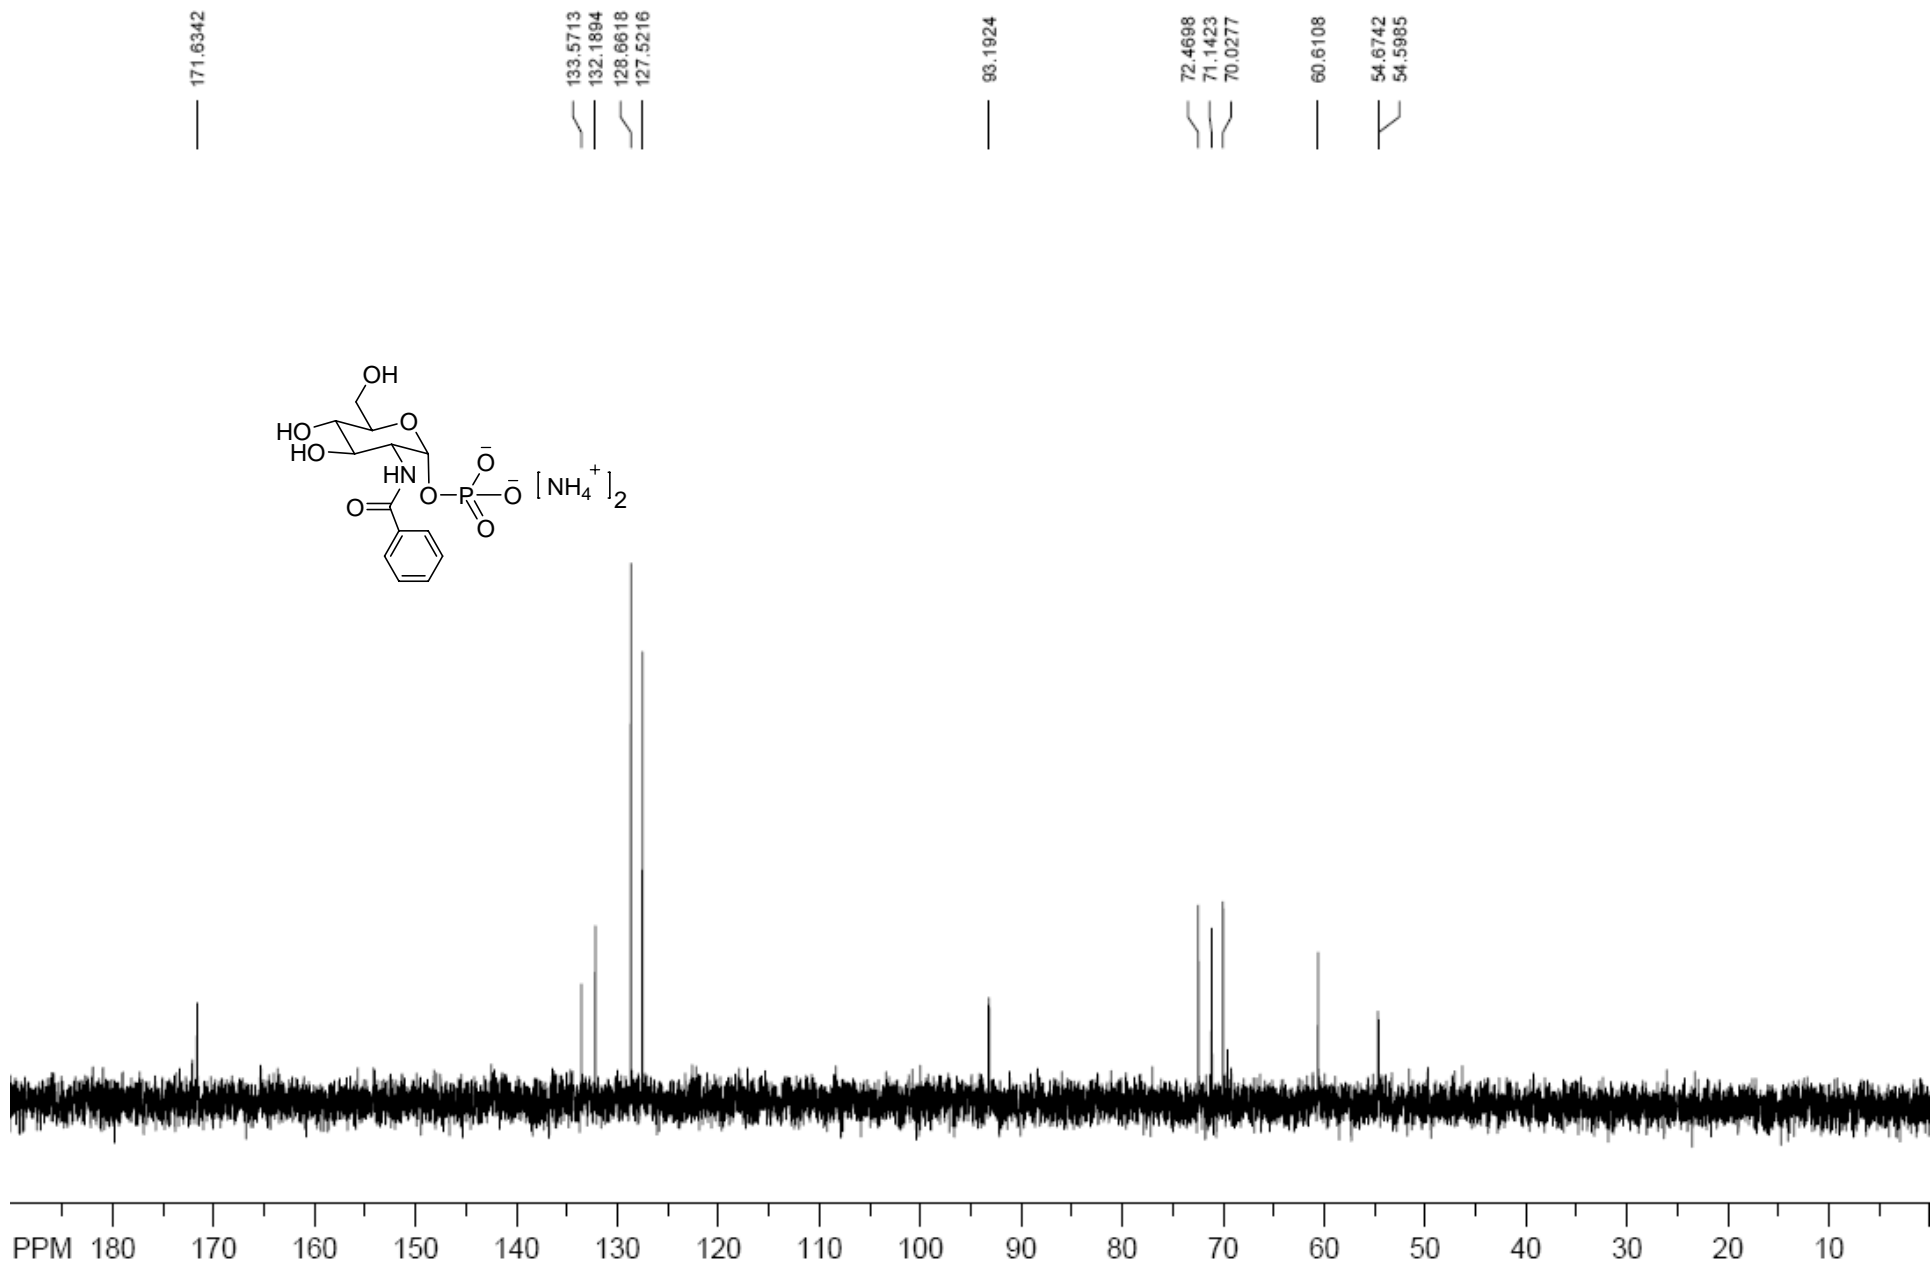

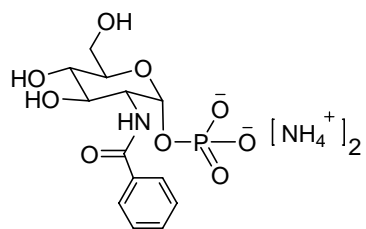

0.7087

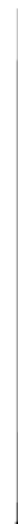

PPM 65 55 45 35 25 15 5 -5 -15 -25 -35 -45 -55 -65

S5

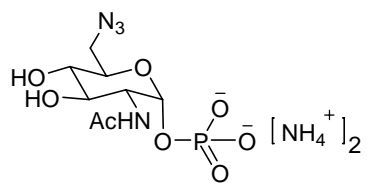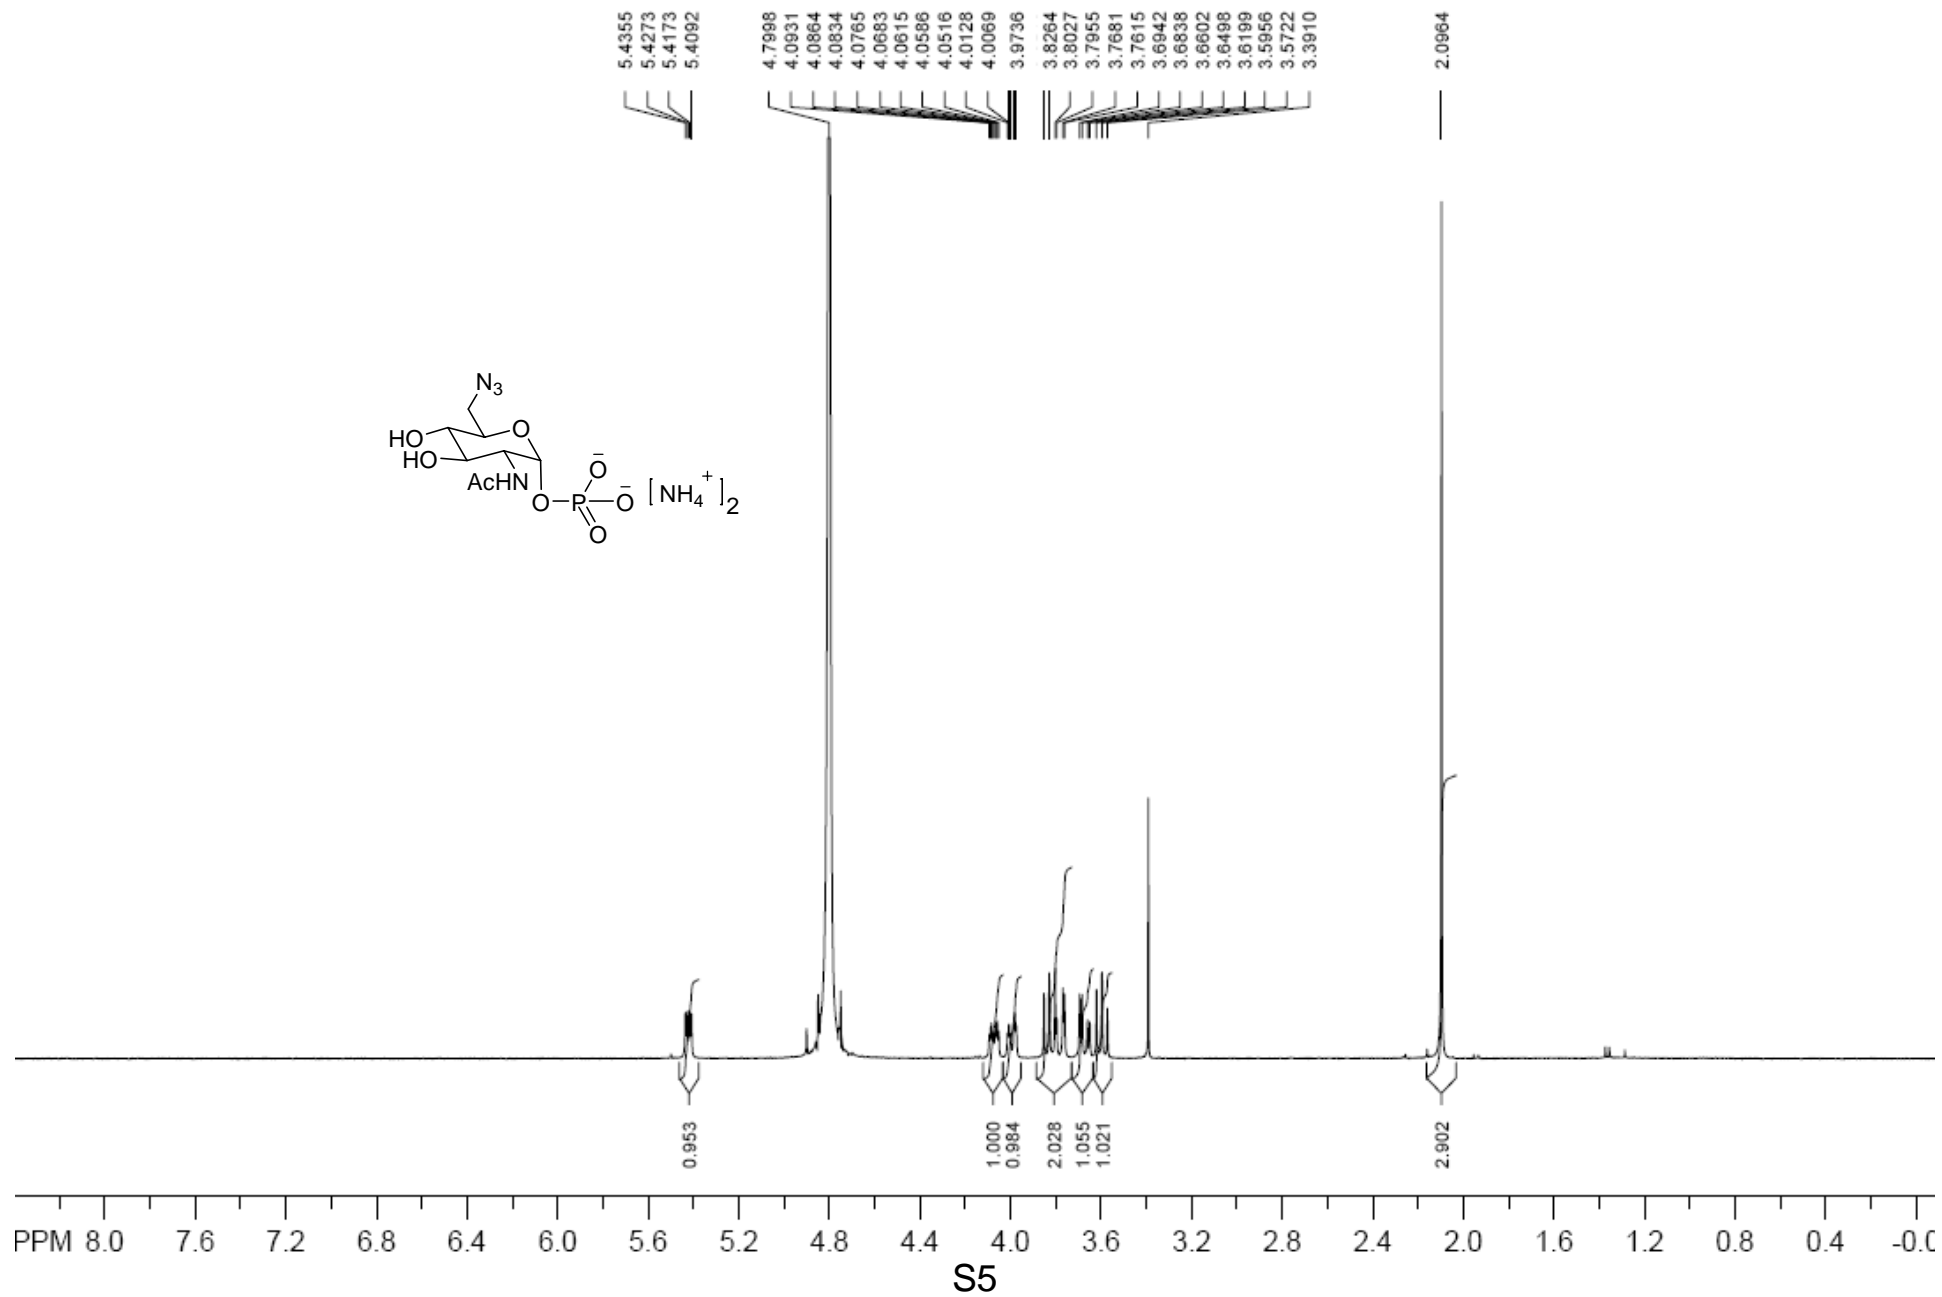



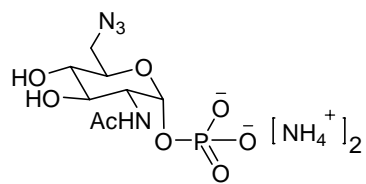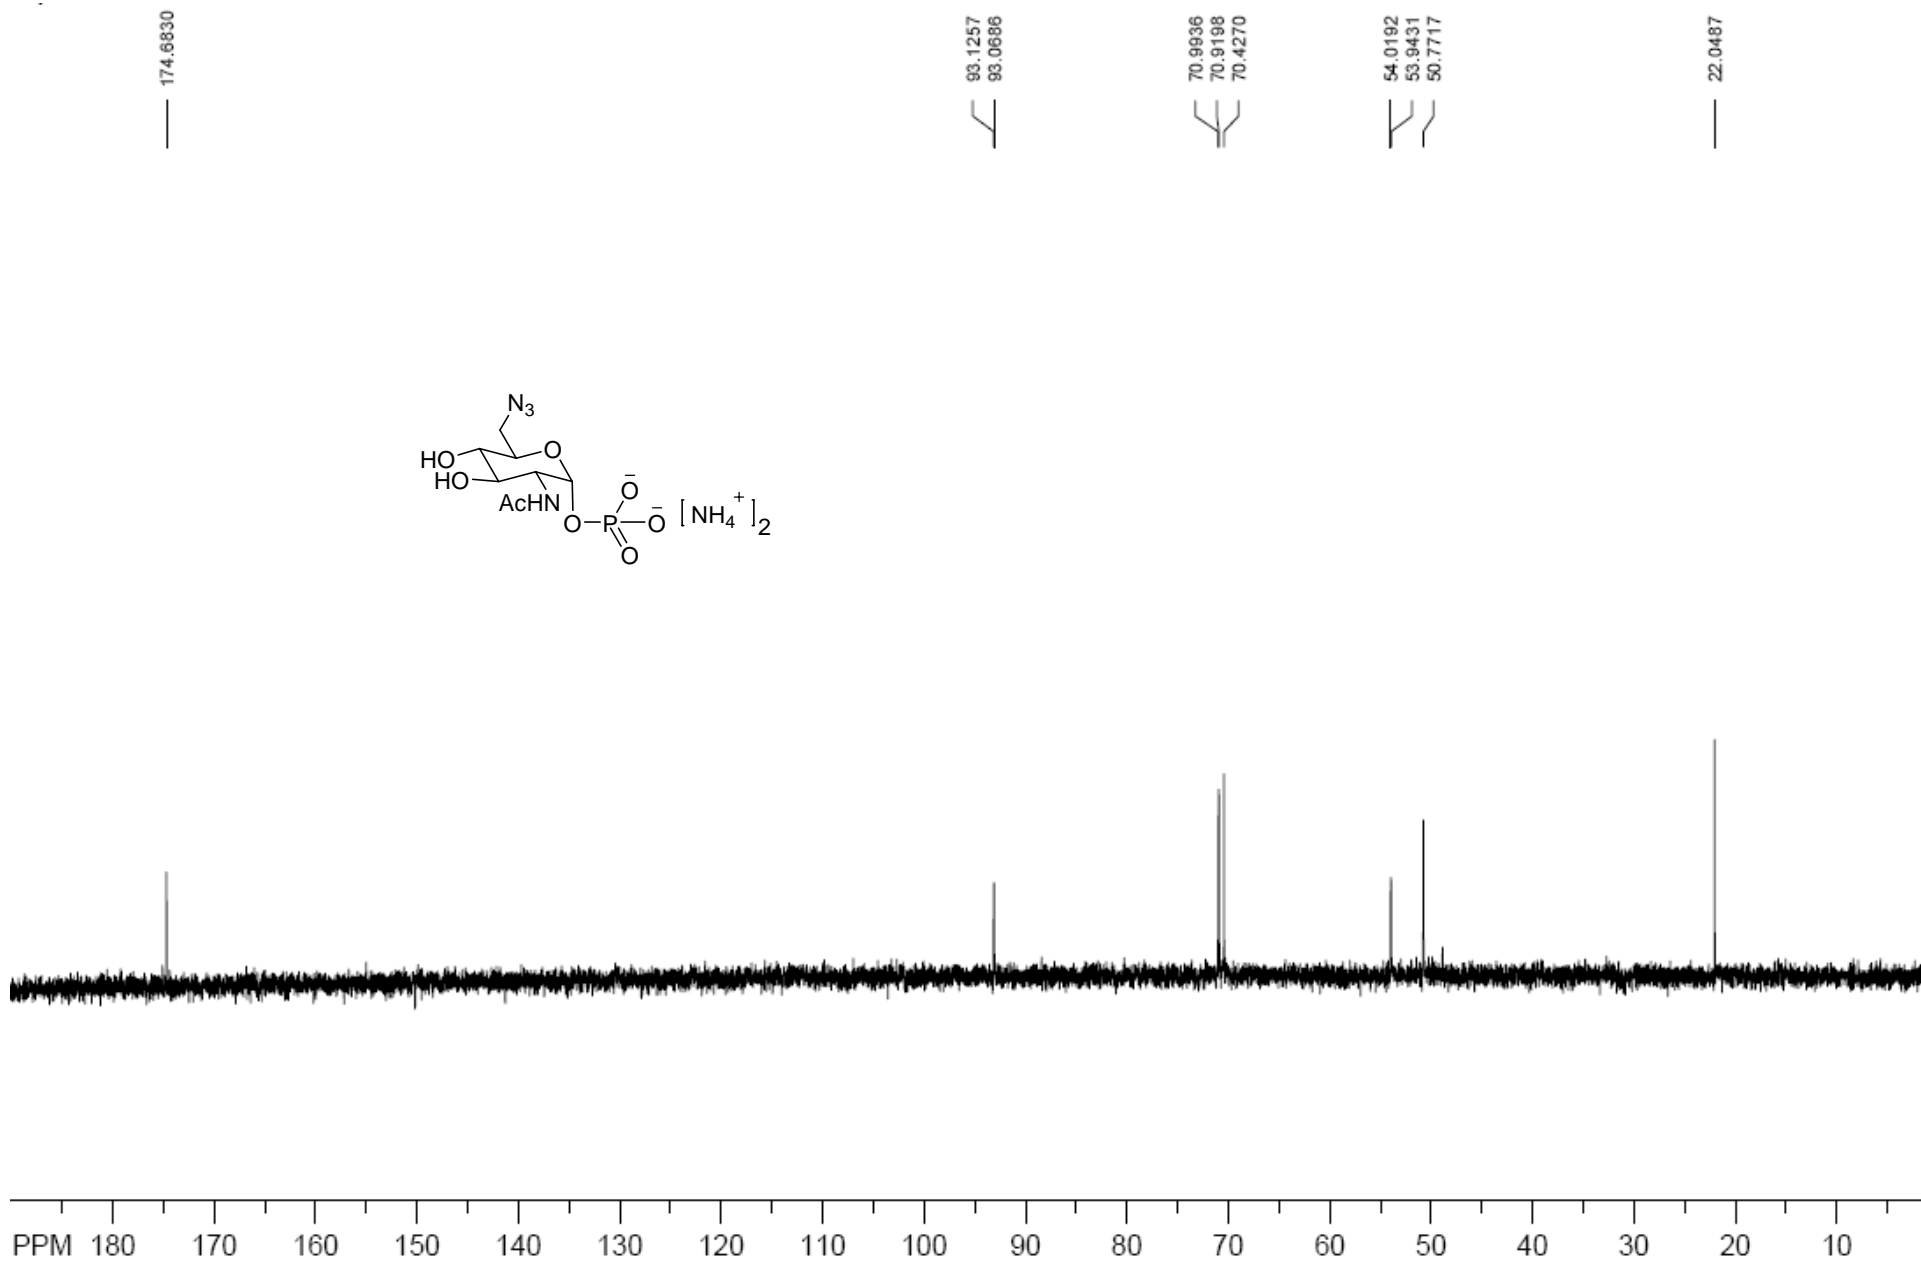

S5

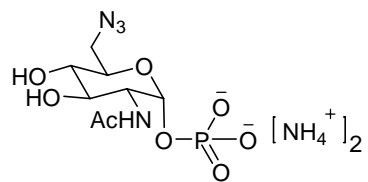

0.6009

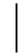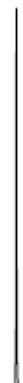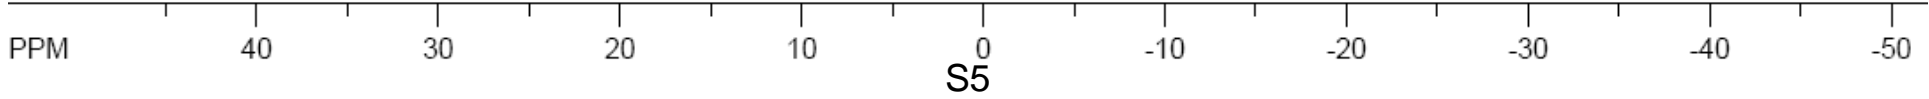

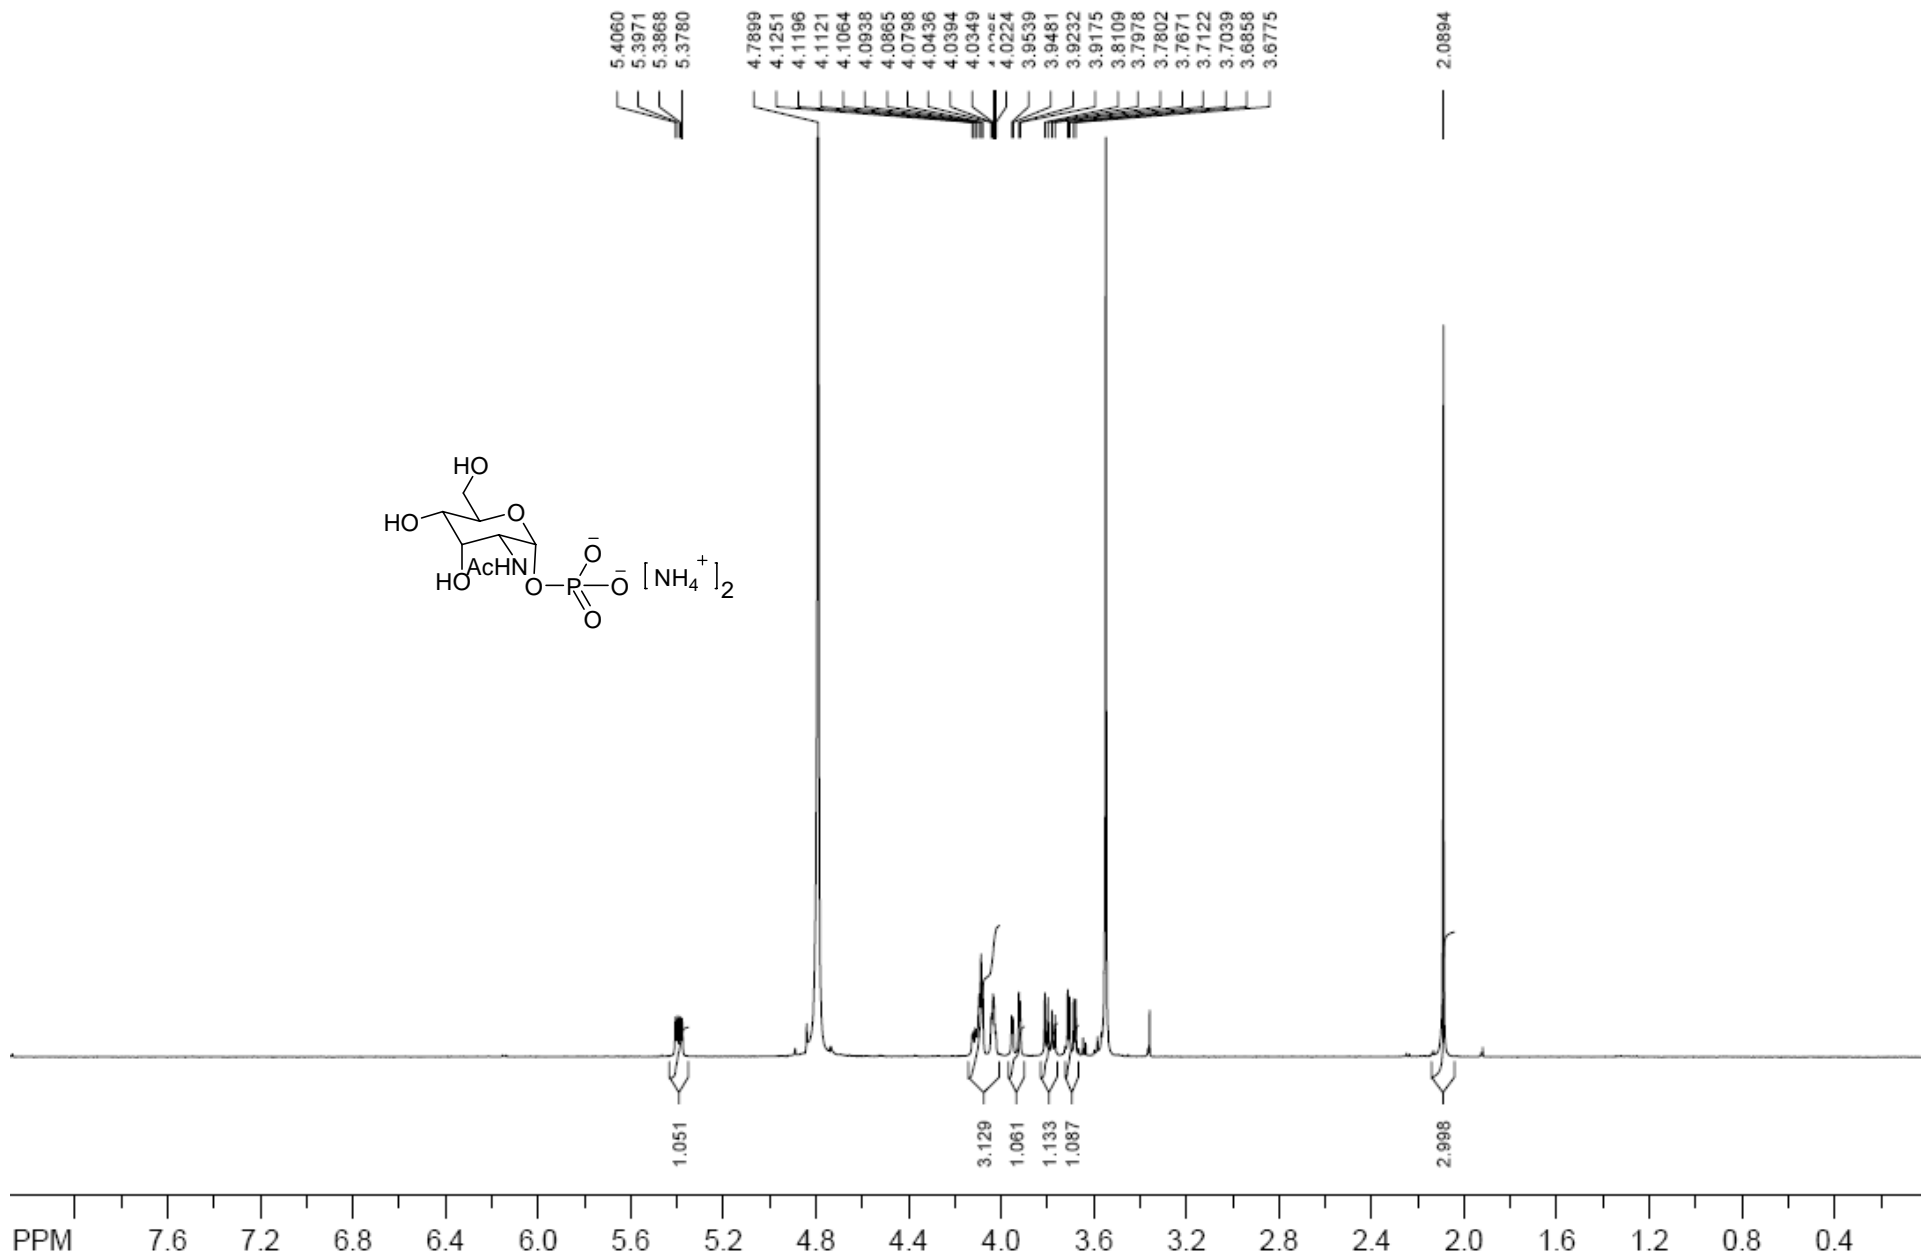

S5

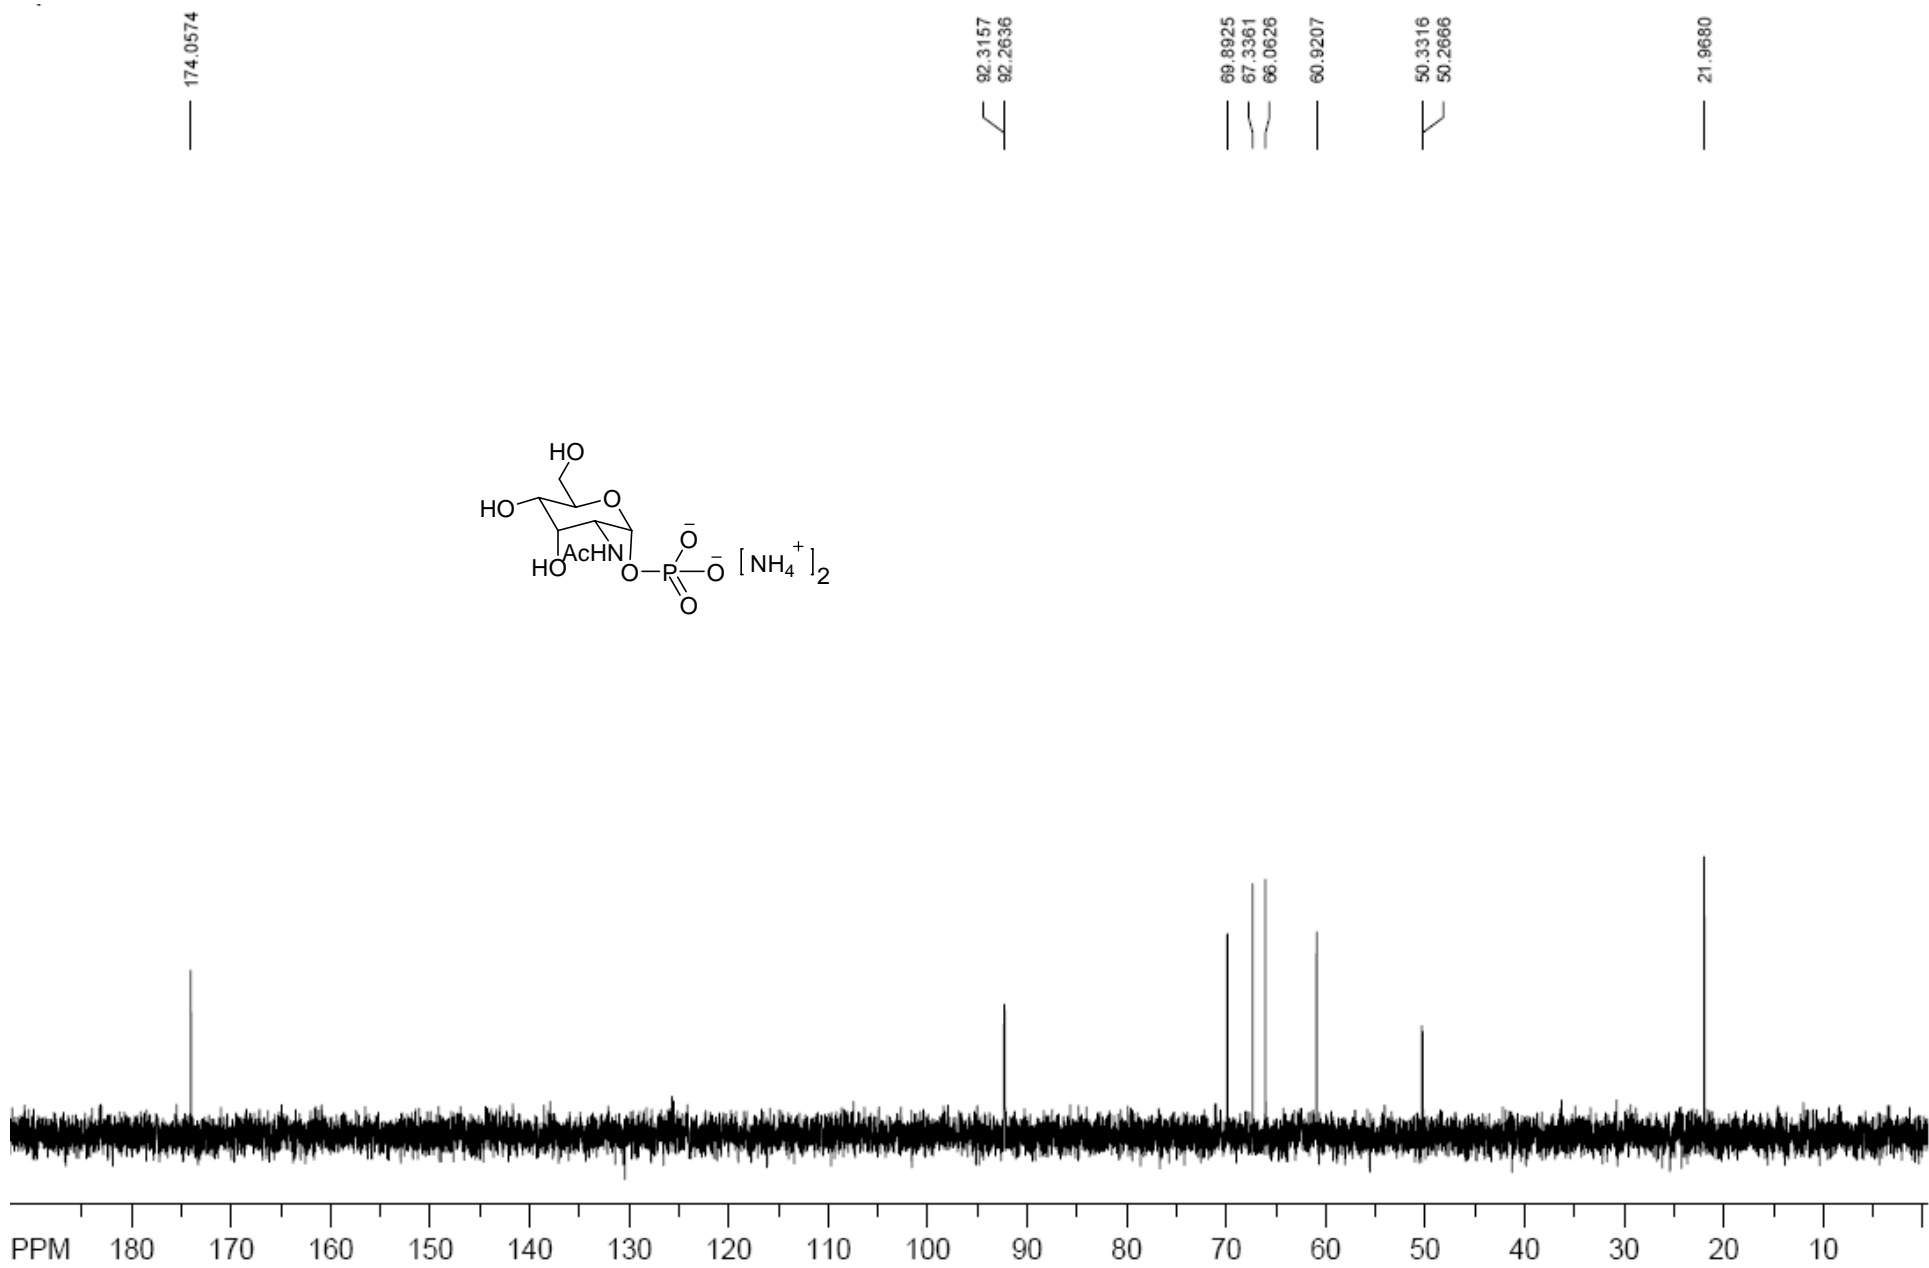

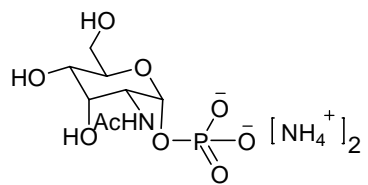

2.1664

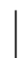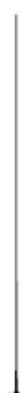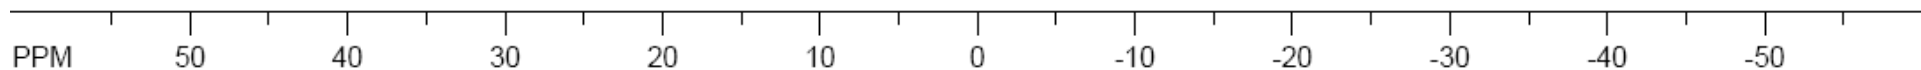

S5

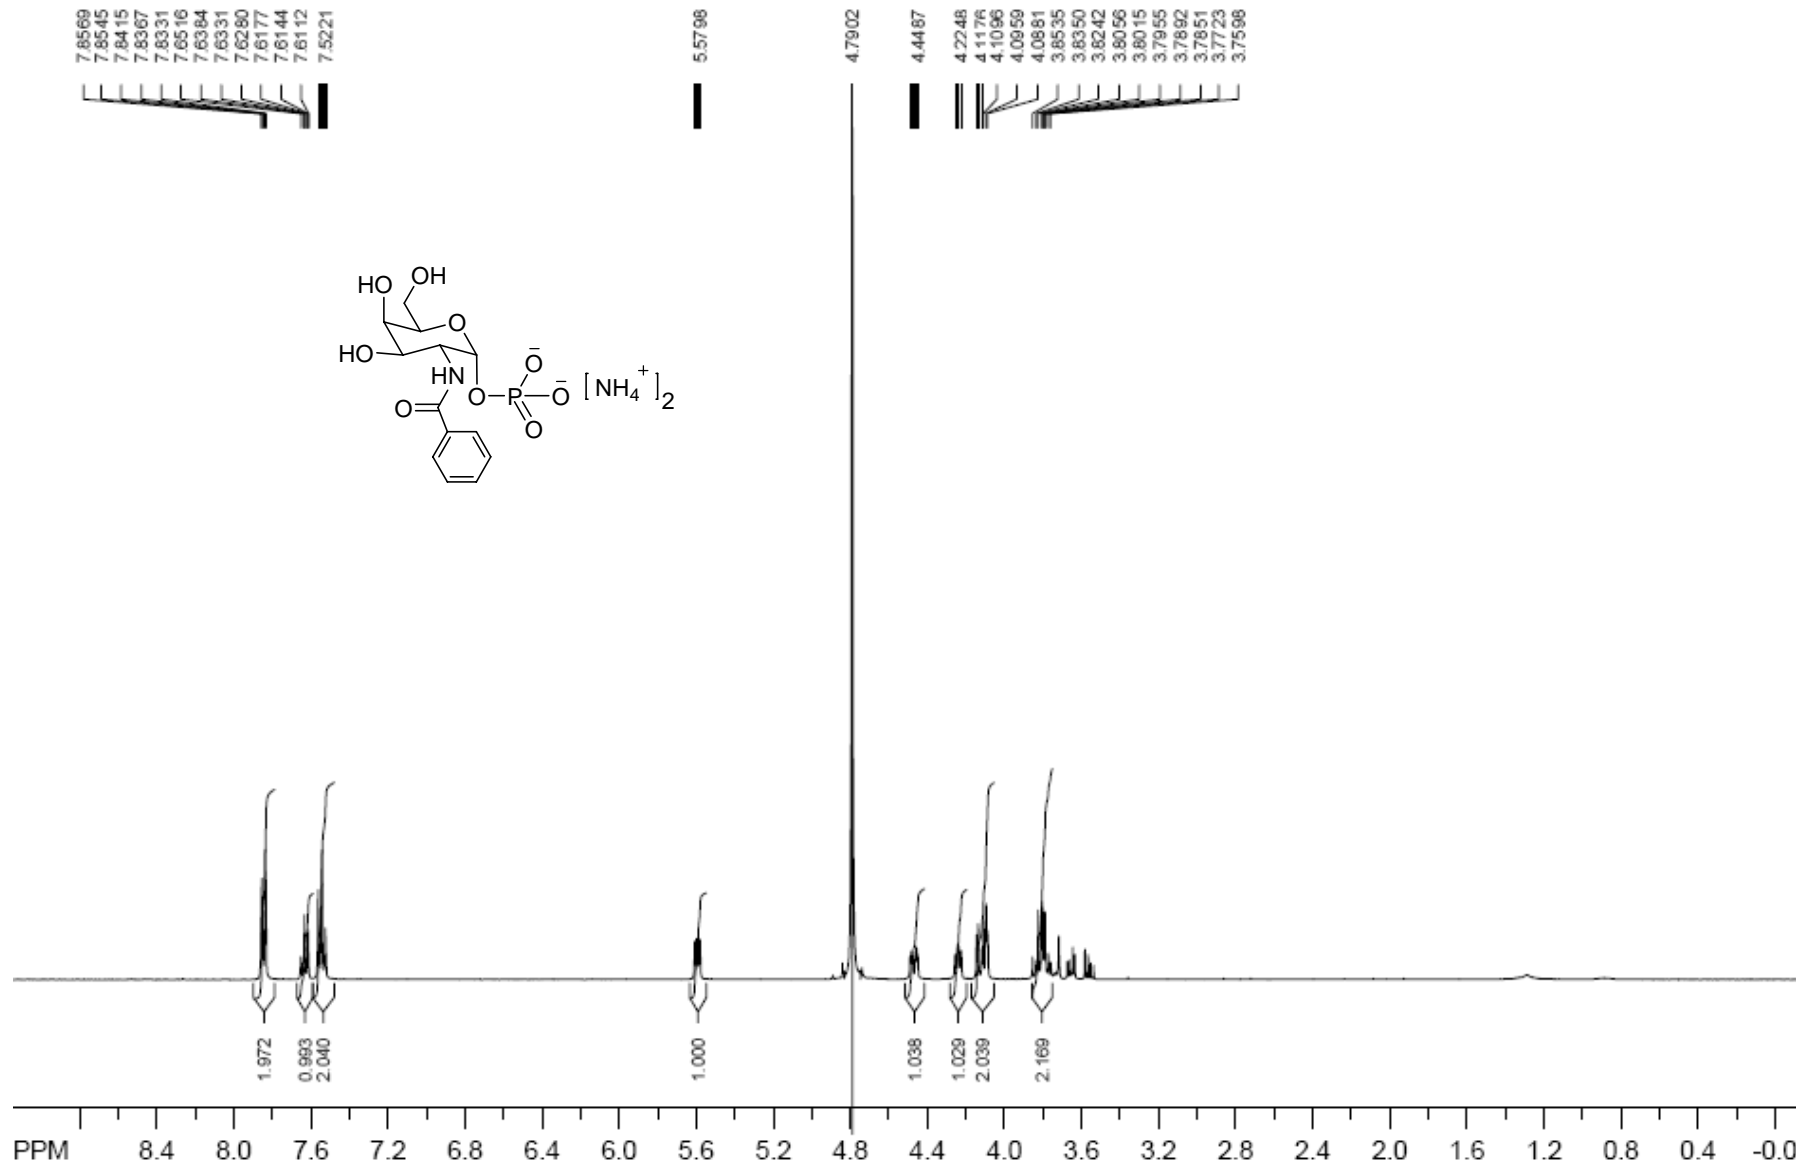

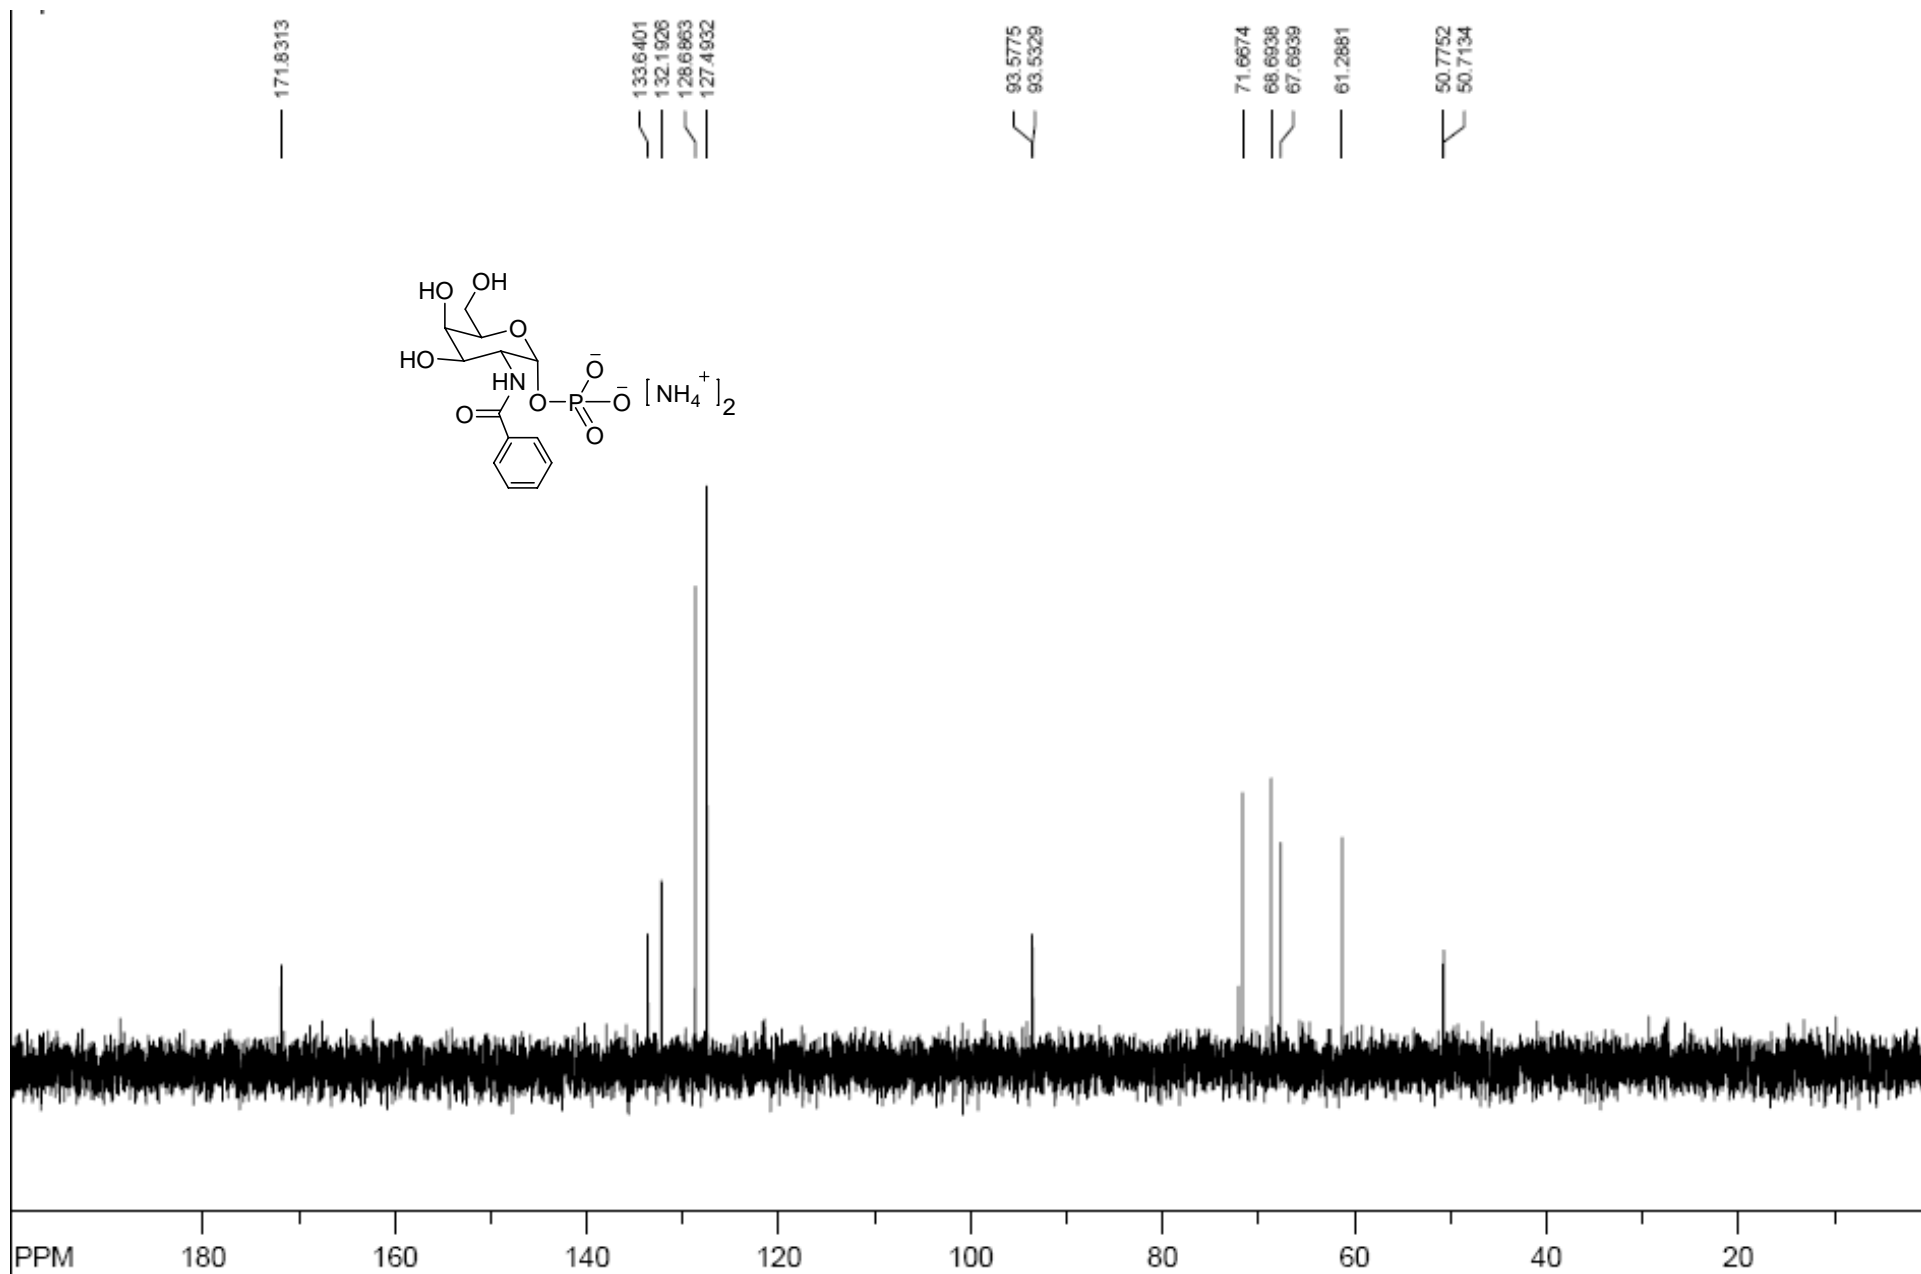

S5

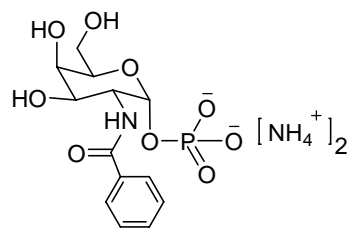

-0.0985

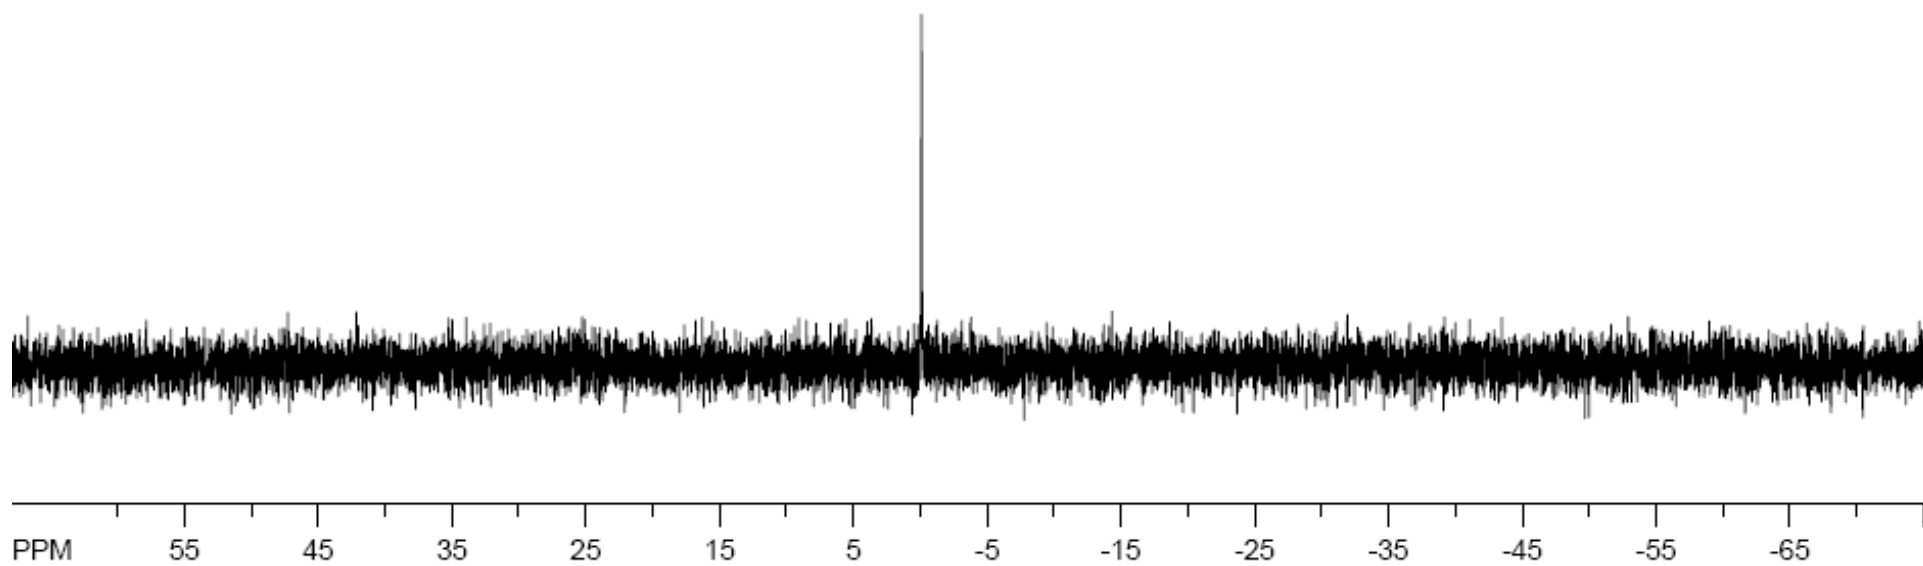

S5



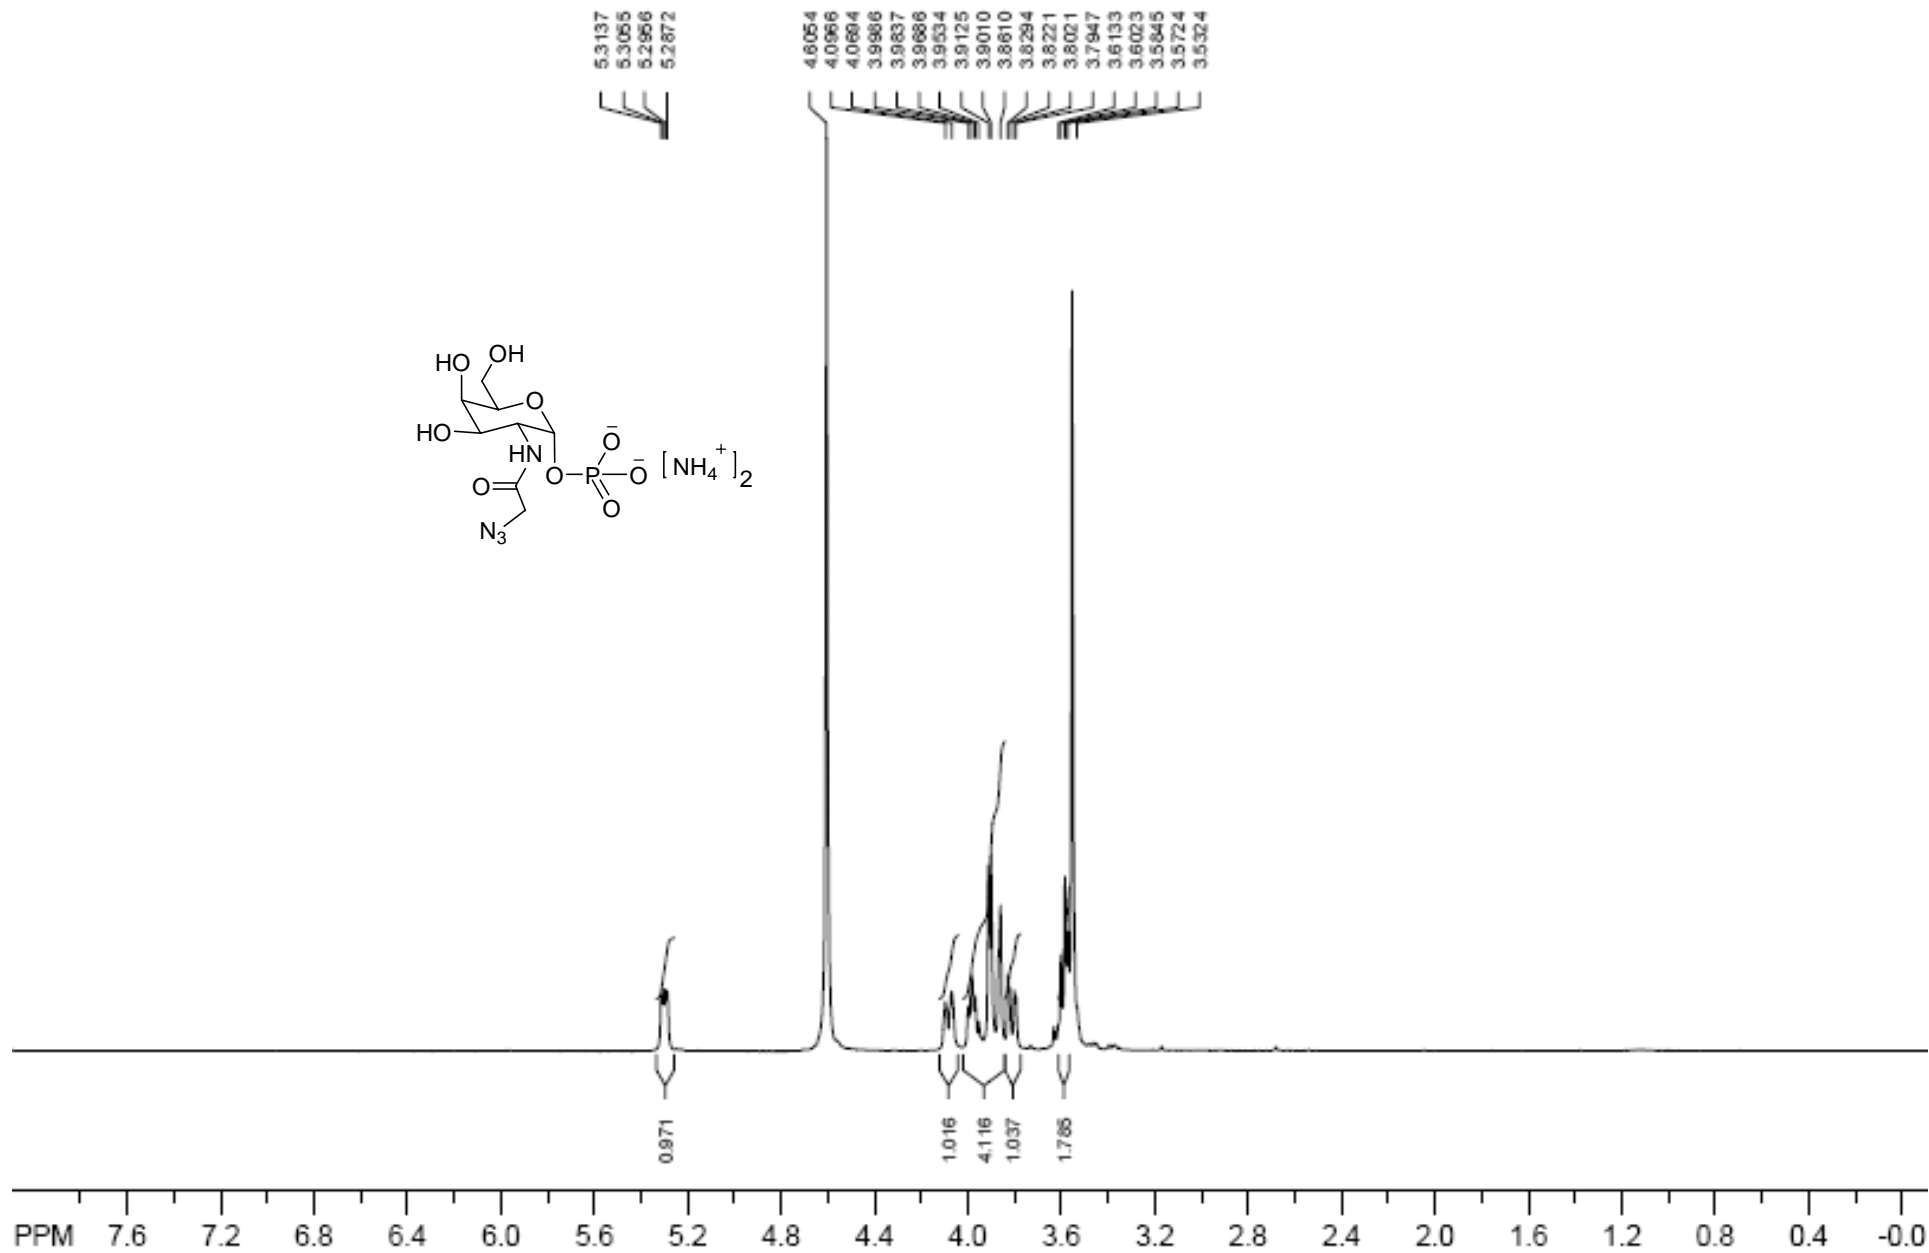

S5

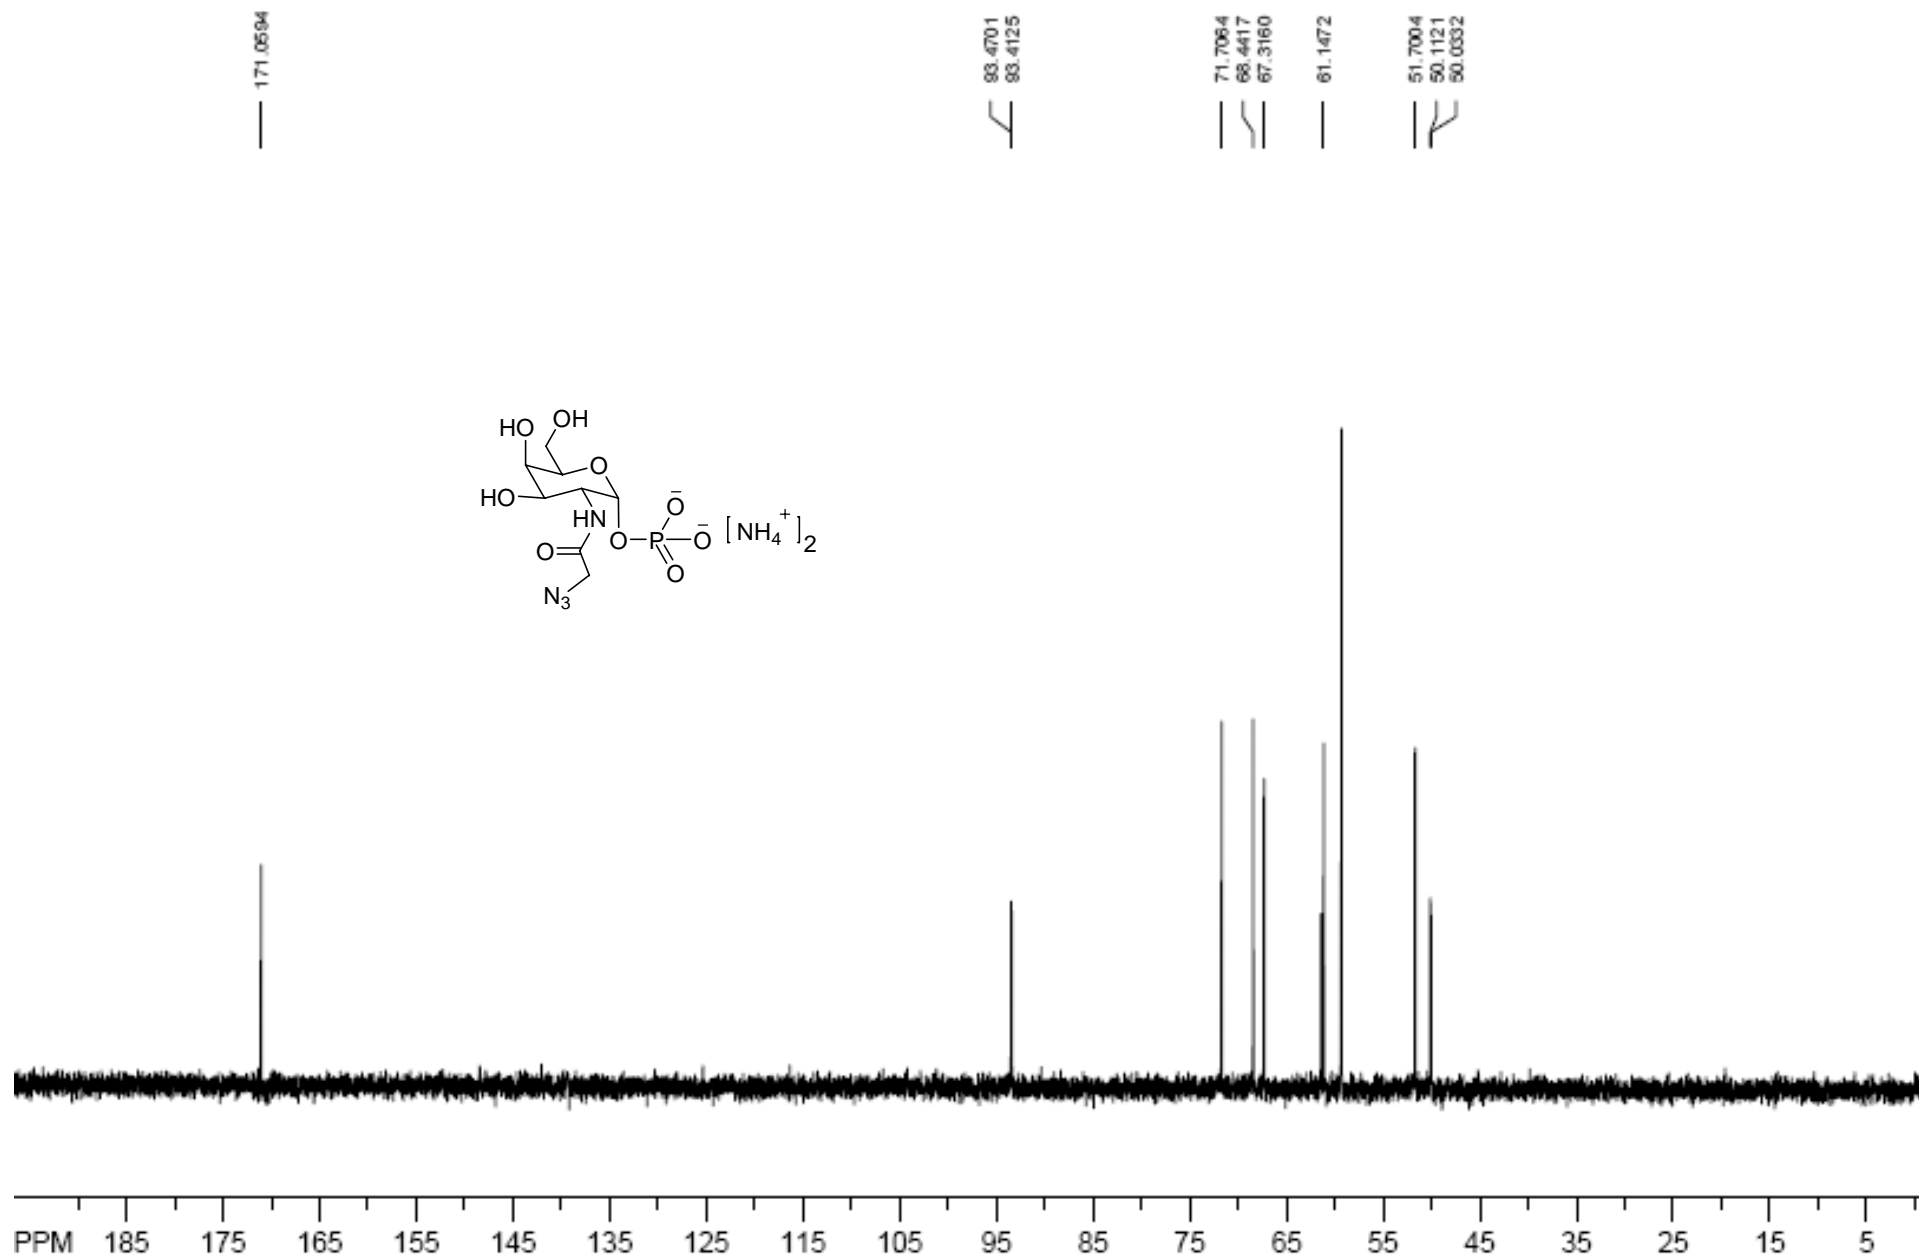

S5

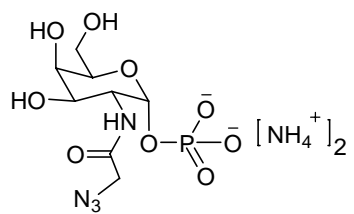

-0.7352

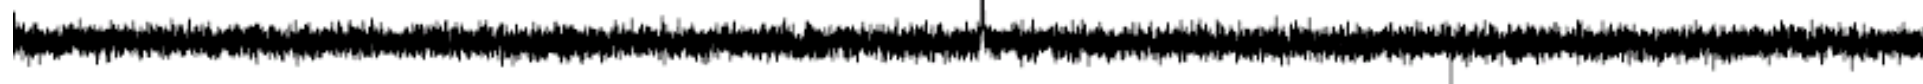

PPM 80 60 40 20 0 -20 -40 -60 -80

S5

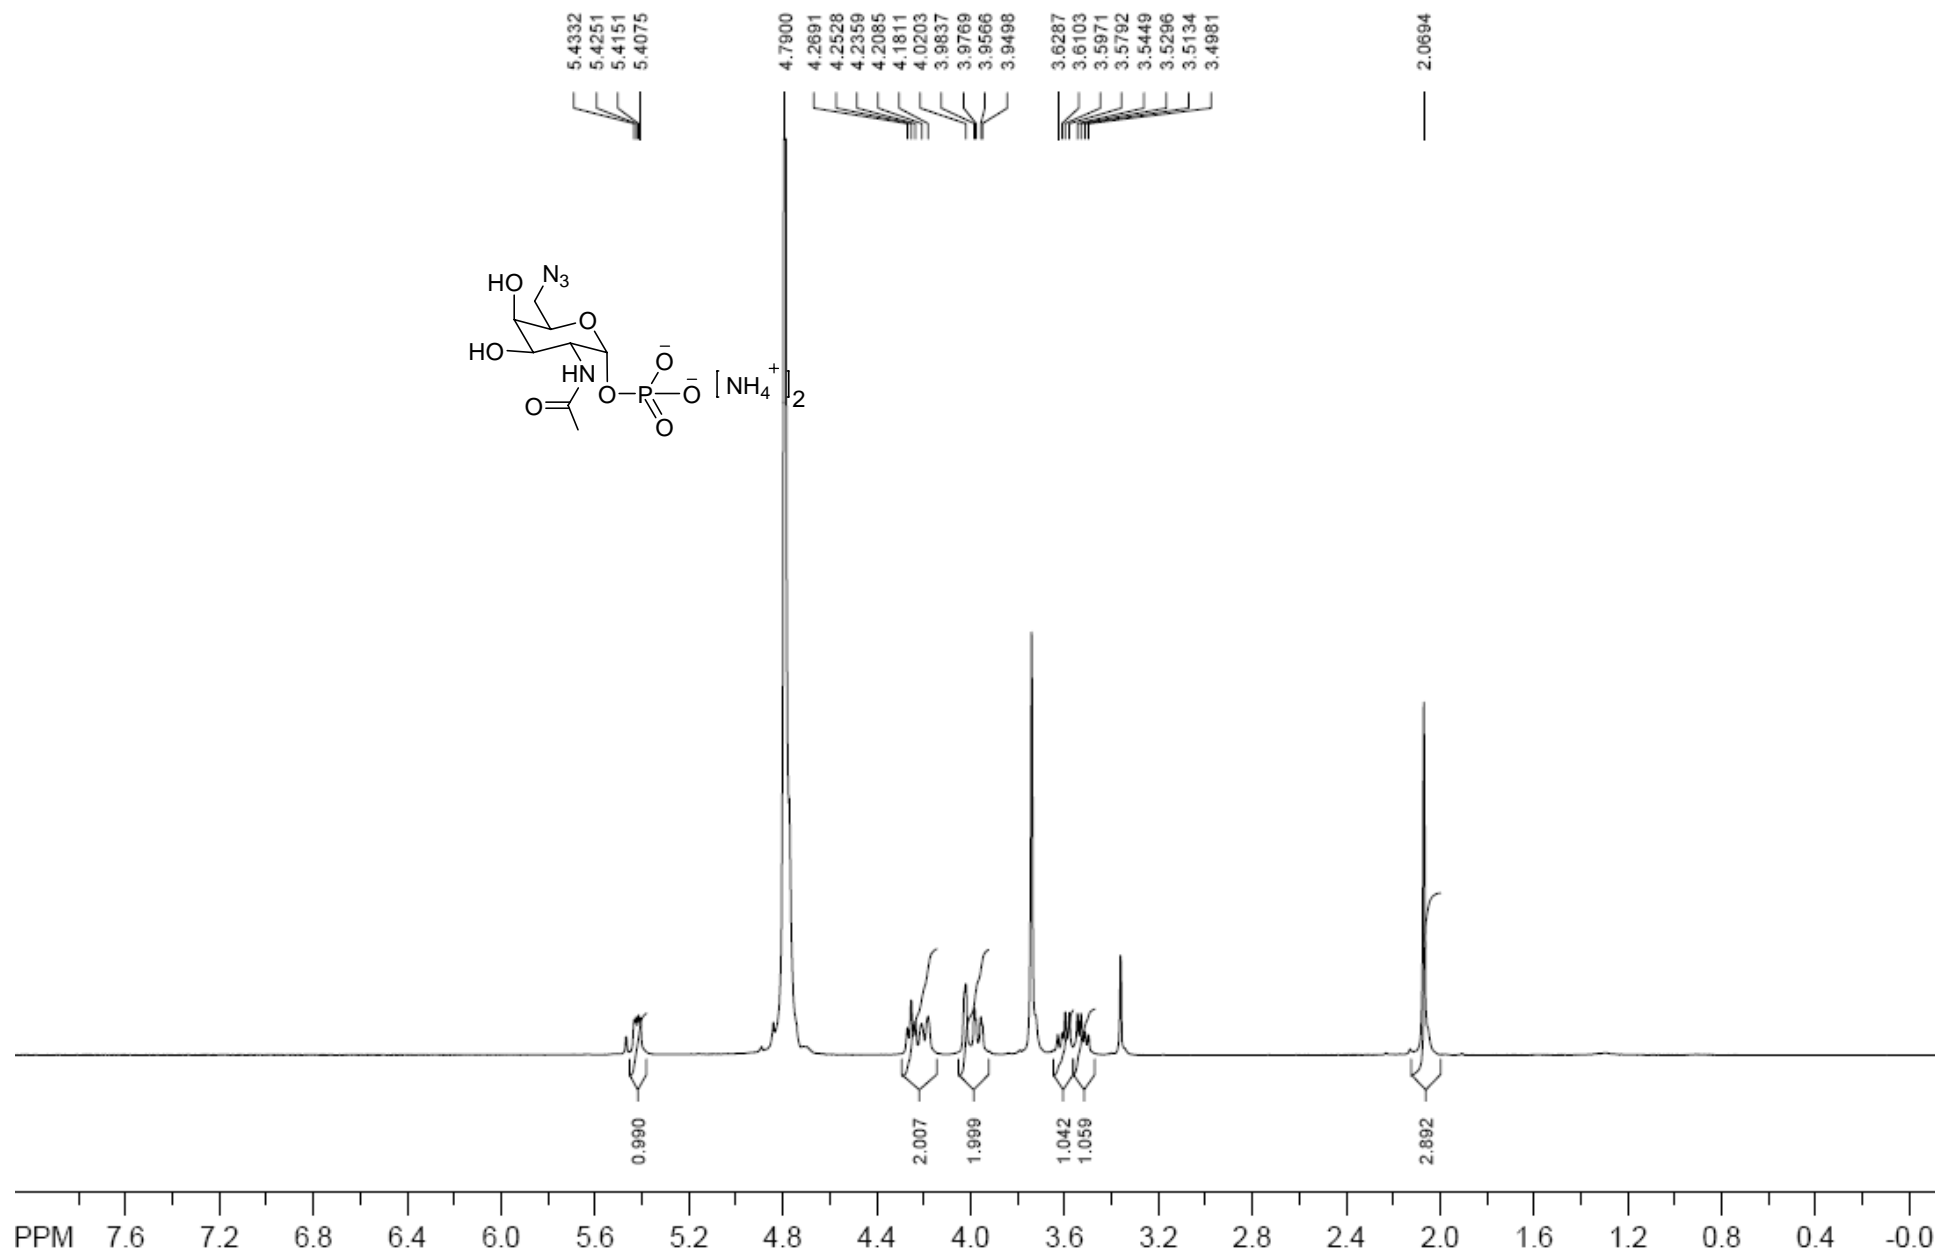

S5

174.8994

93.3398  
93.2839

69.5111  
68.6074  
67.7520

50.5309  
50.0567  
49.9813

22.1210

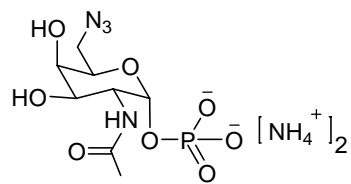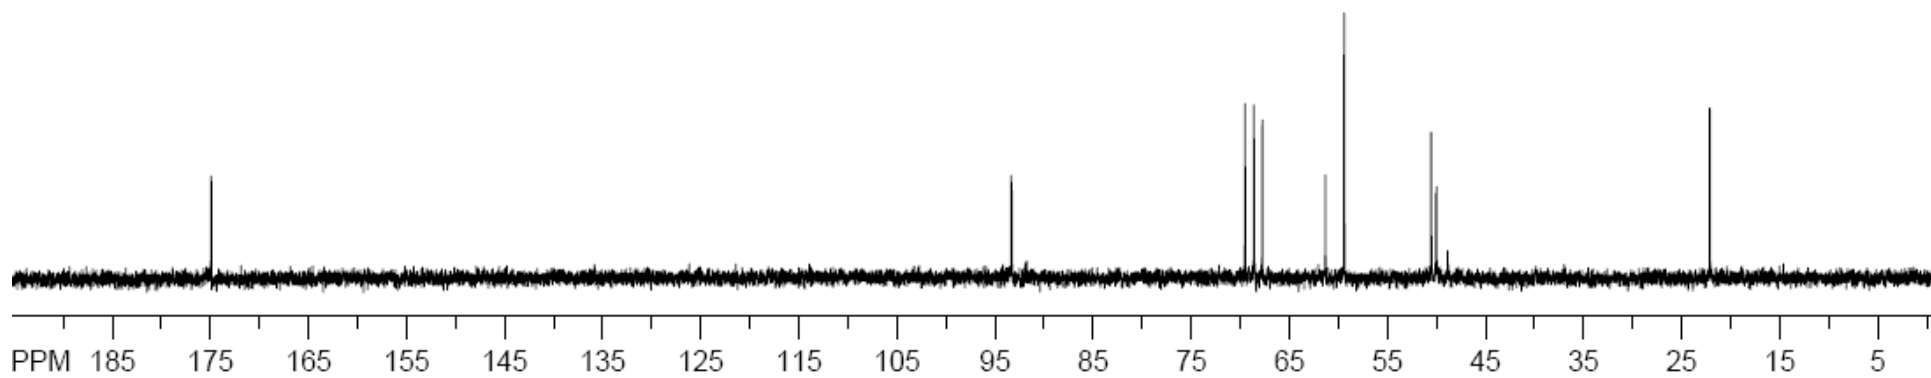

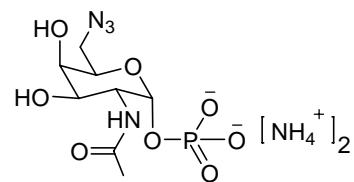

0.5813

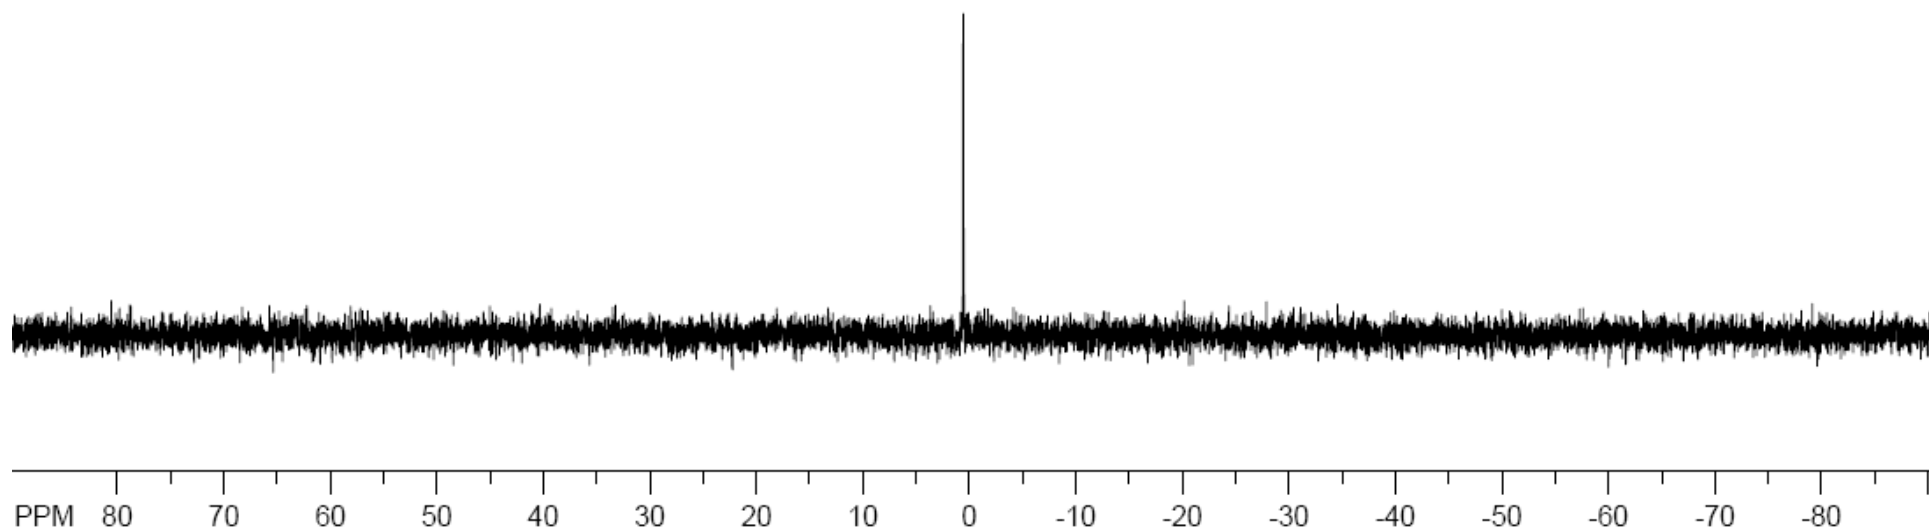

S5

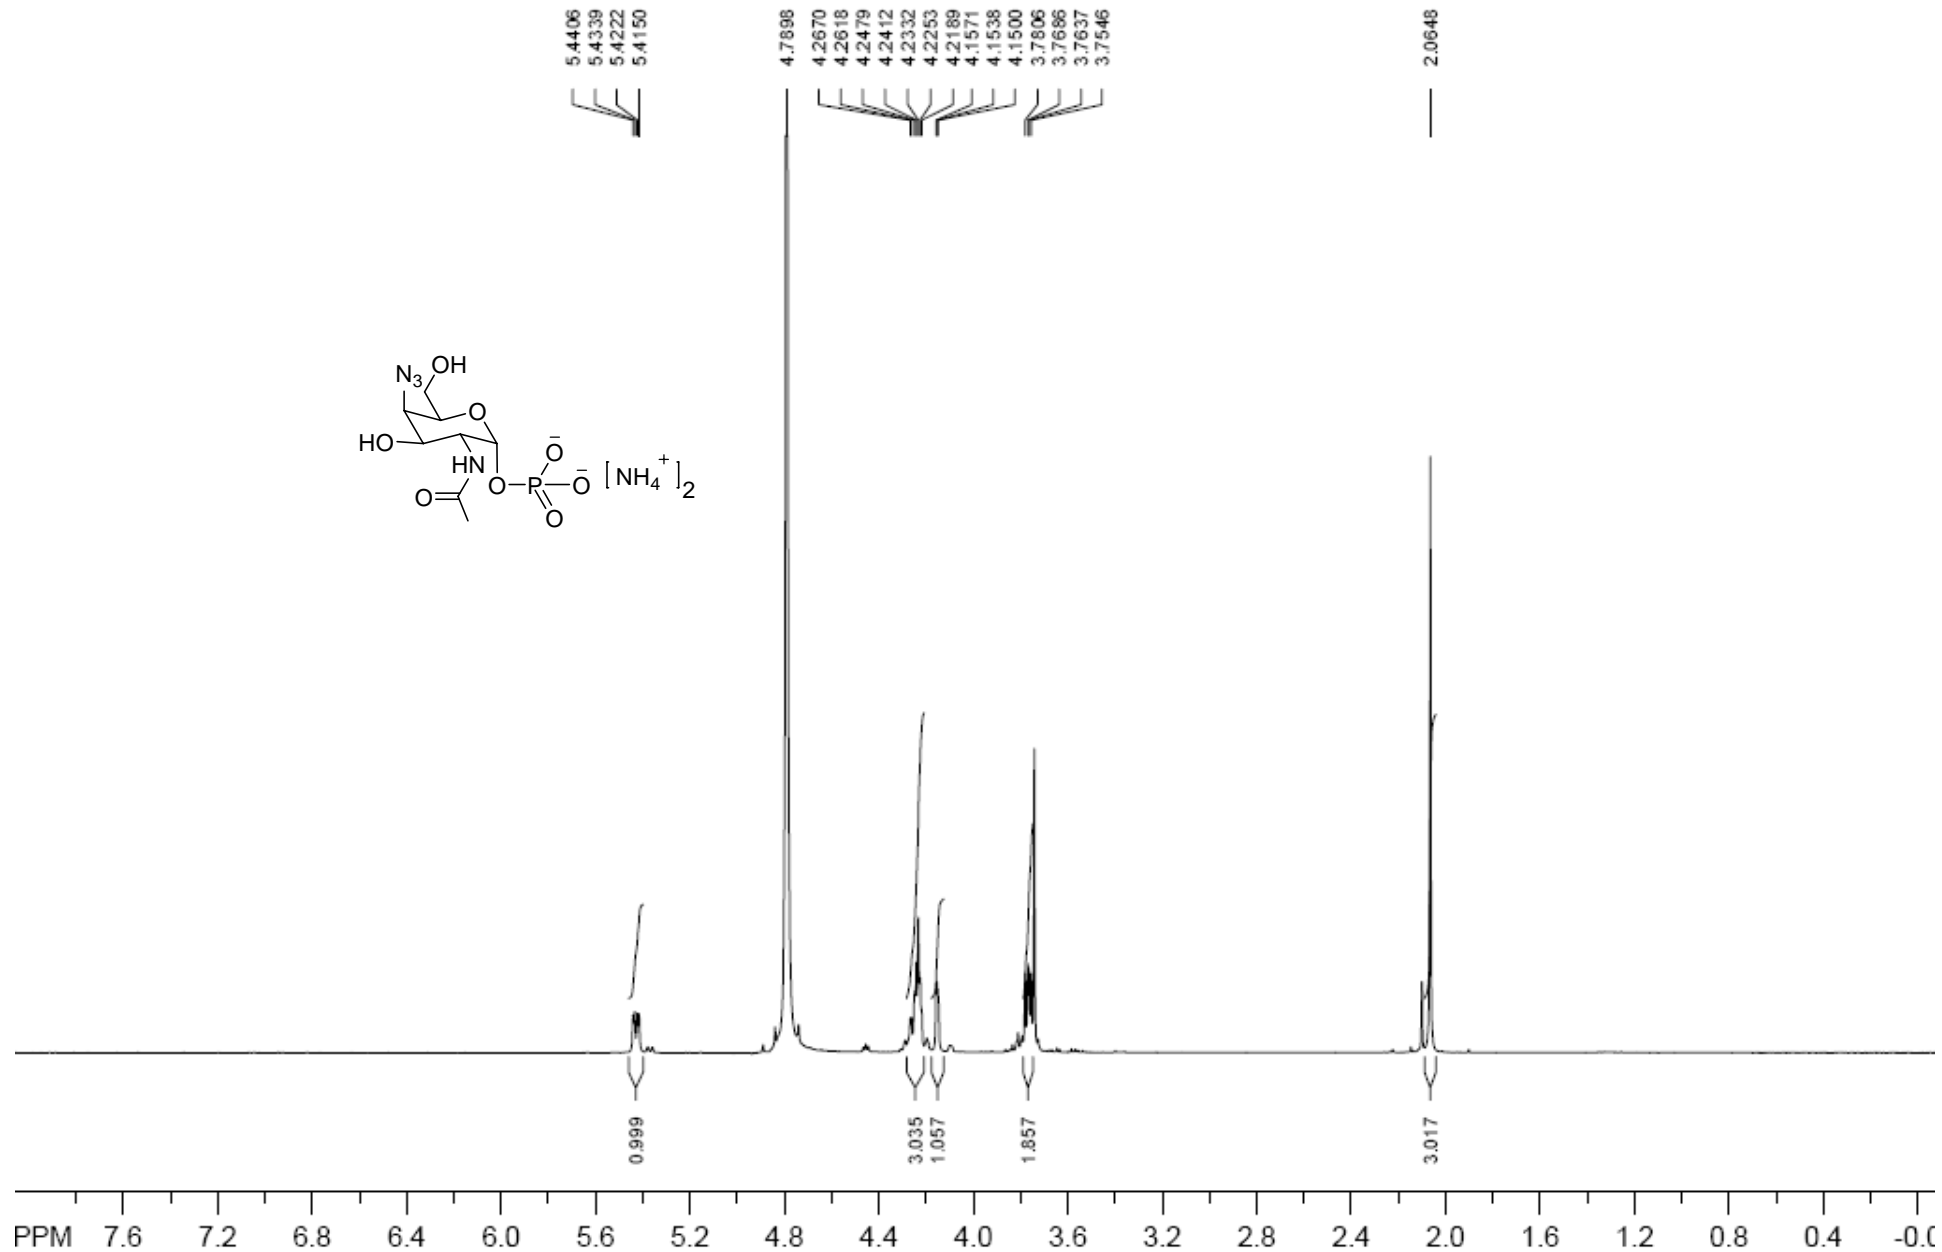

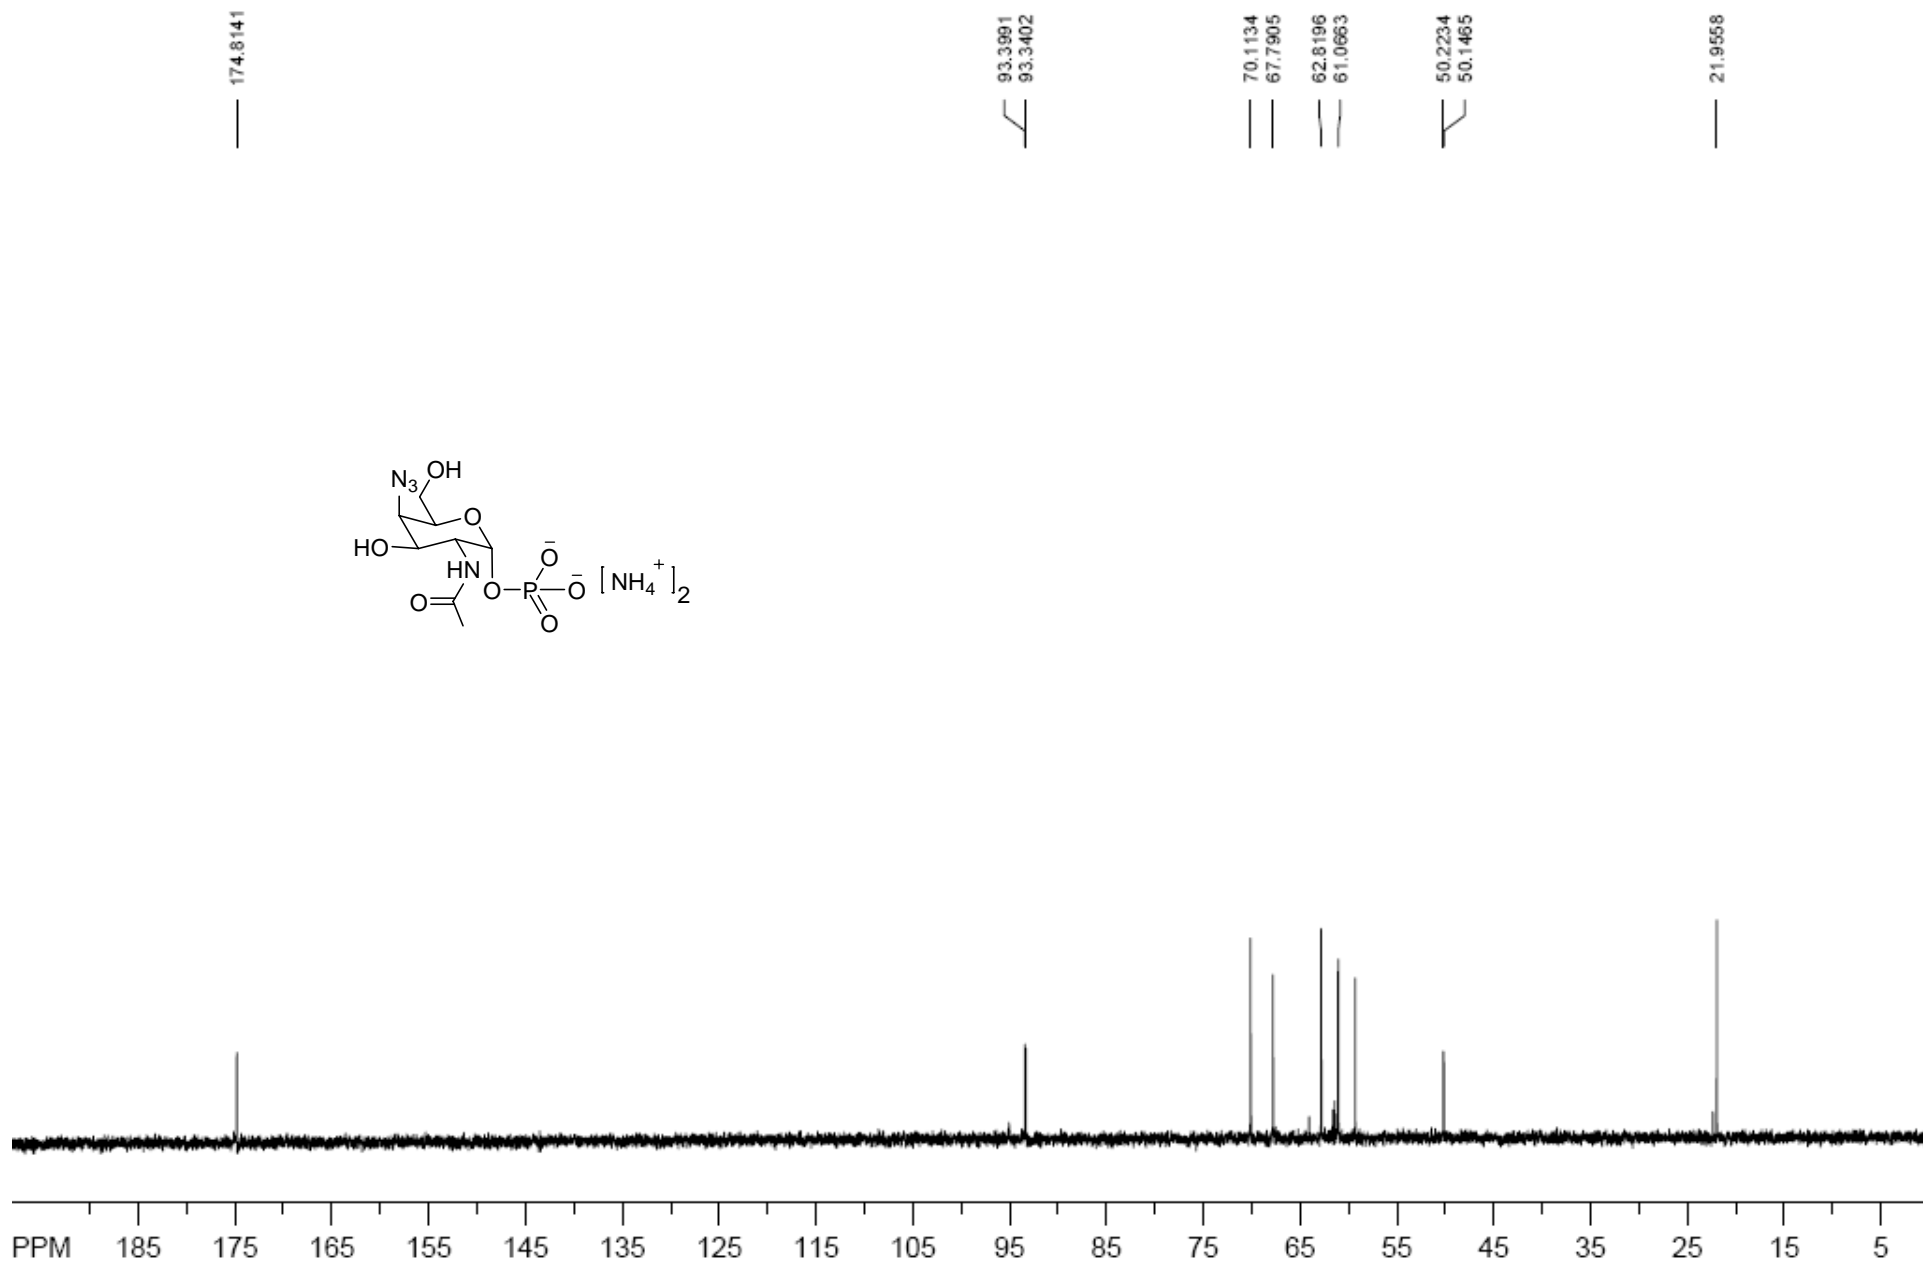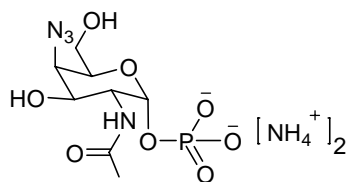



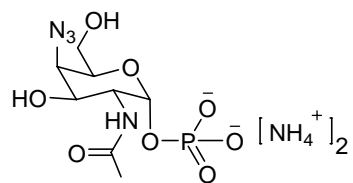

-0.9491

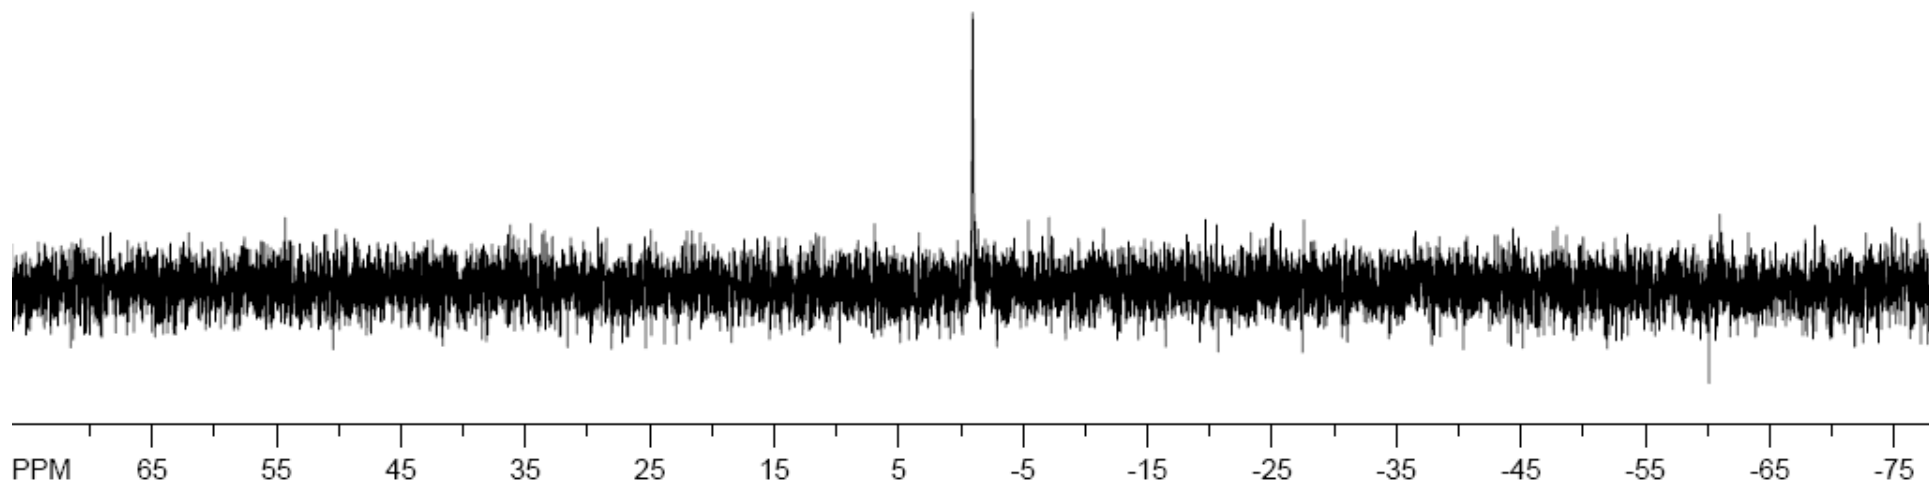

S5

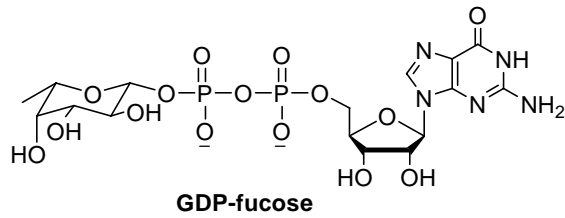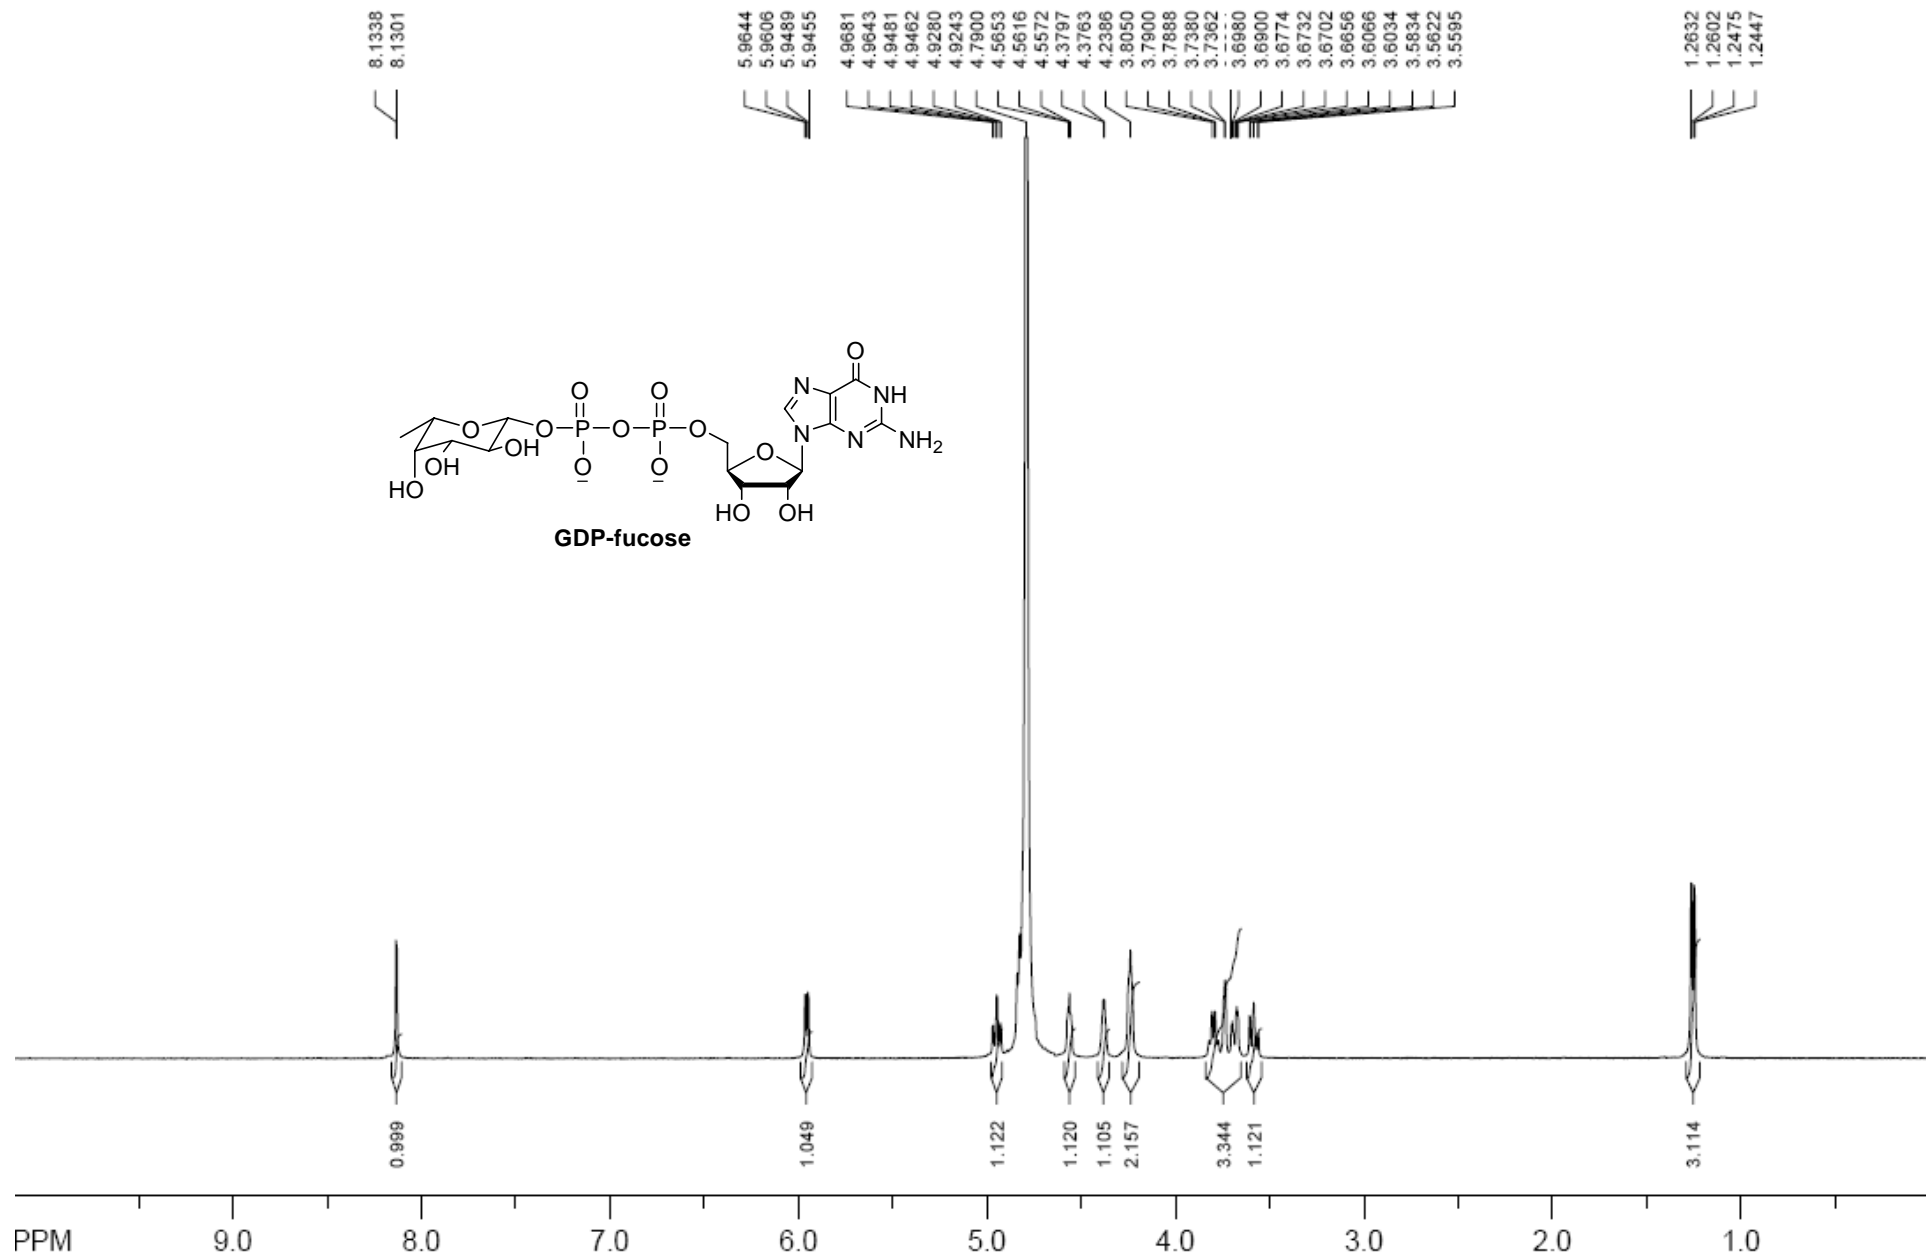

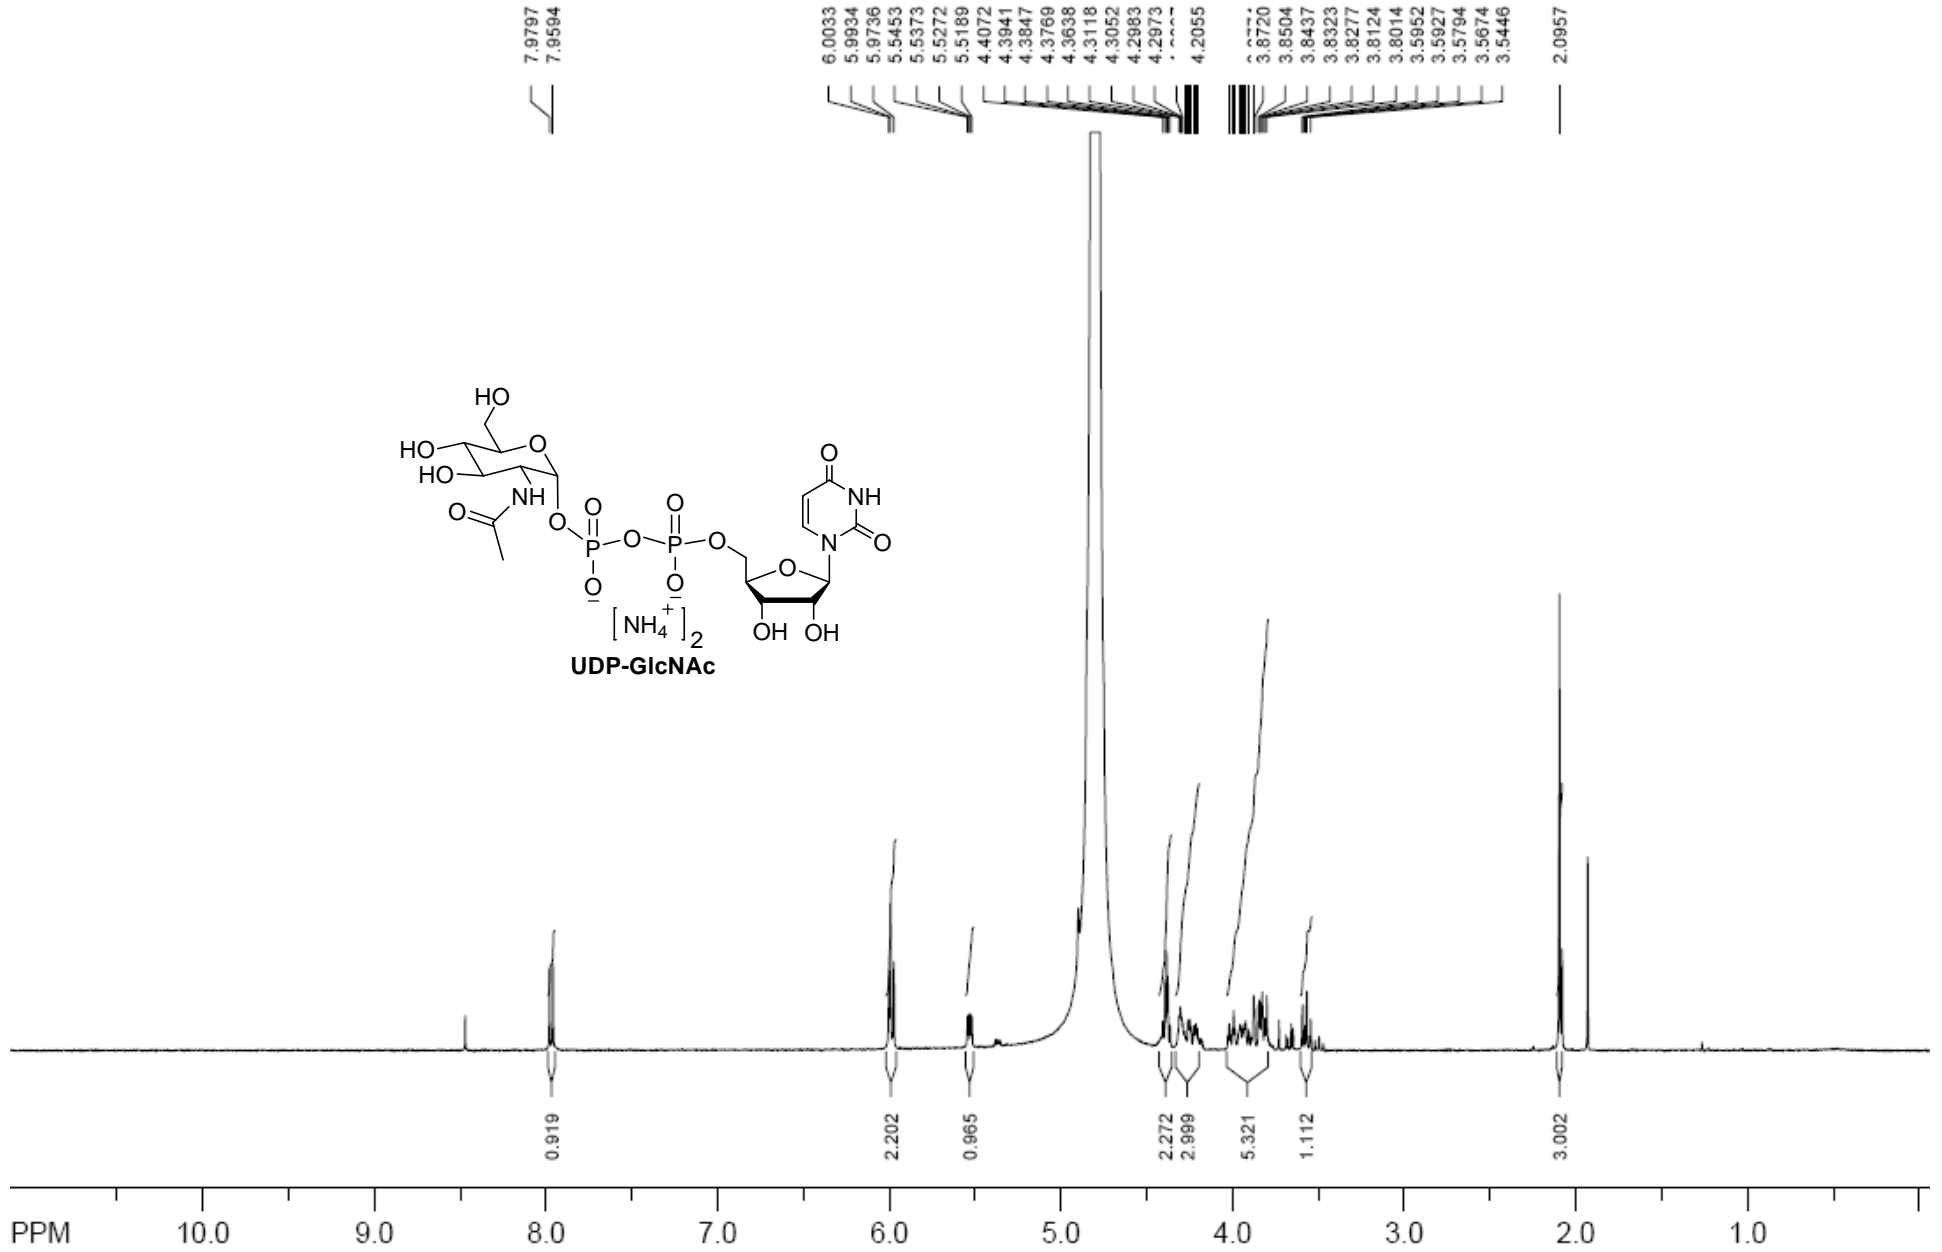

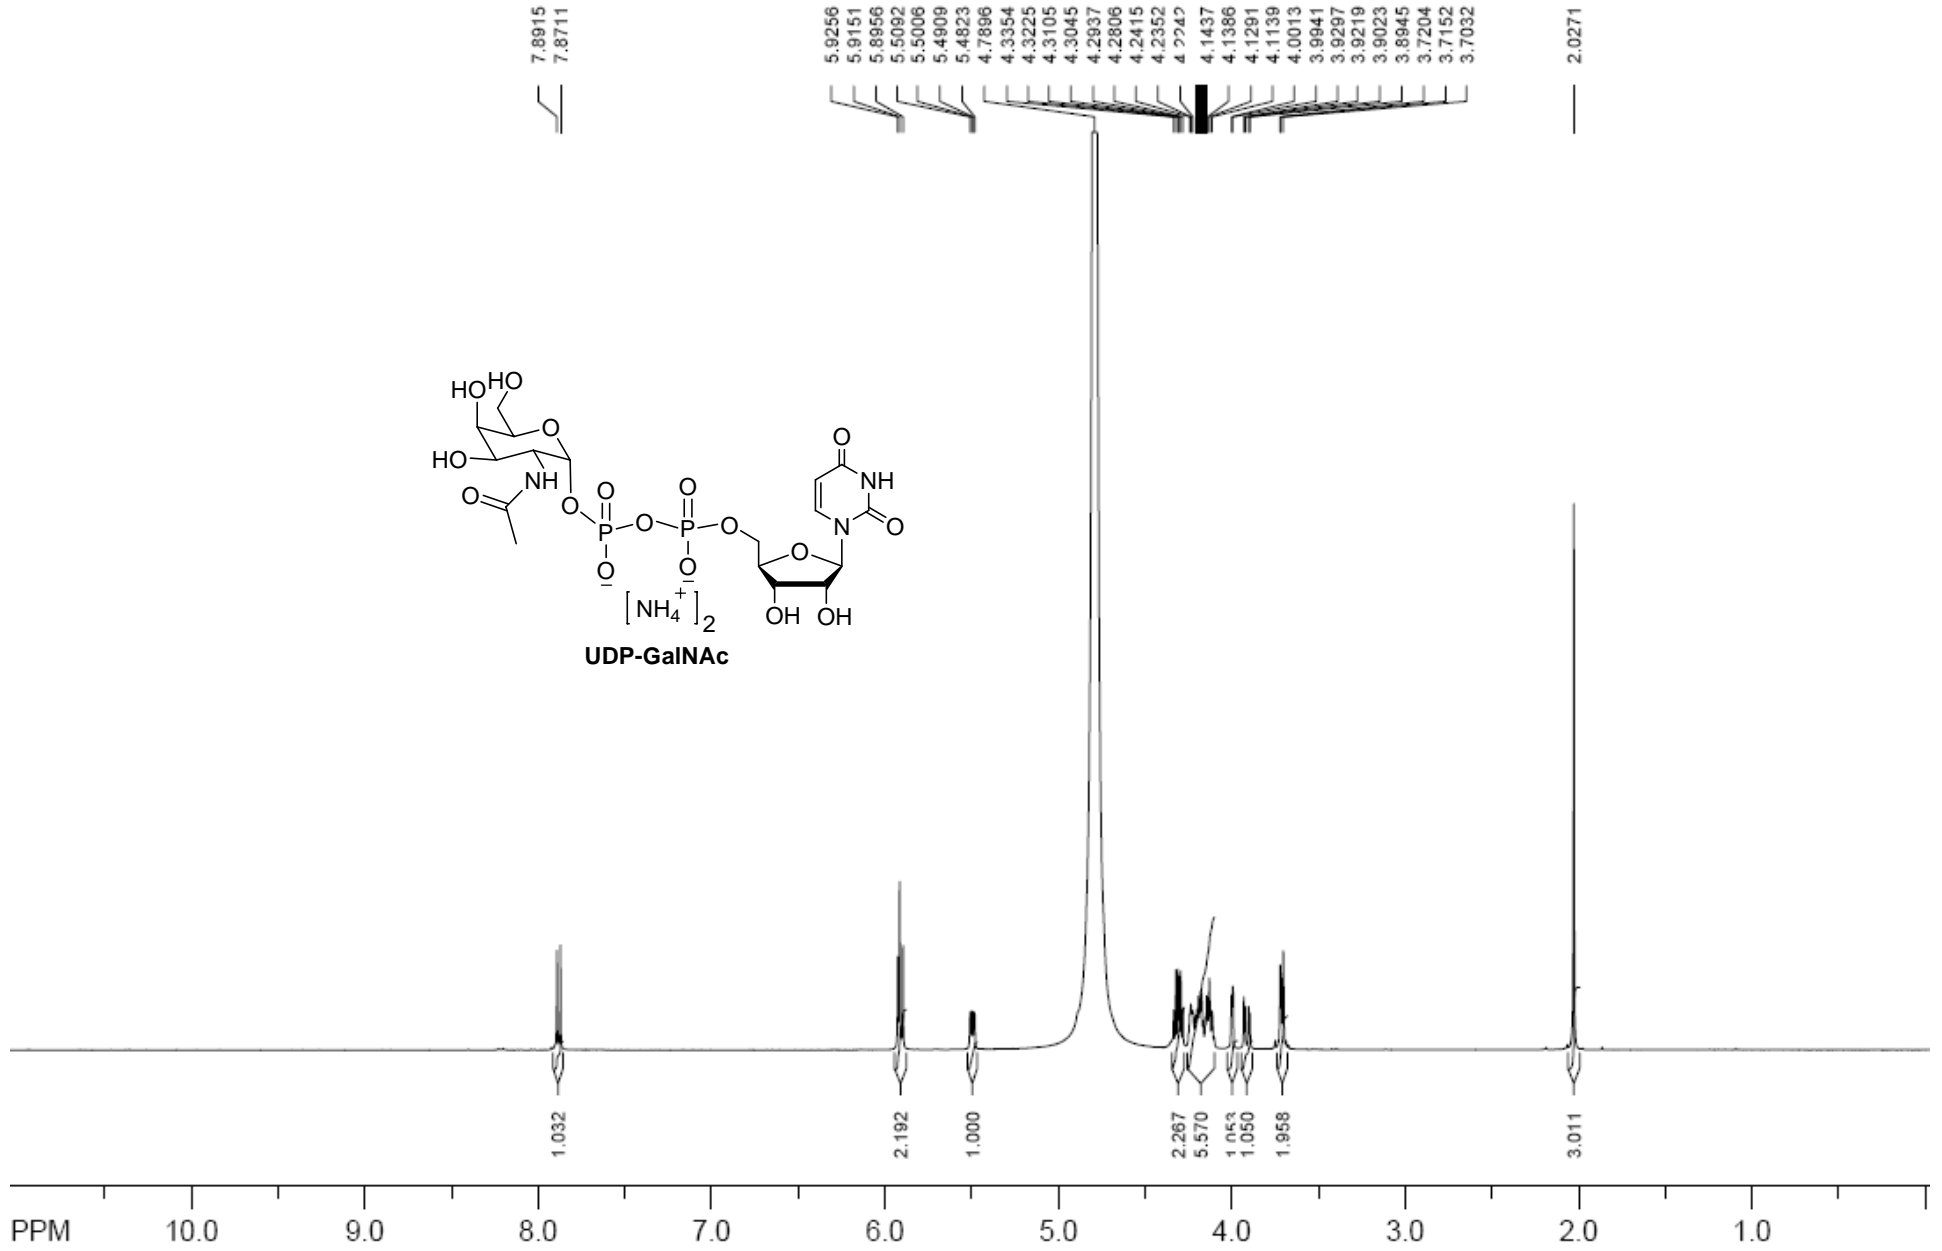

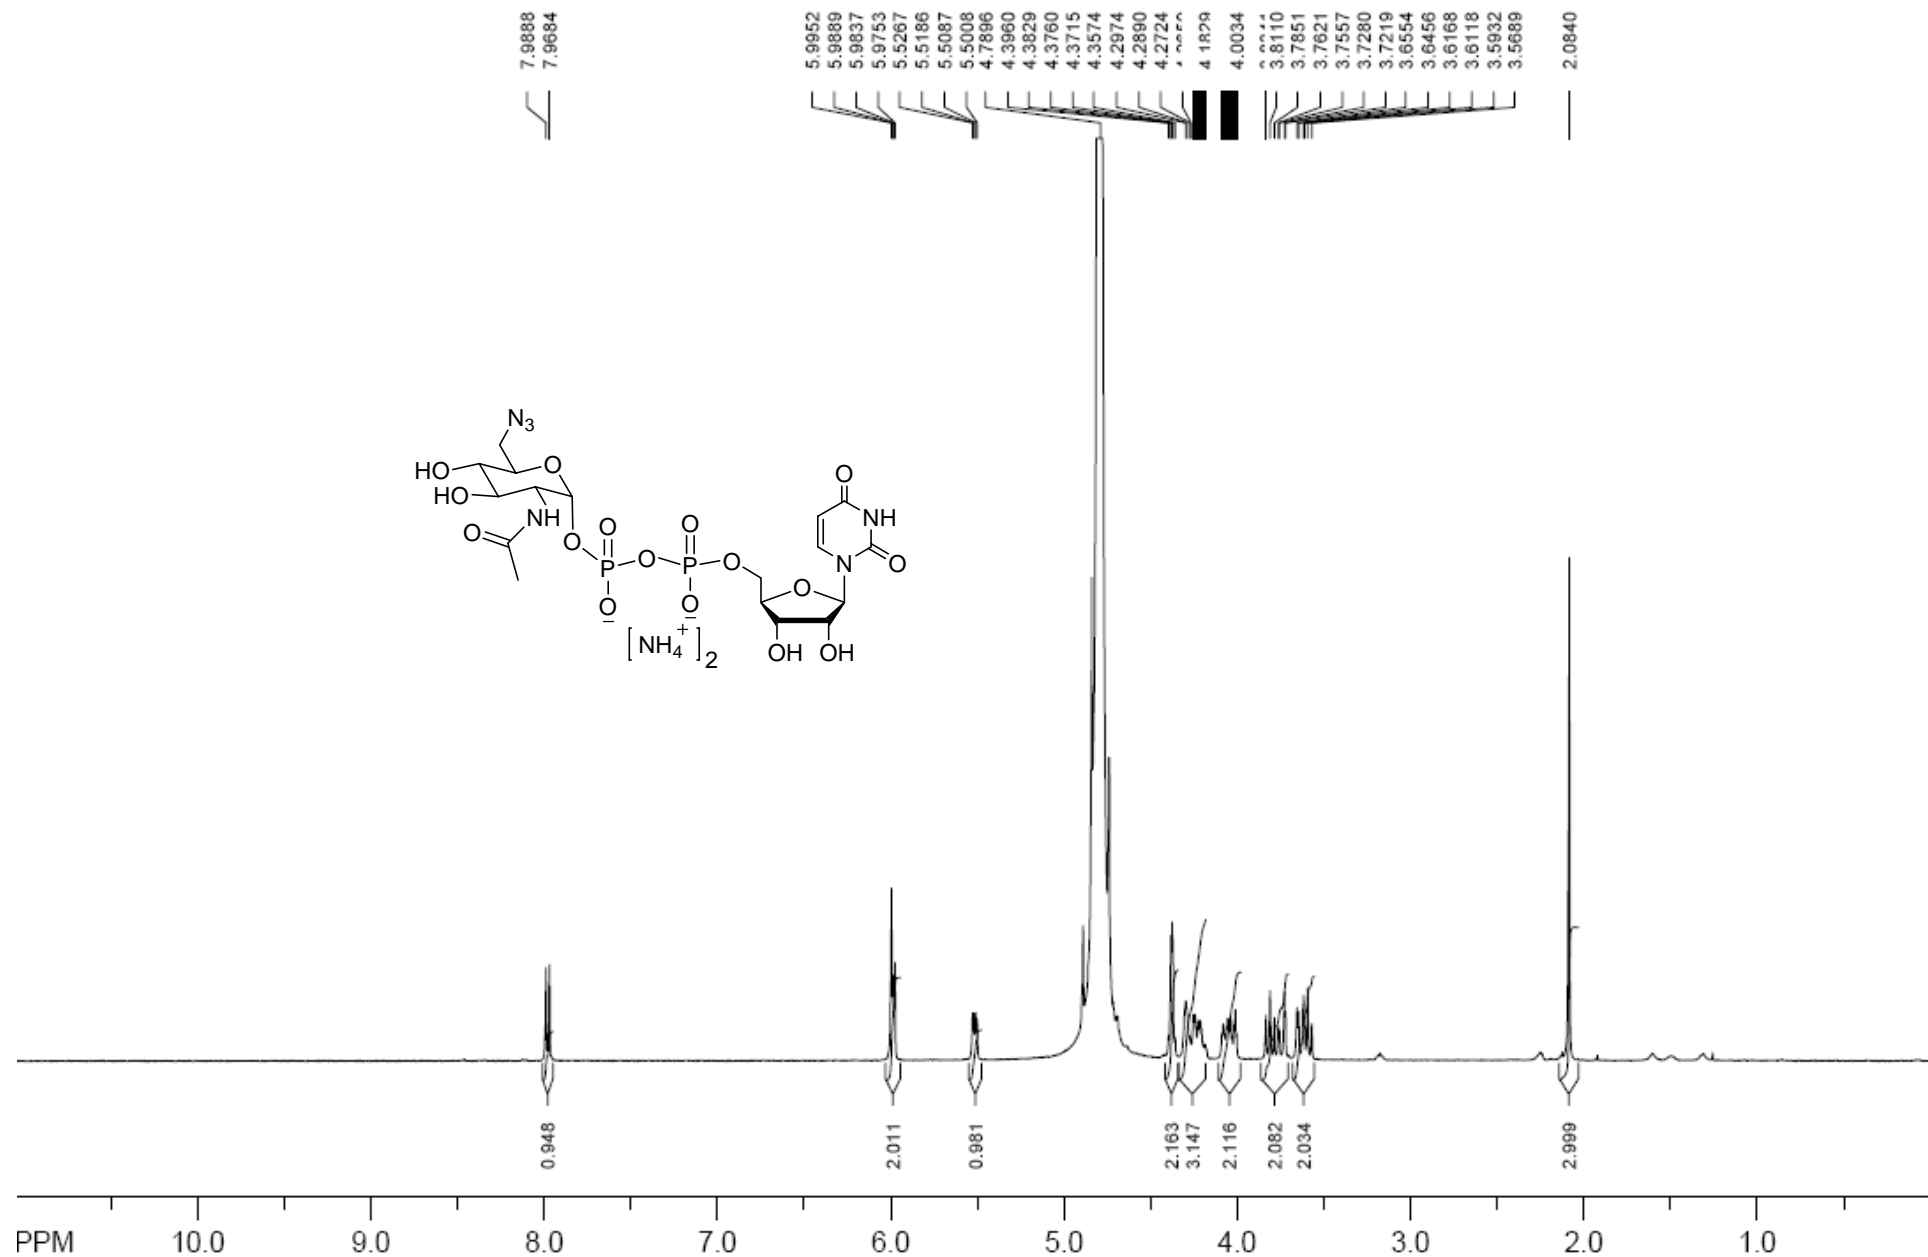

-11.2077  
-11.3393  
-13.1037  
-13.2364

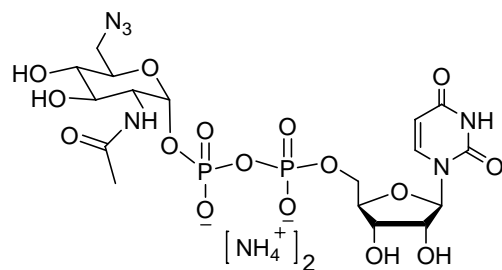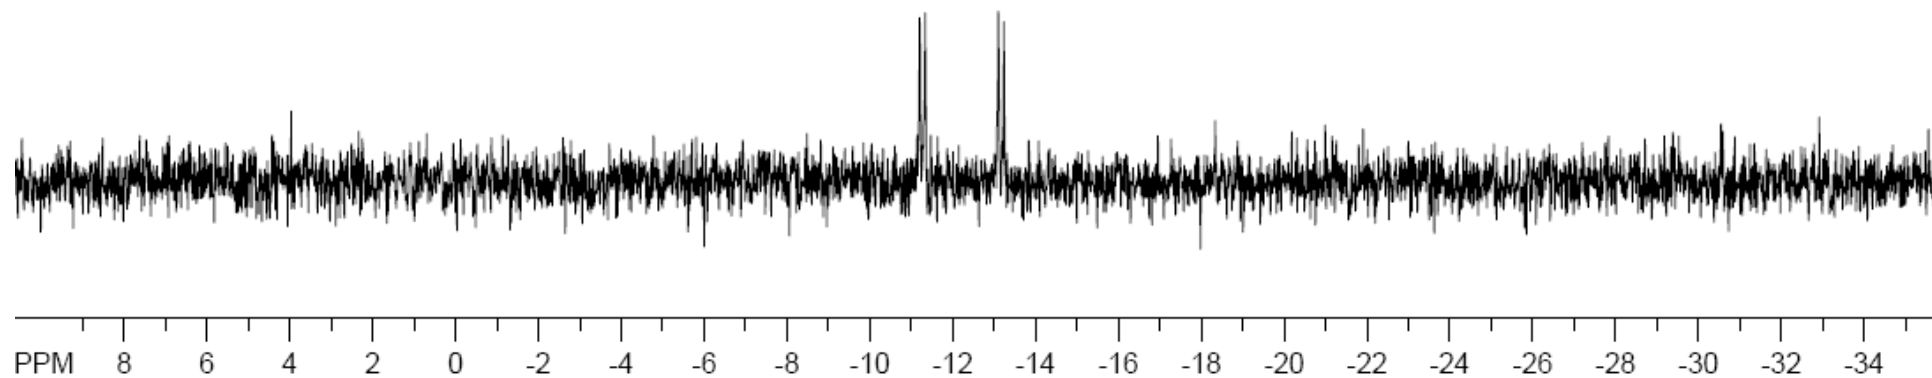

S5

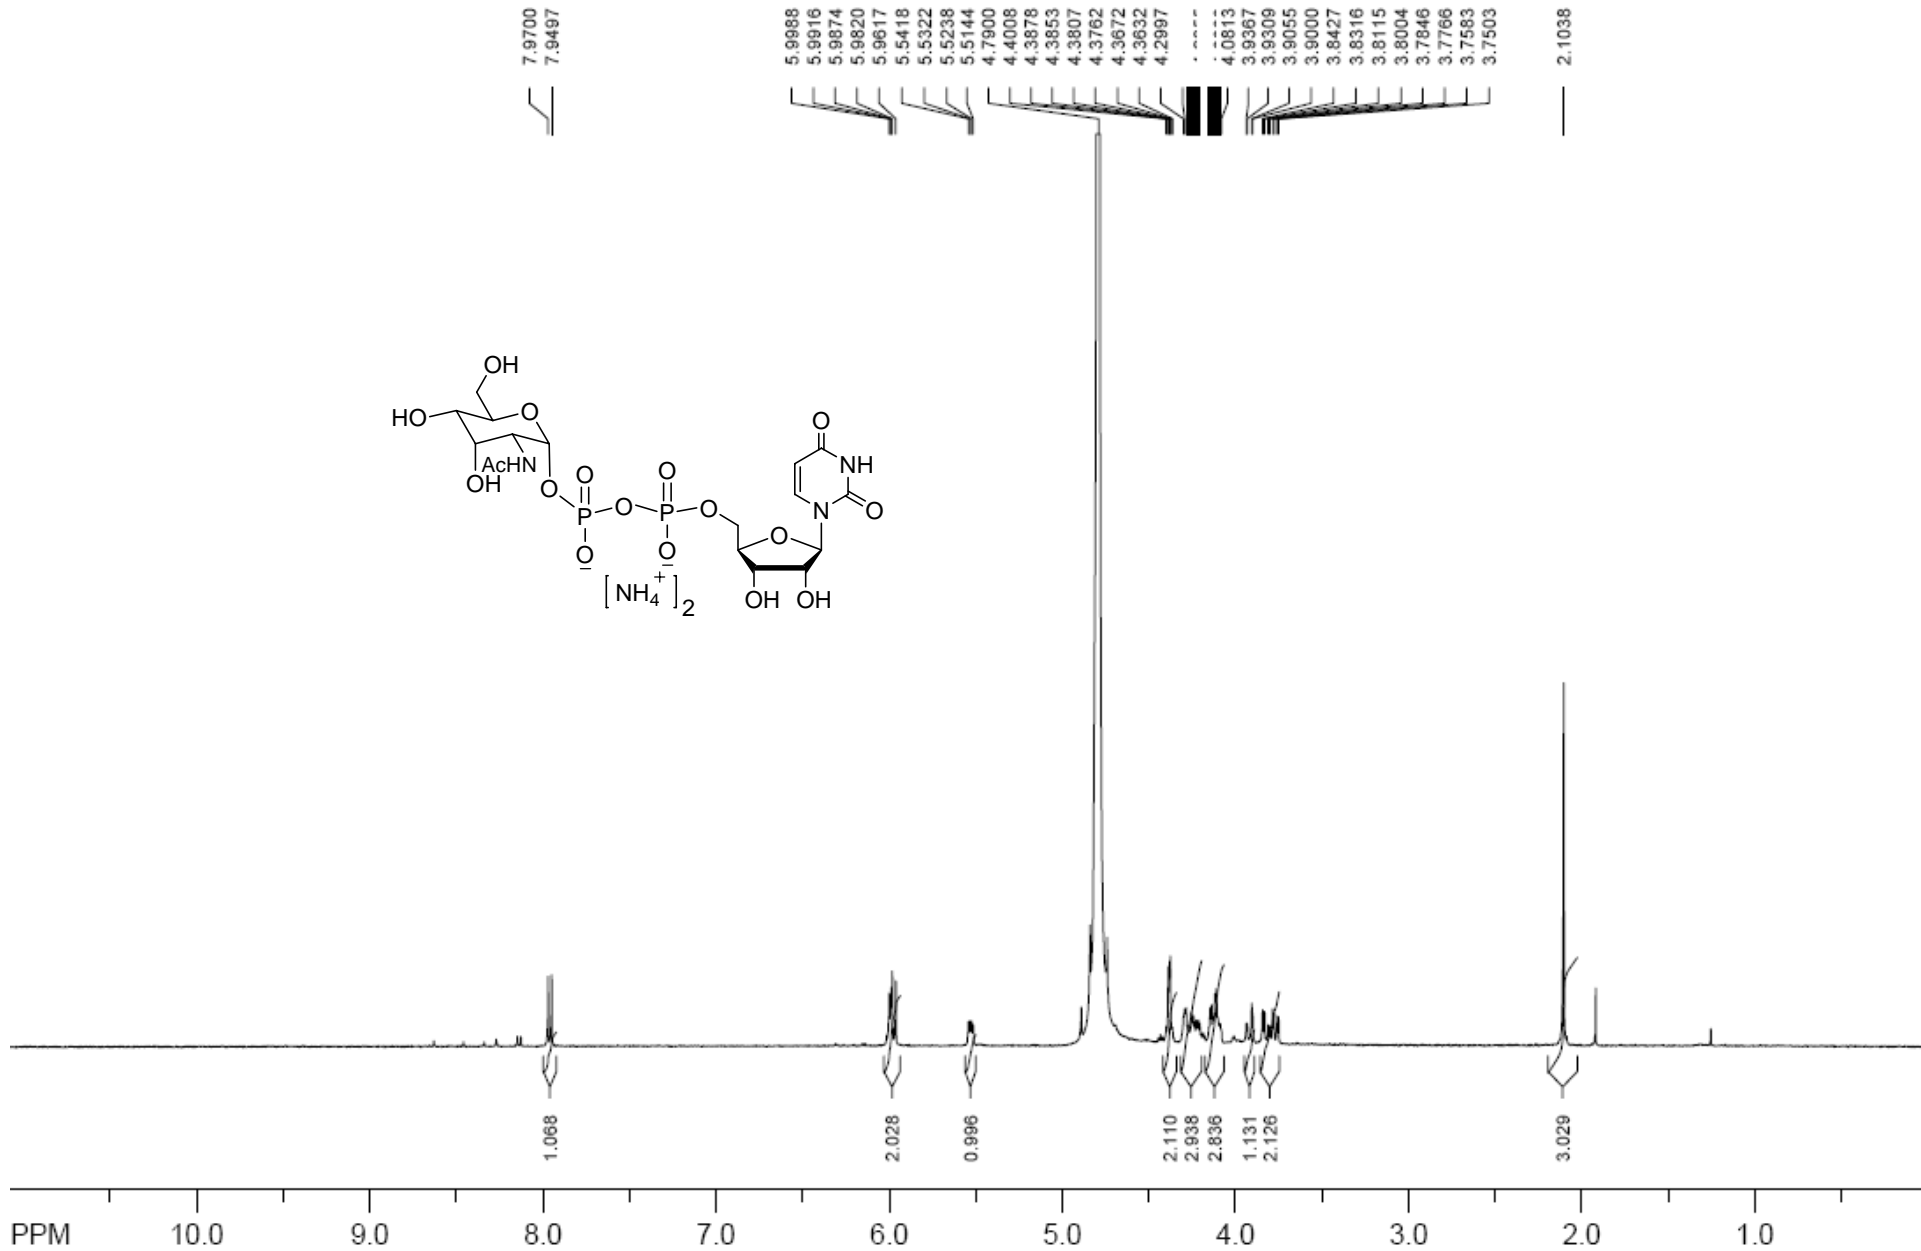

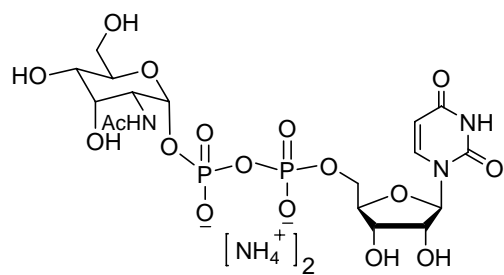

-10.9861  
-11.1089

-12.9464  
-13.0802

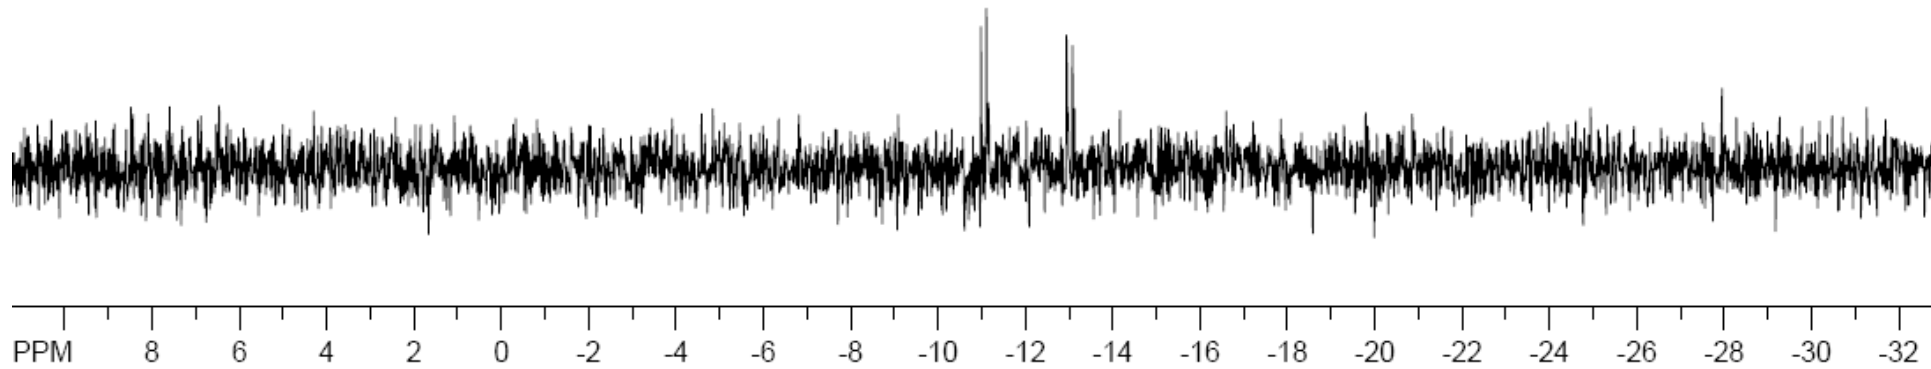

S5



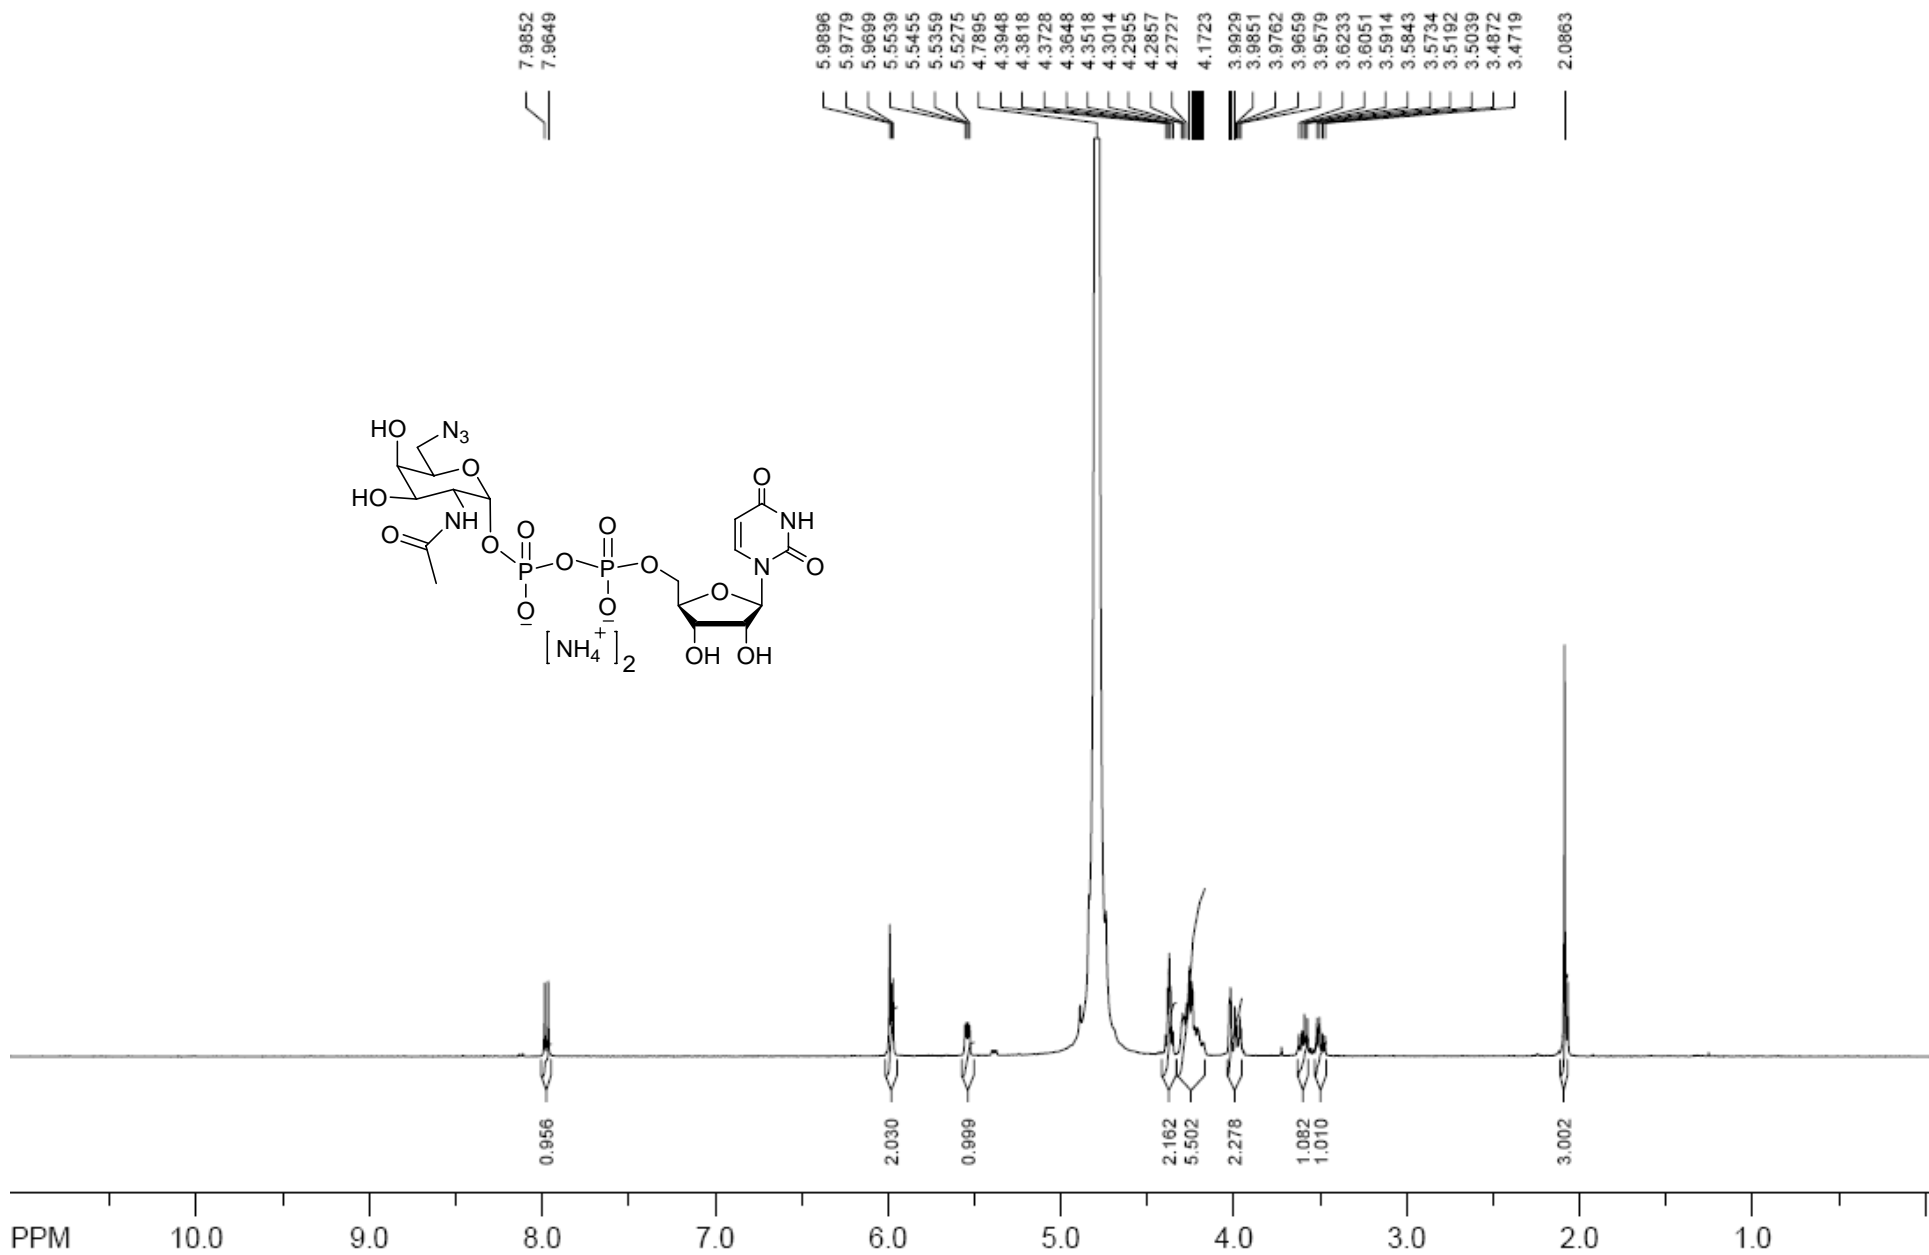

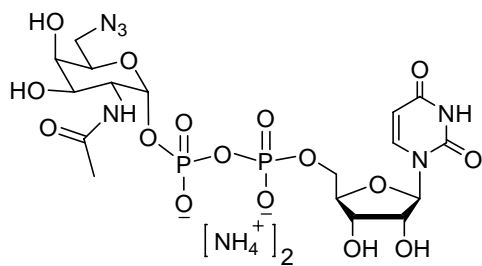

-11.1203  
-11.2519

-12.9302  
-13.0615

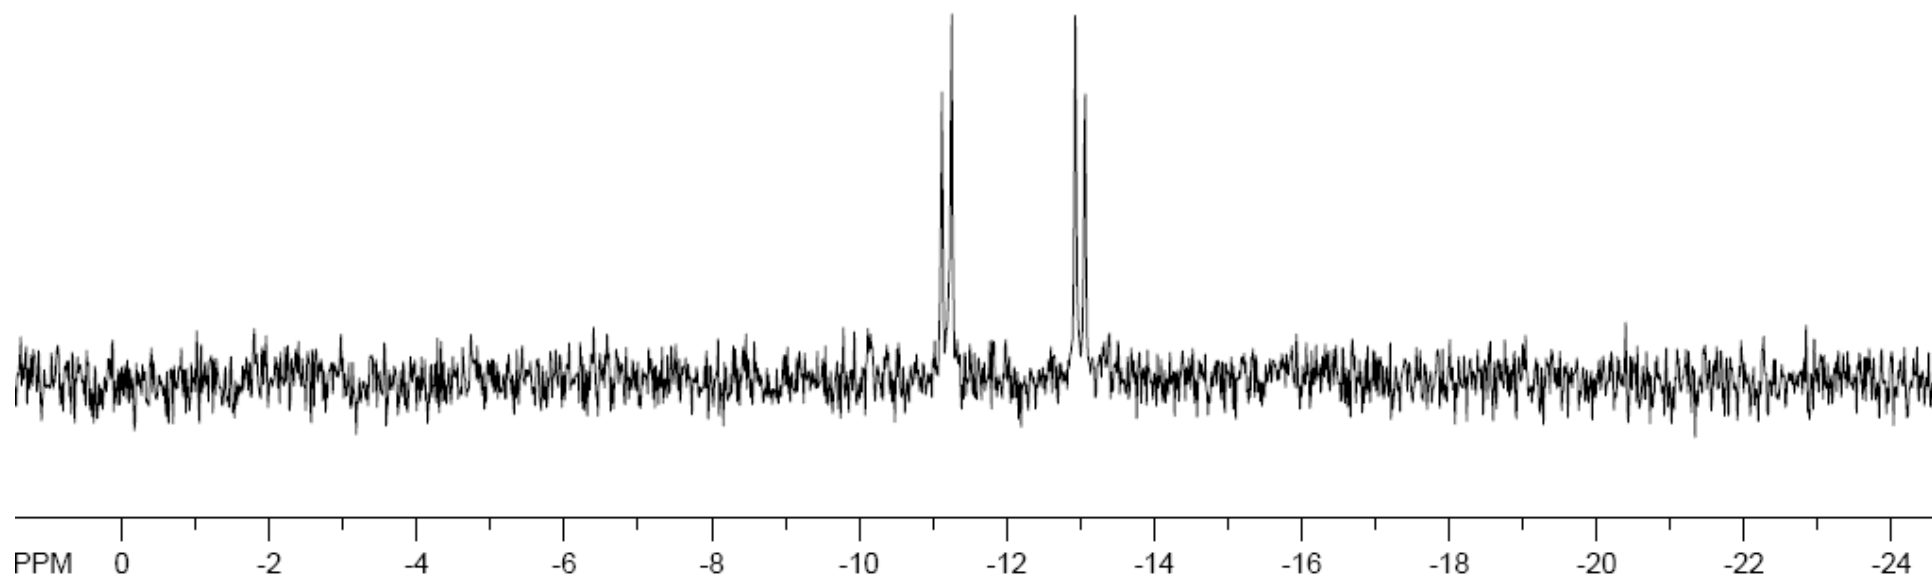

S5

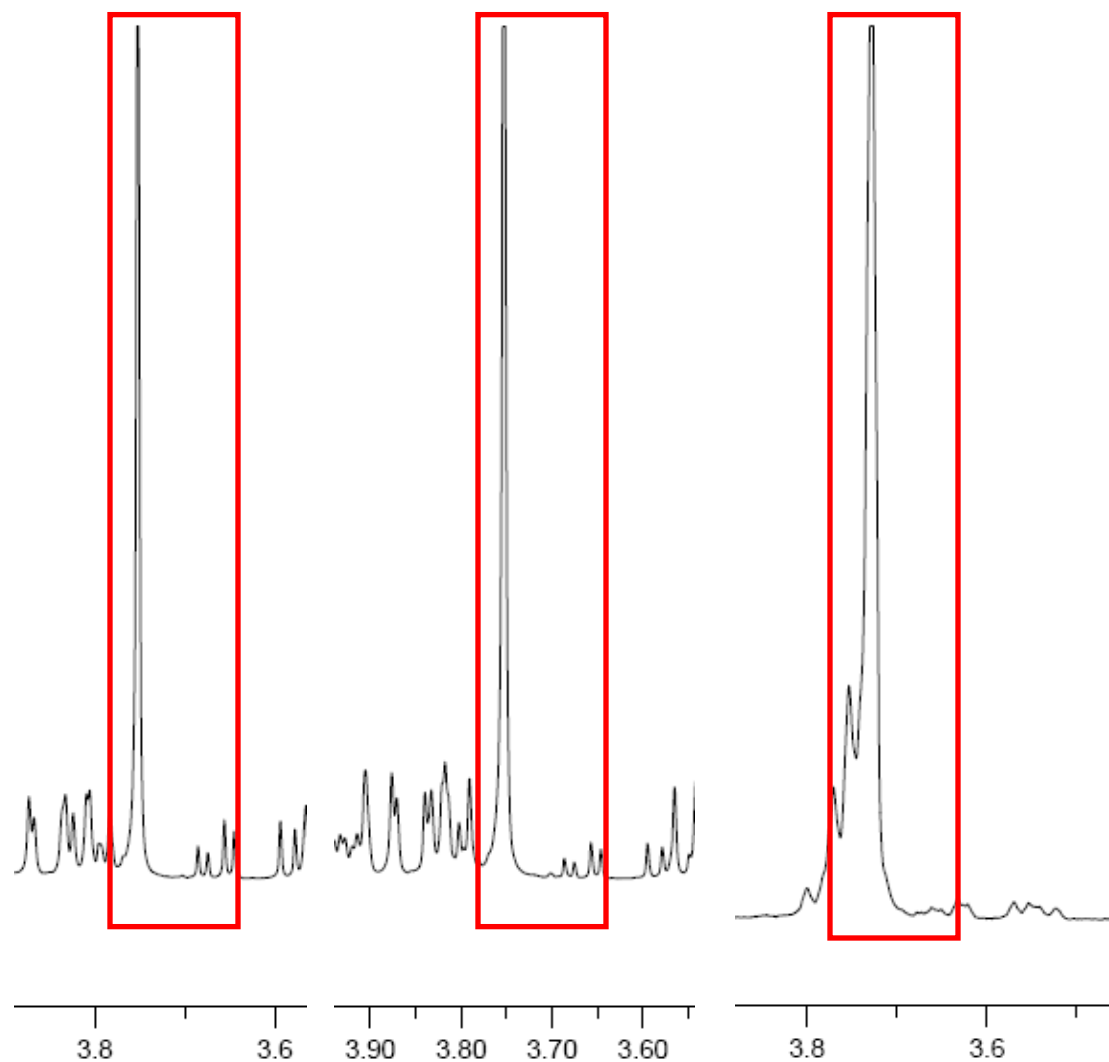

Note: NMR regions (red box) showing typical common impurities after the first time silica gel purification of sugar-1-P, second silica gel chromatography is needed to remove the impurities for NMR purposes.

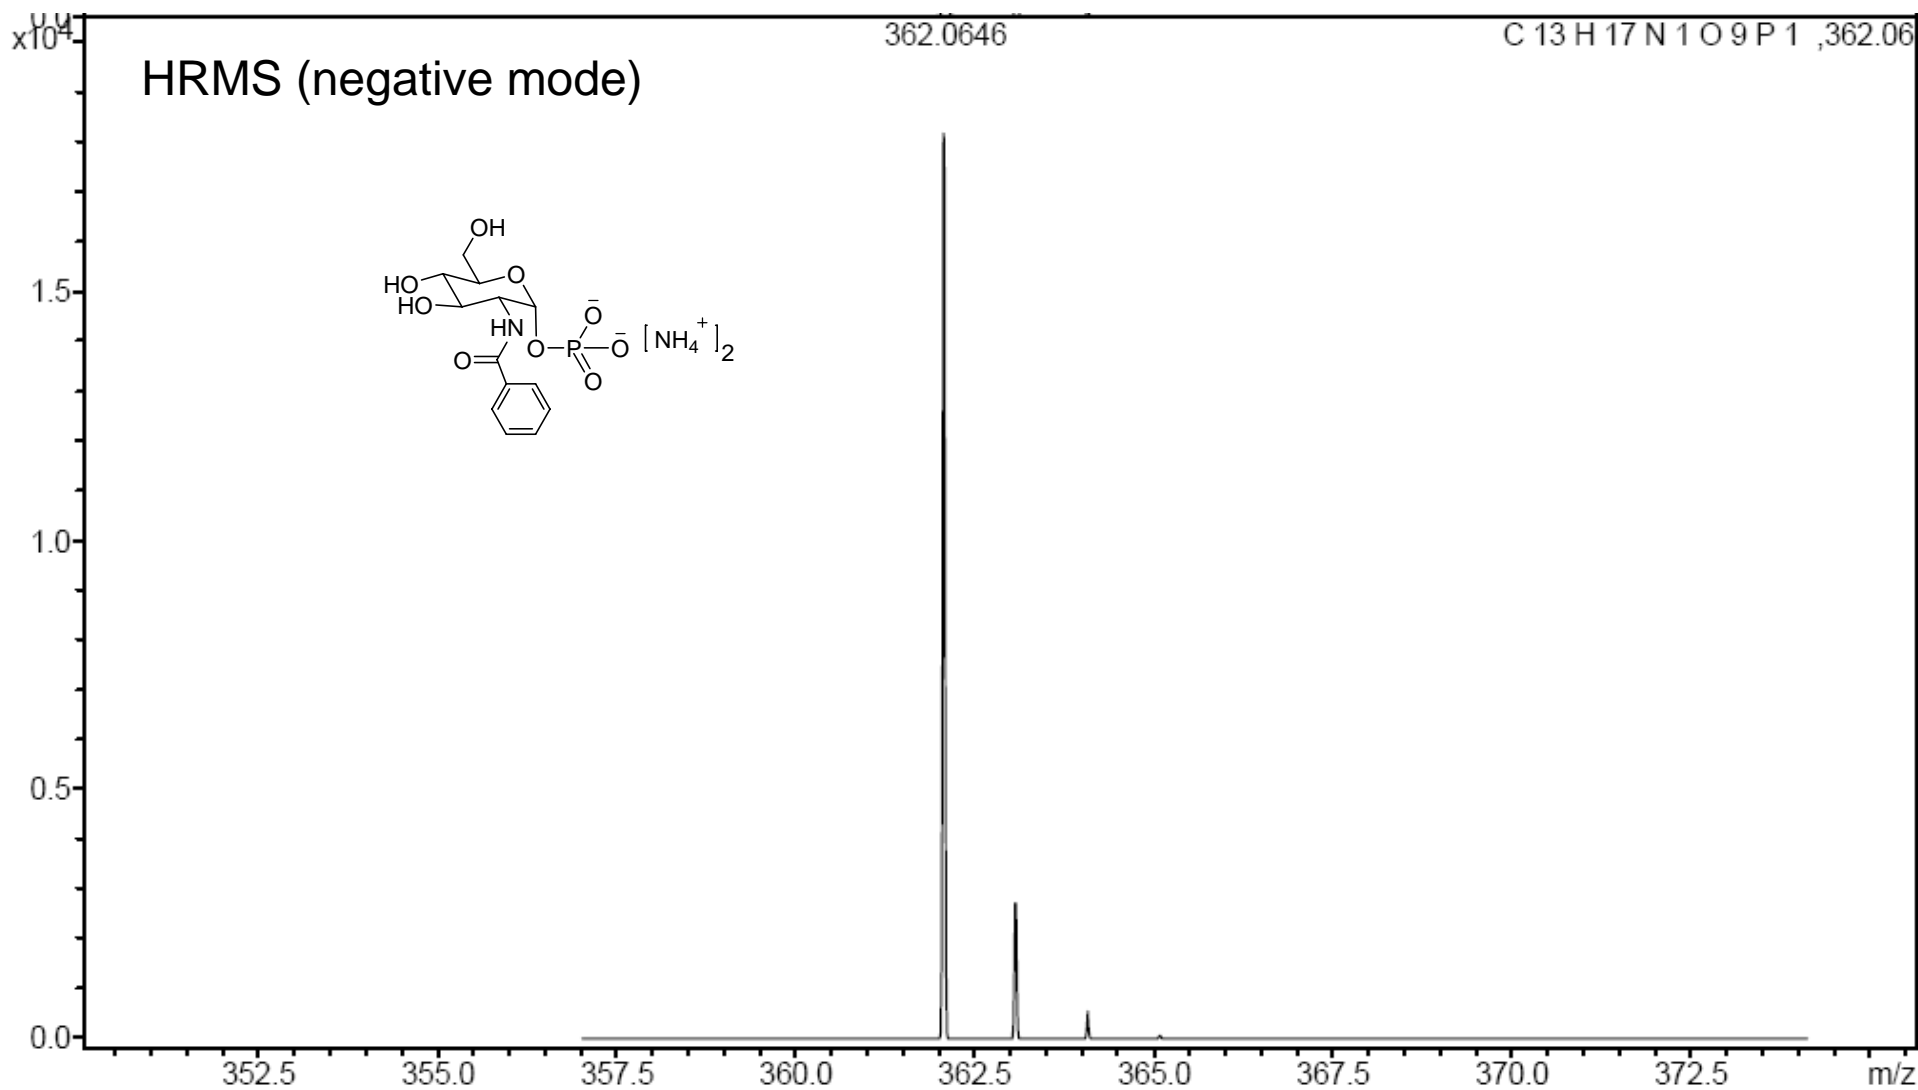

C<sub>8</sub>H<sub>14</sub>N<sub>4</sub>O<sub>8</sub>P<sub>1</sub>, 325.05

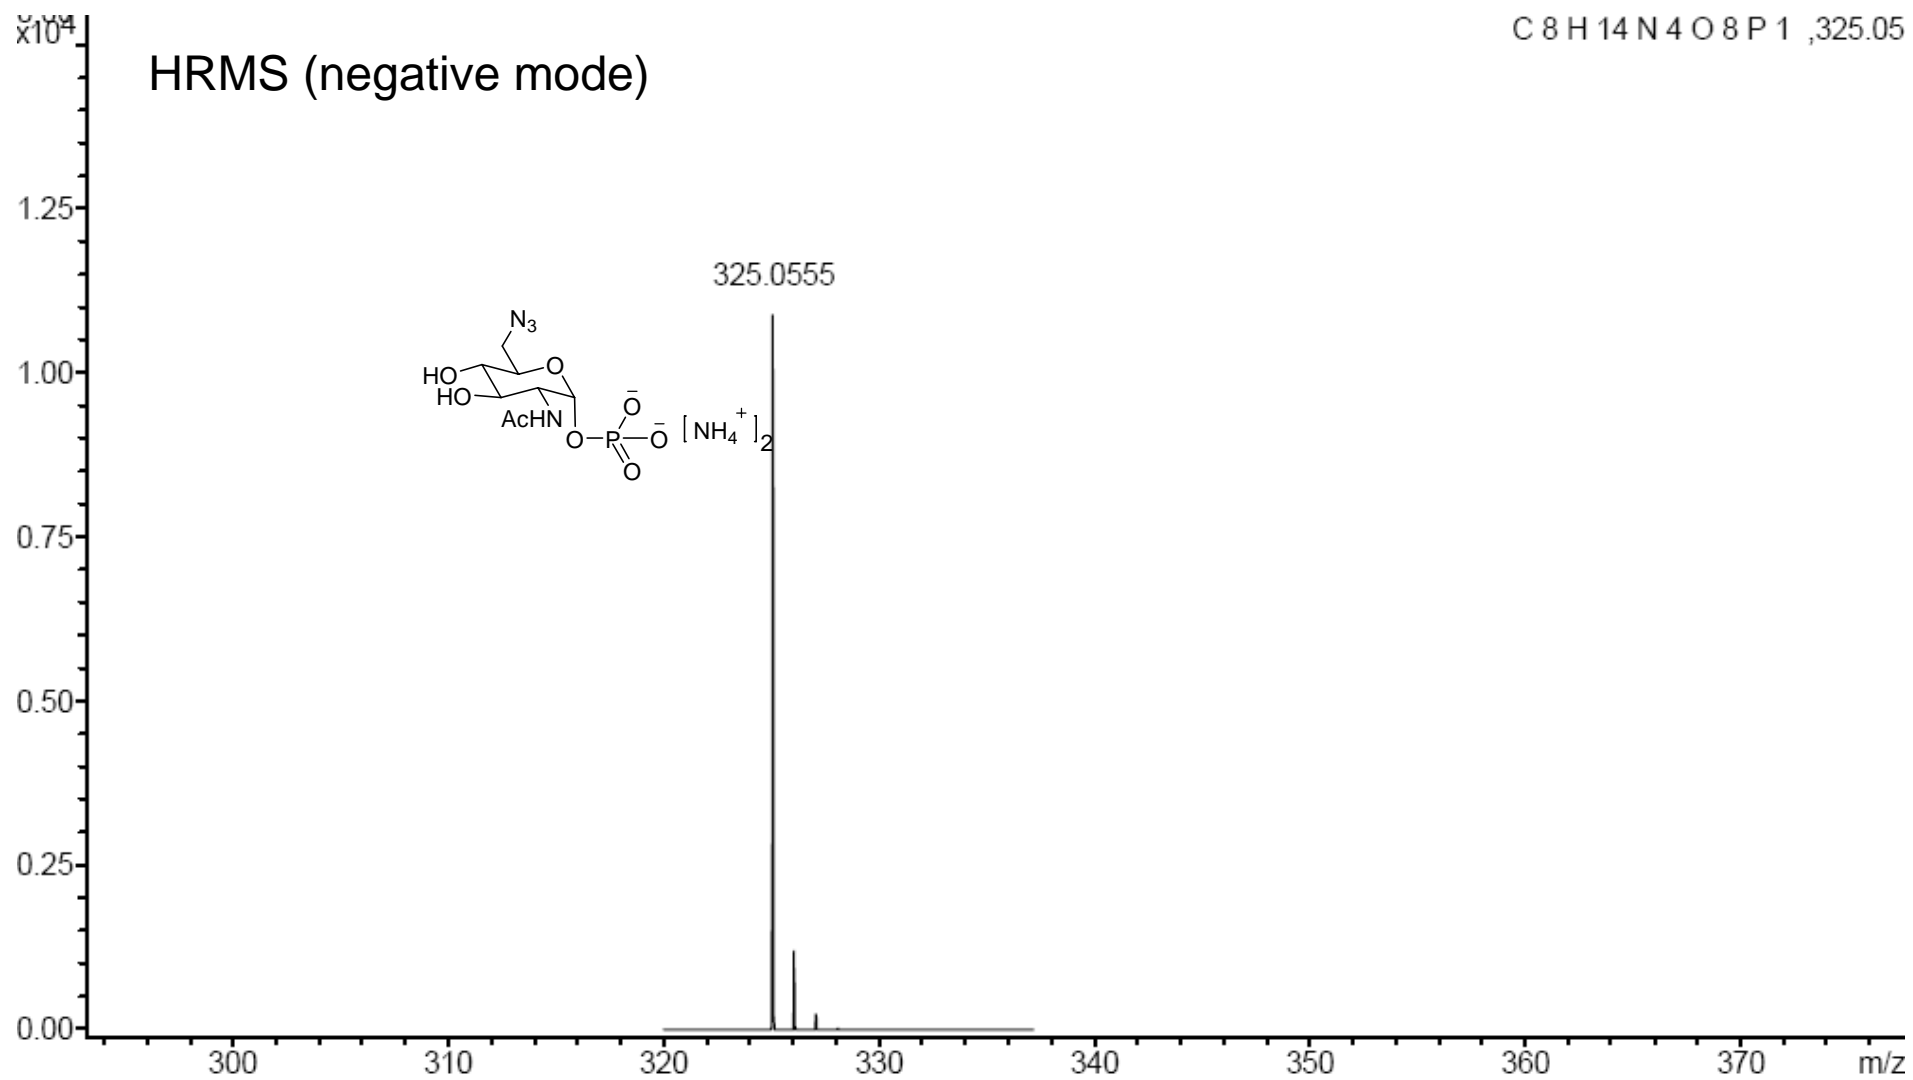

# HRMS (negative mode)

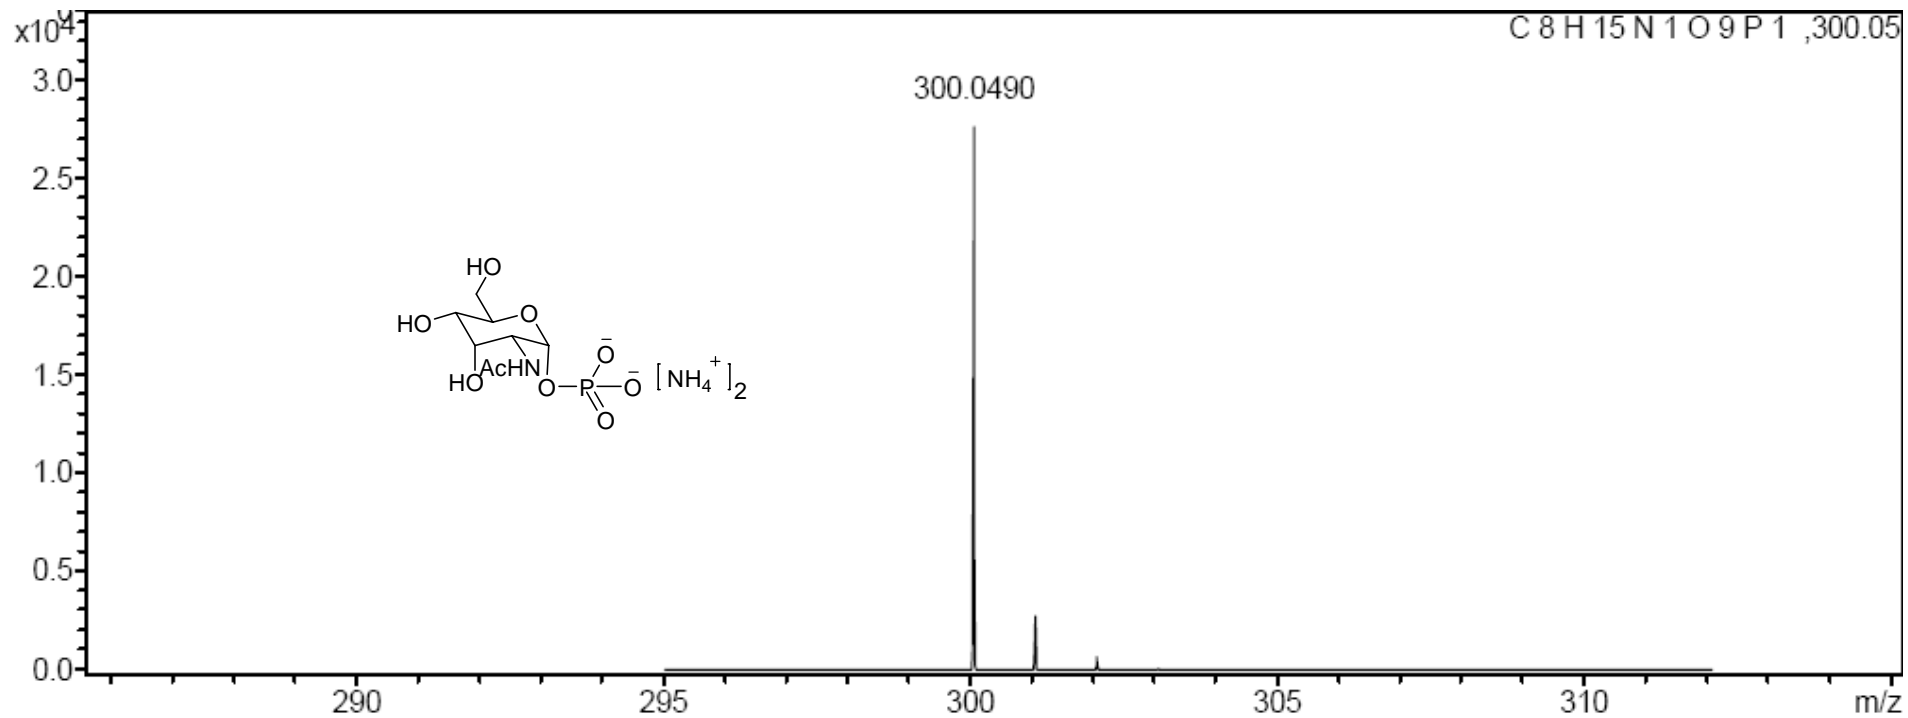

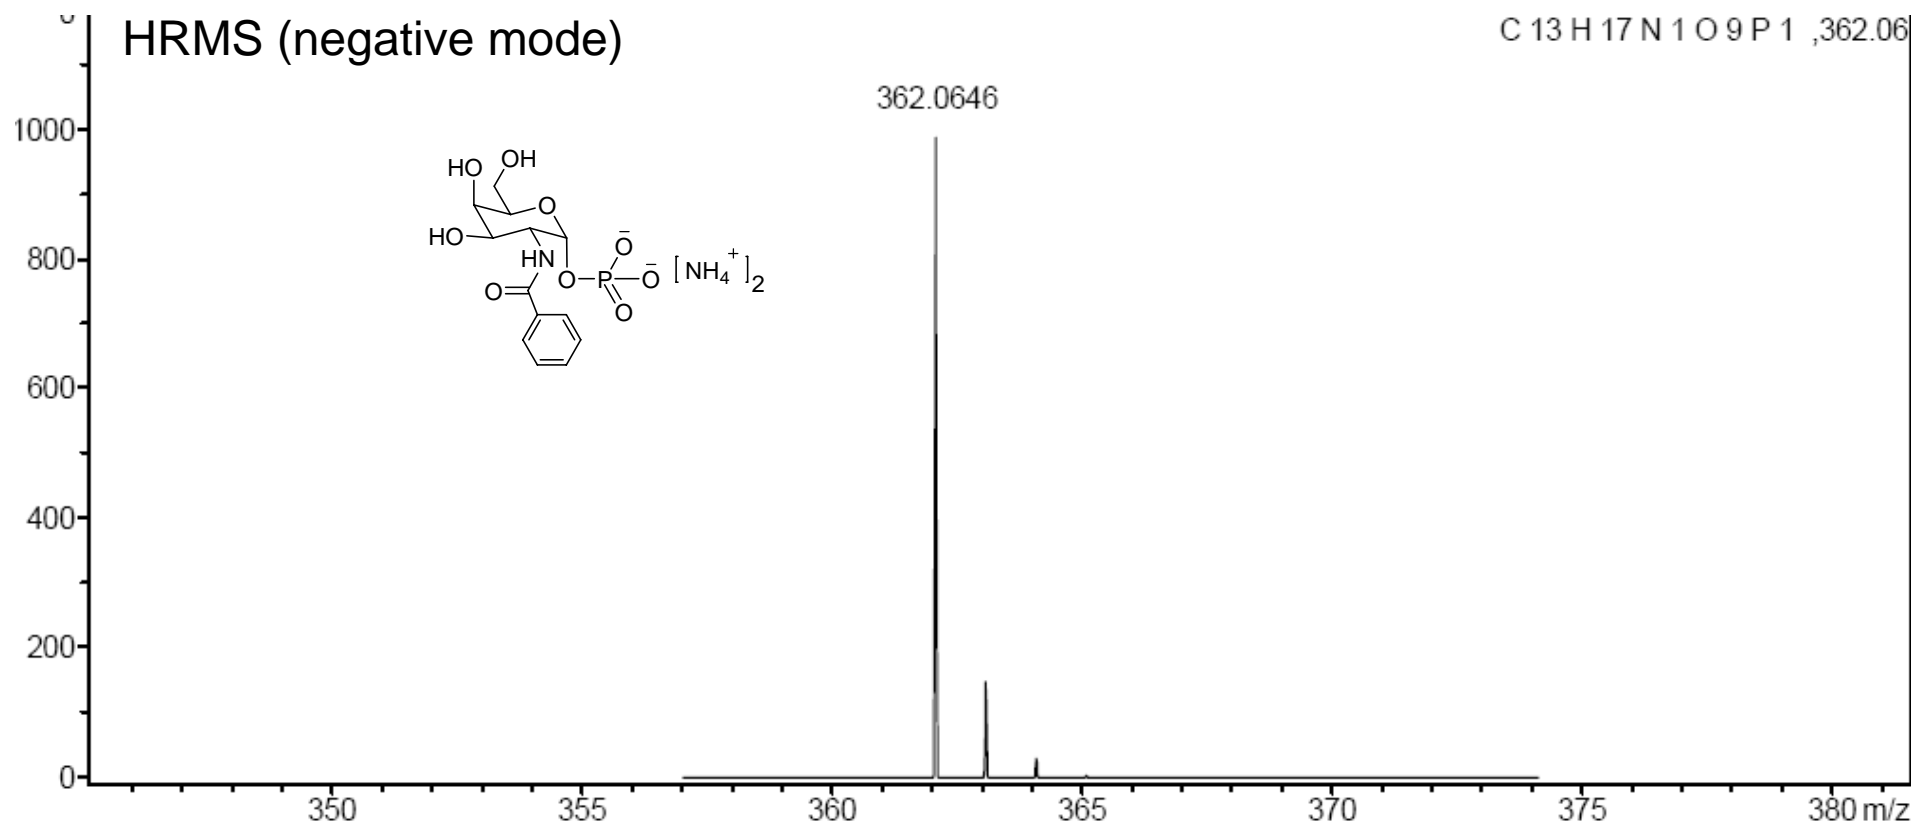

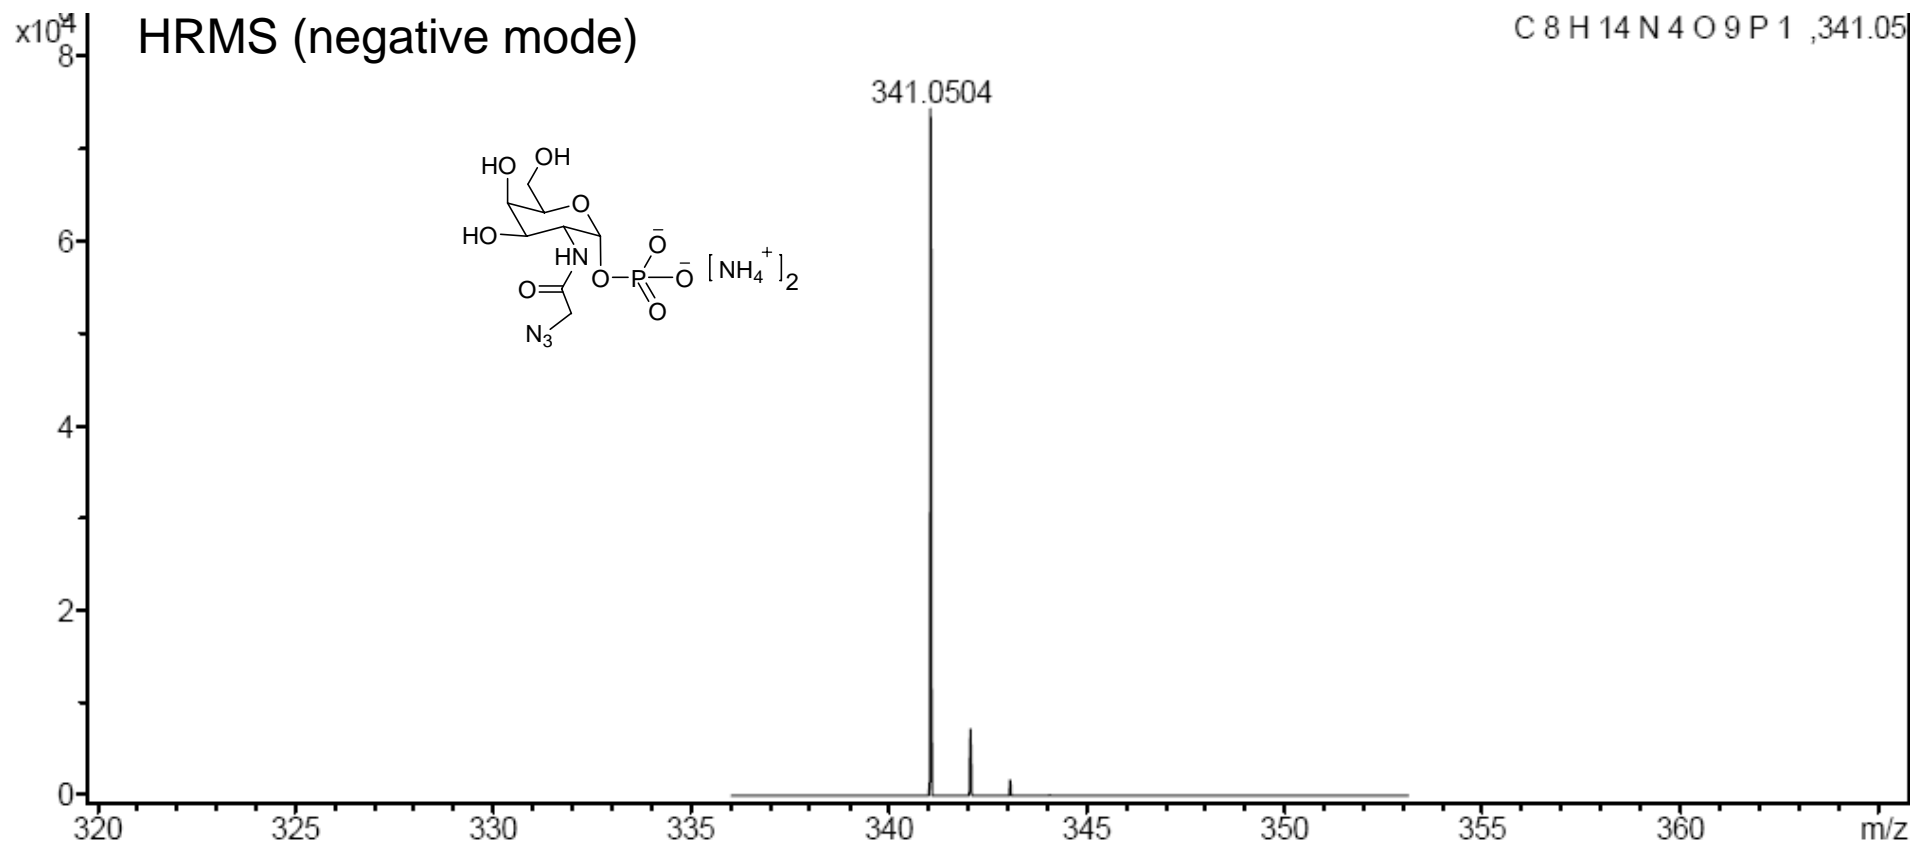



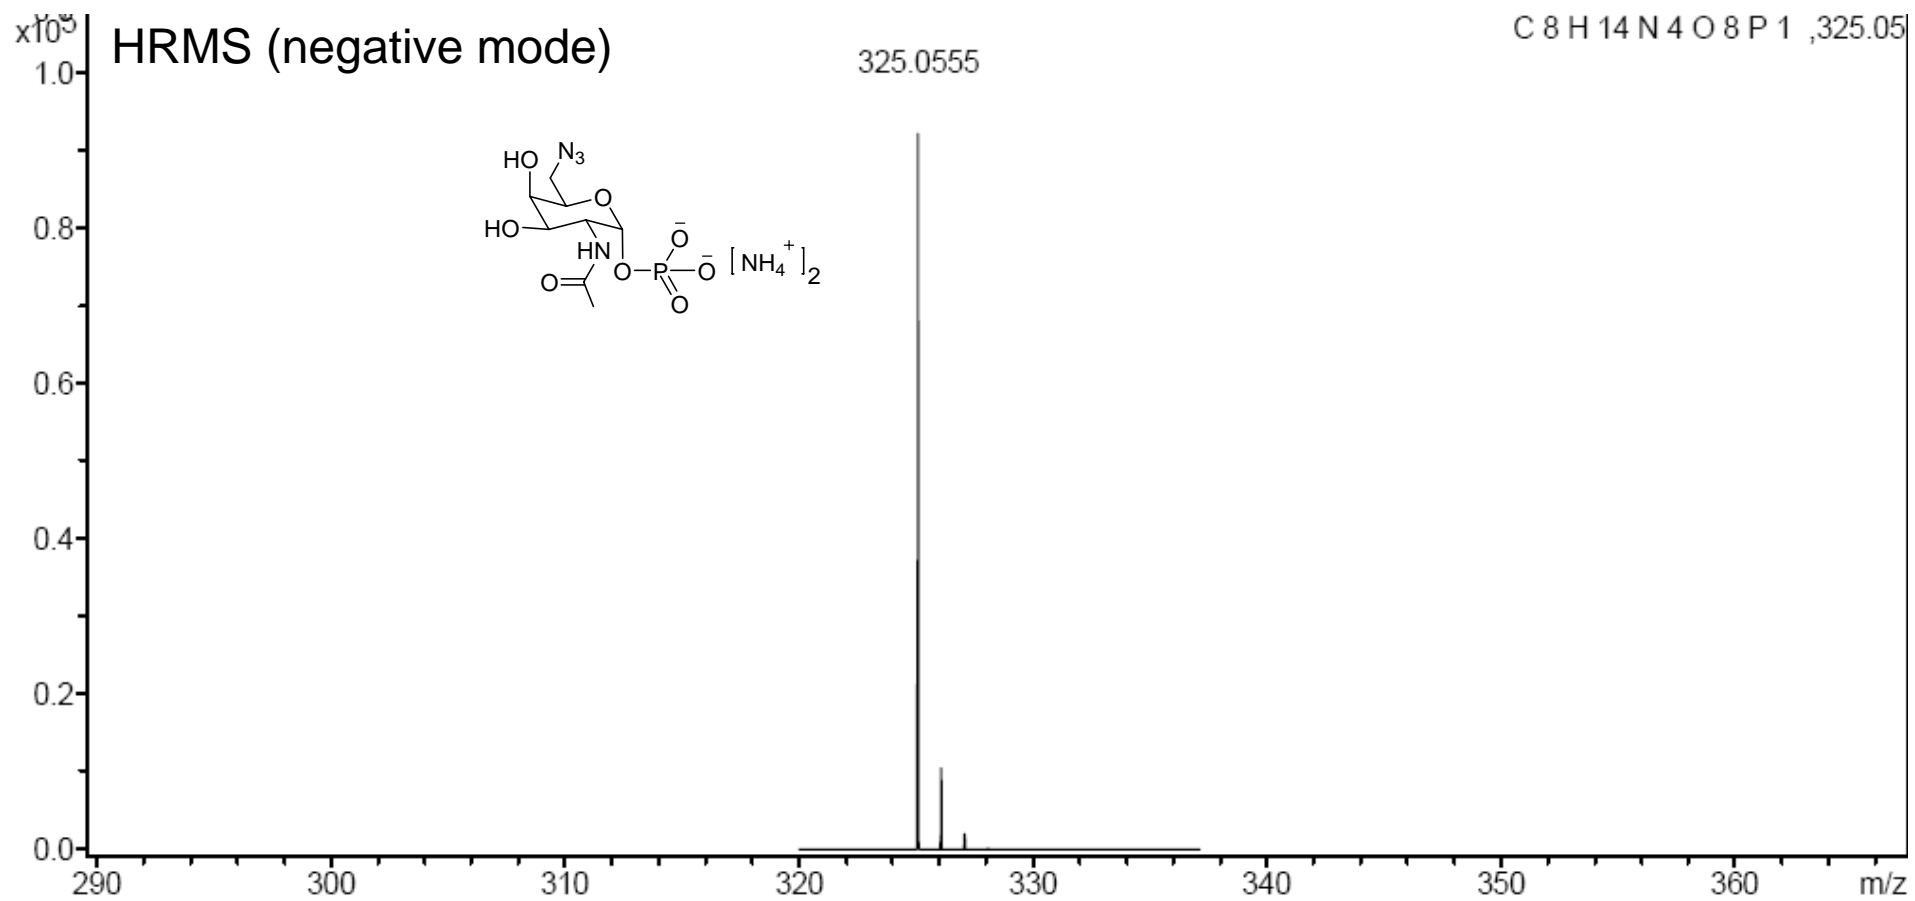

S5

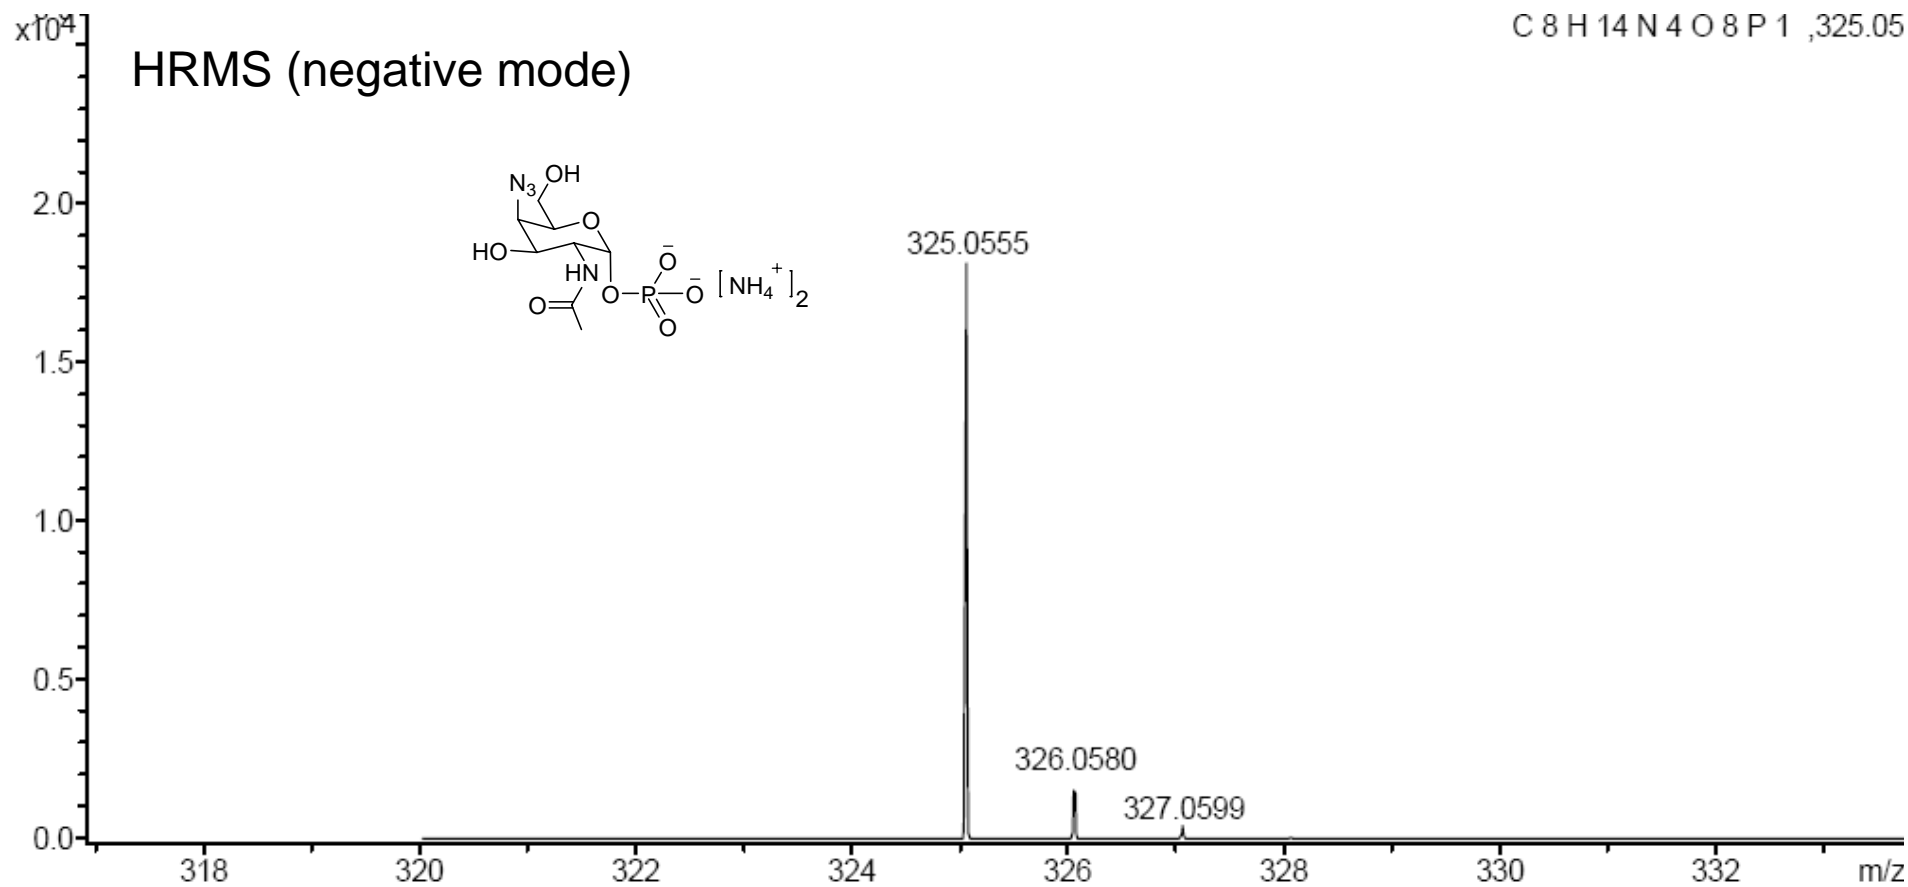

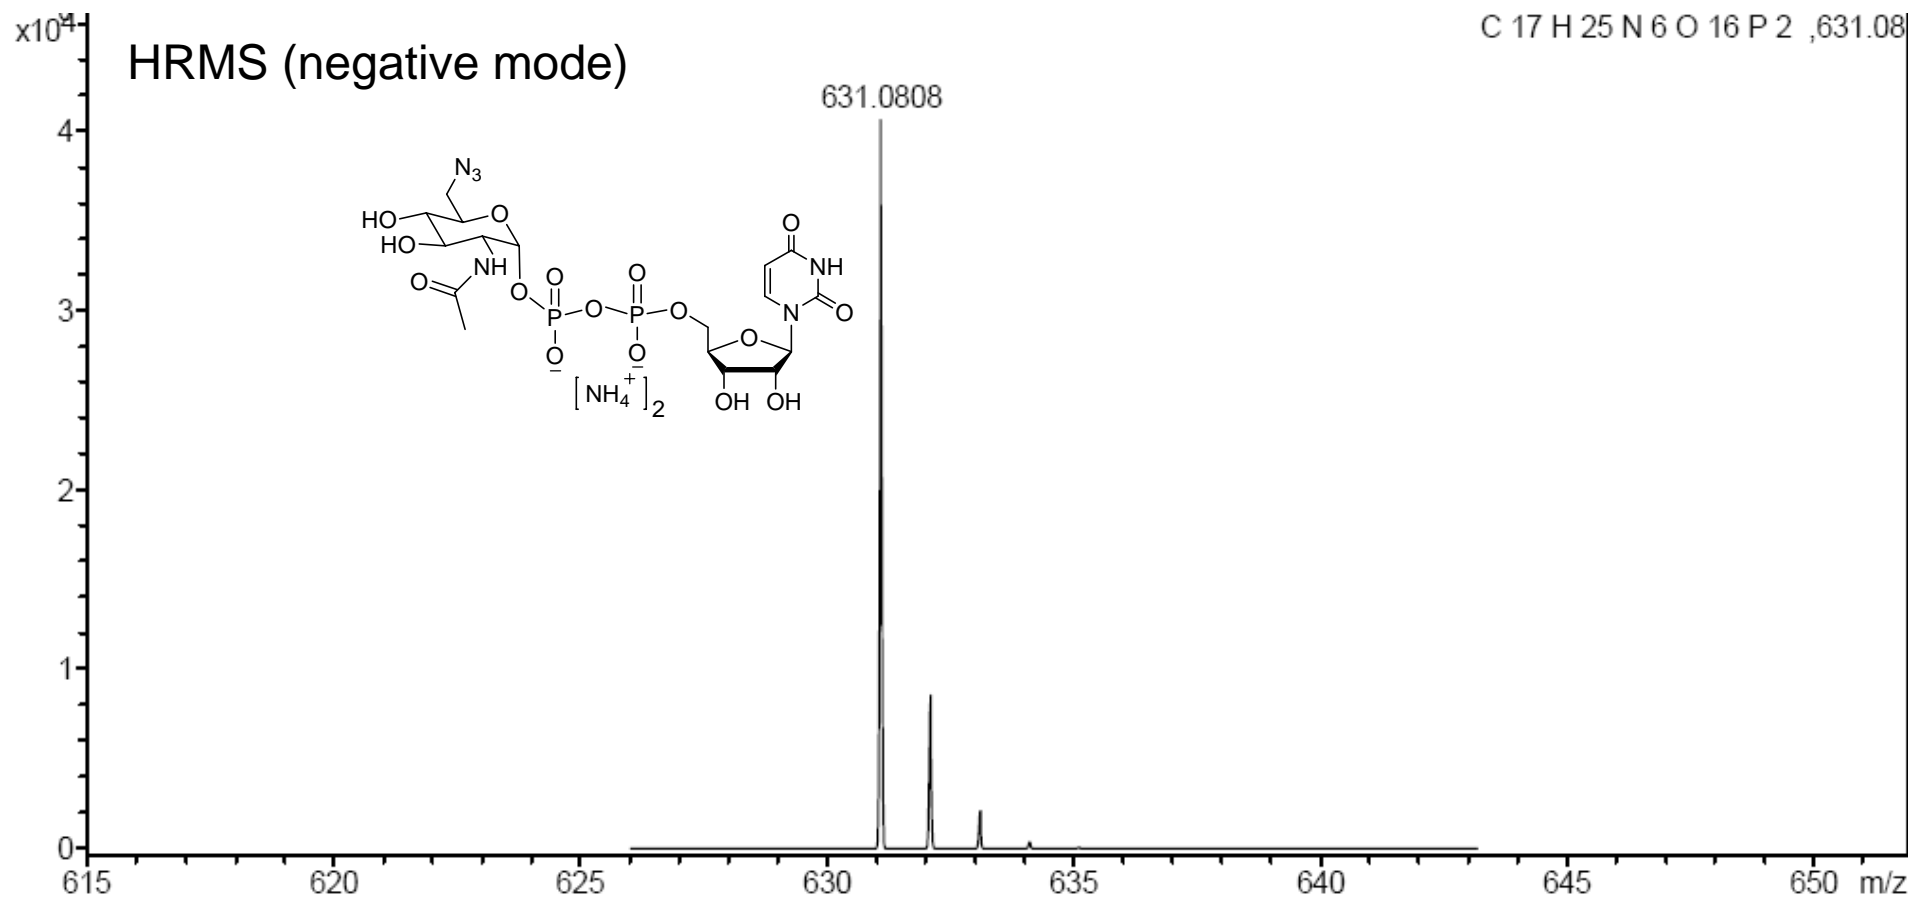

S5

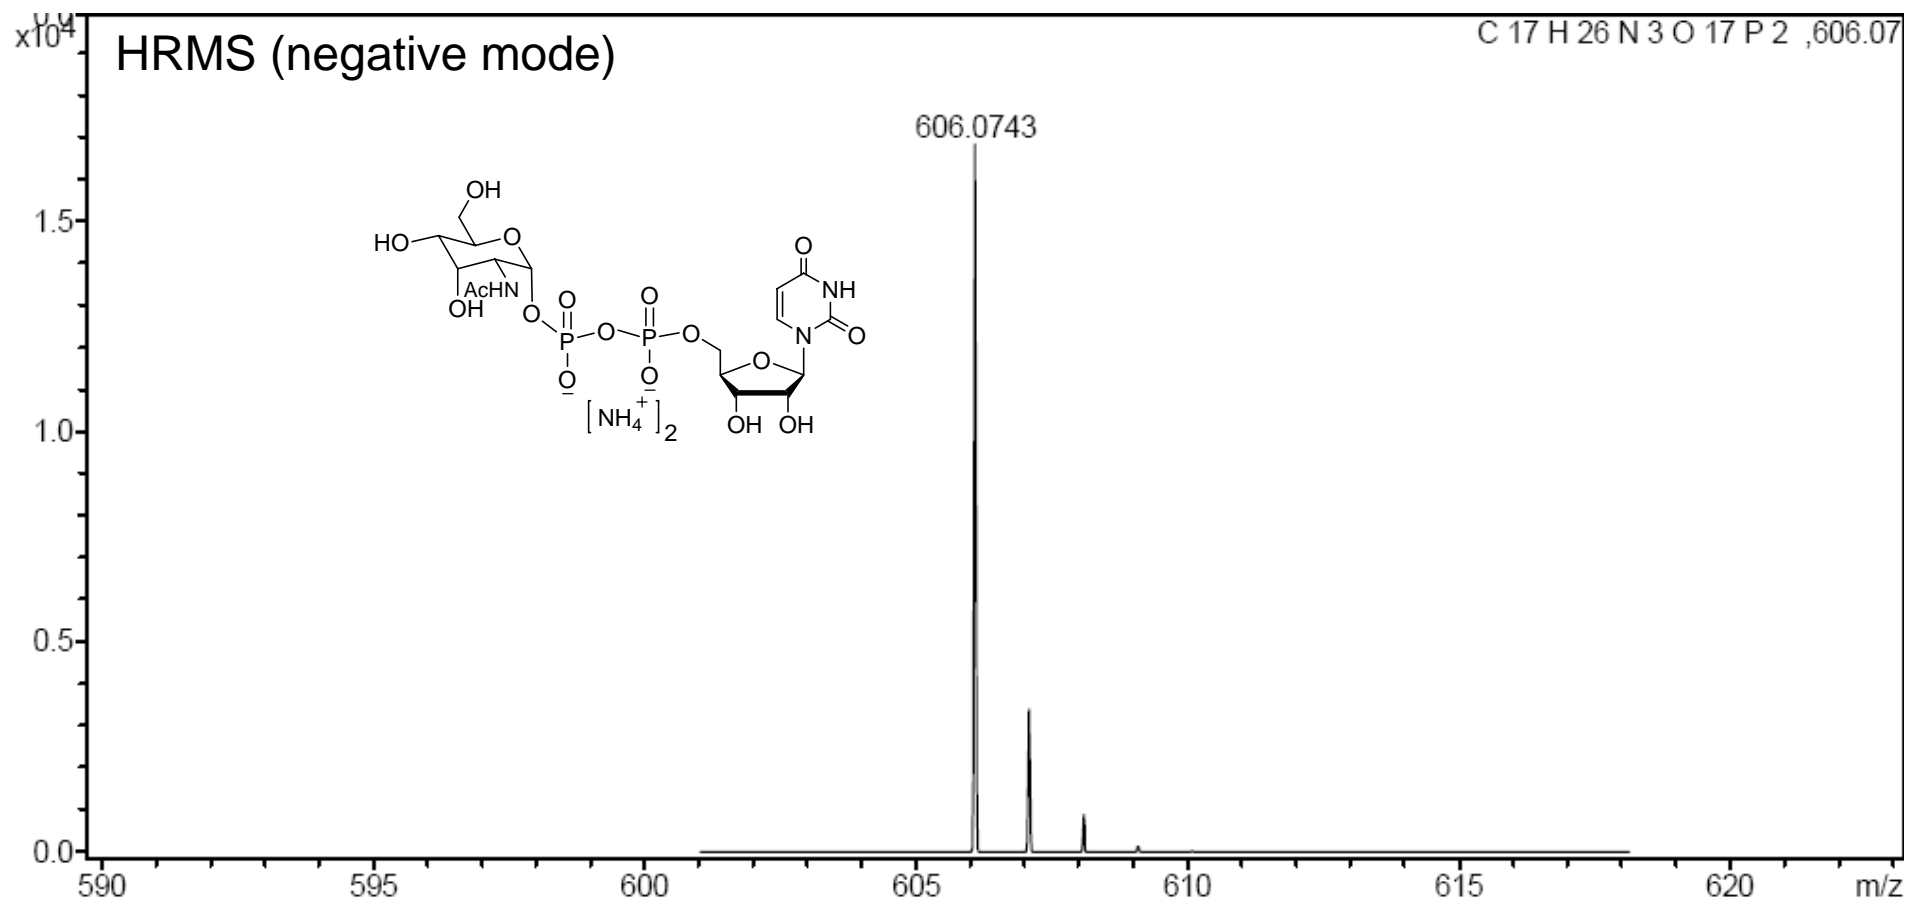

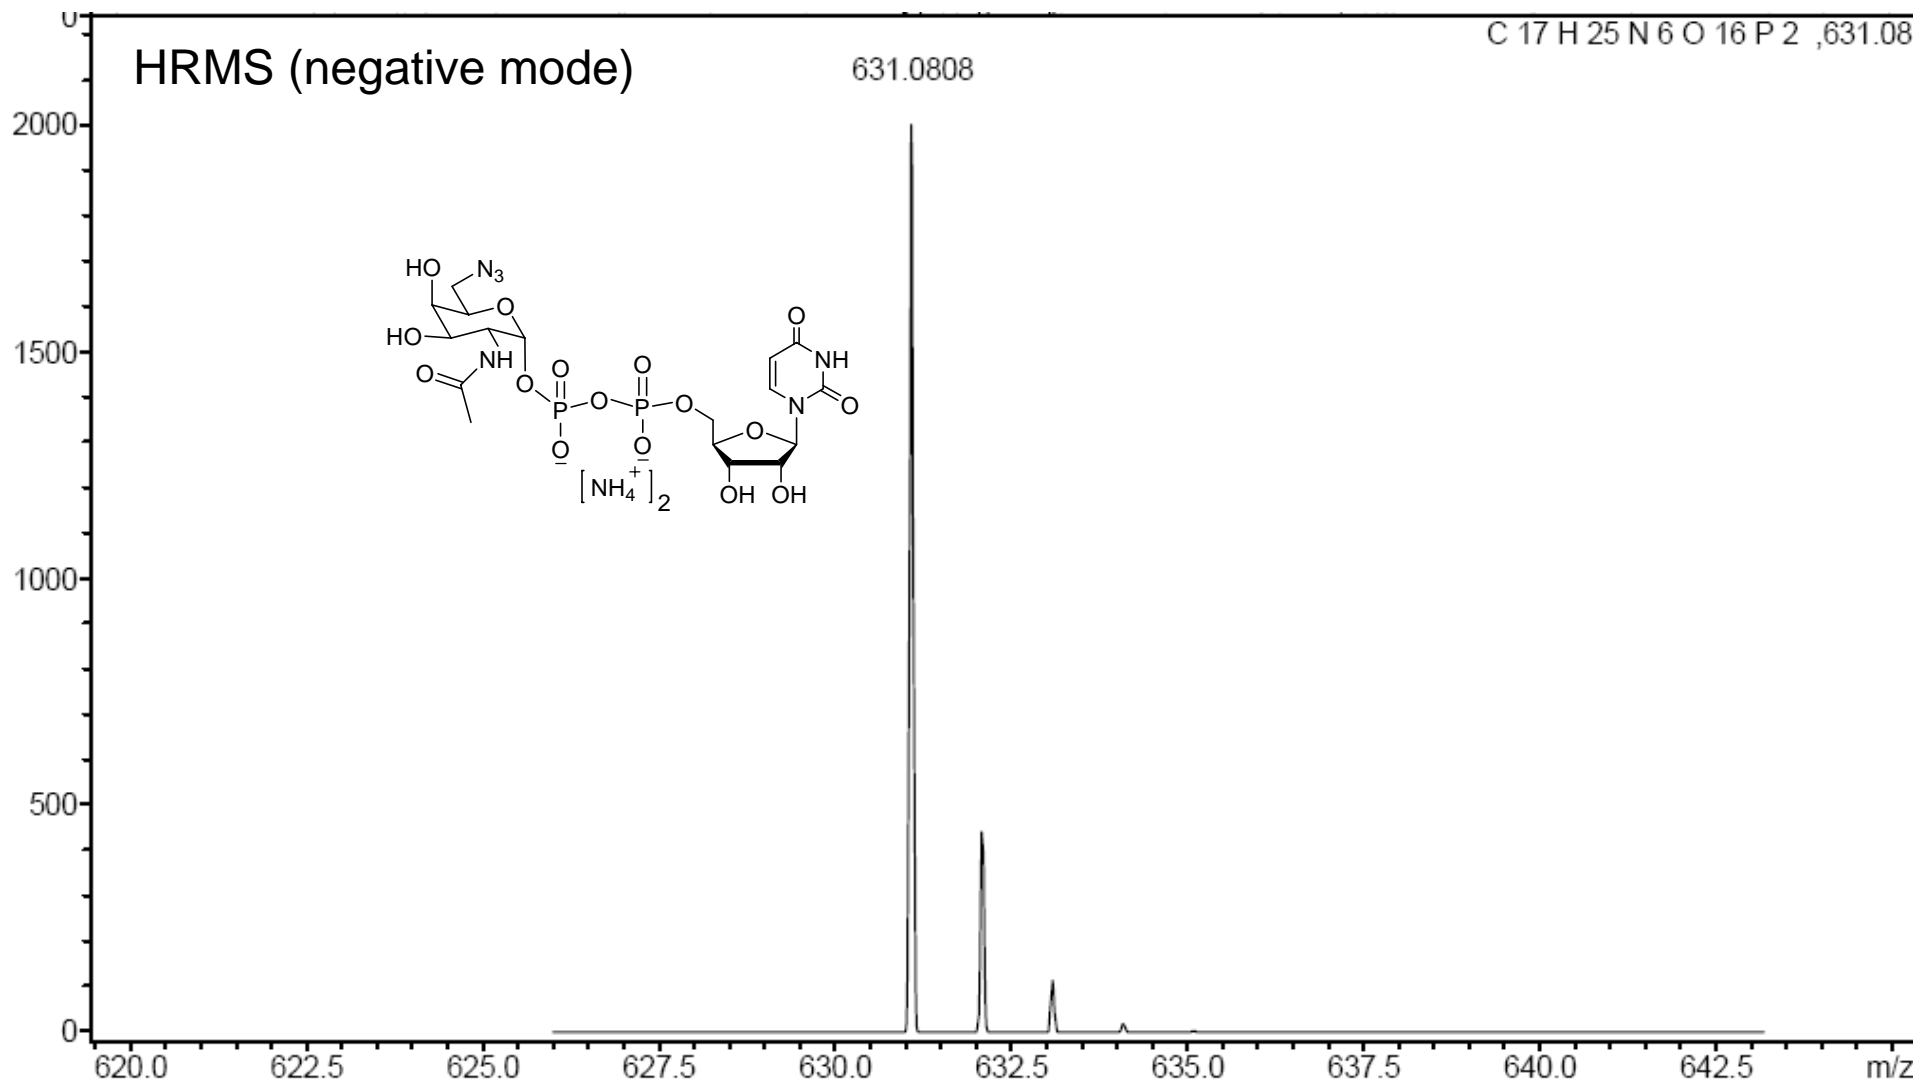

Supplement: NIHMS223278-supplement-1.pdf [file NIHMS223278-supplement-1.pdf]
